# Supplementary material for: APP lysine 612 lactylation ameliorates amyloid pathology and memory decline in Alzheimer’s disease
Source: JCI journal article supplement (doi:10.1172/jci184656), 2025-01-01

**Figure 1A.**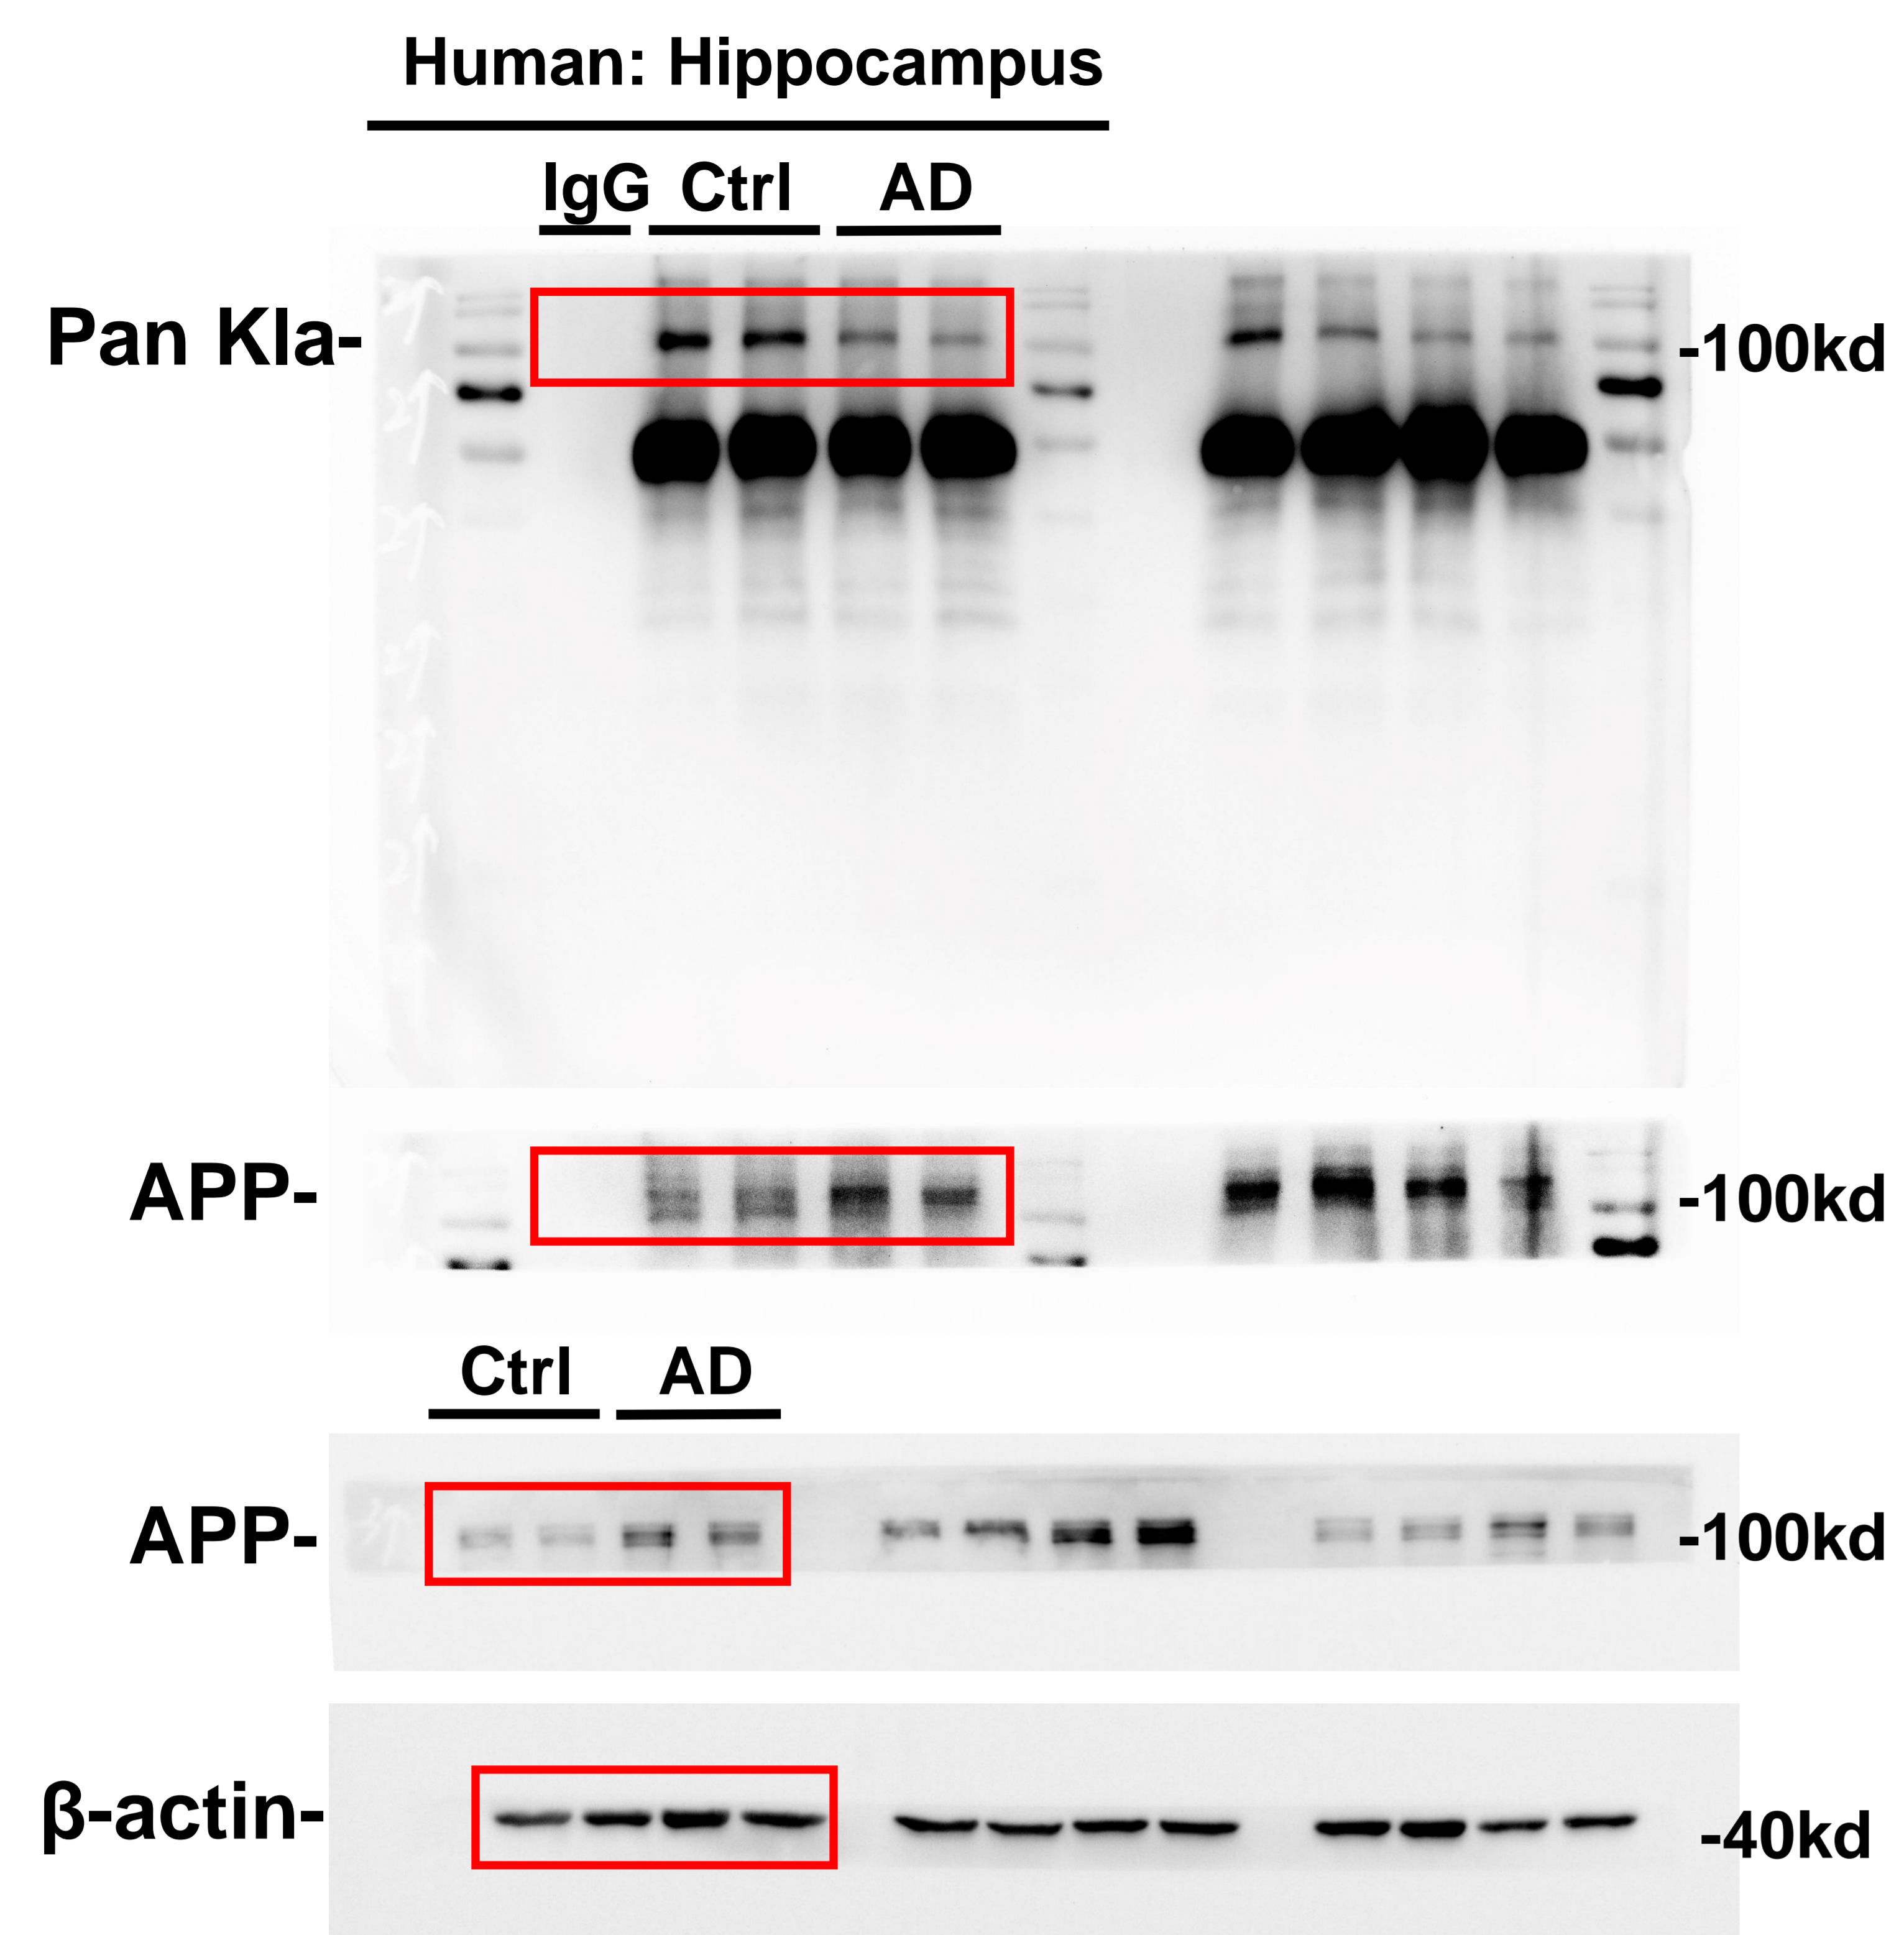**Figure 1C.**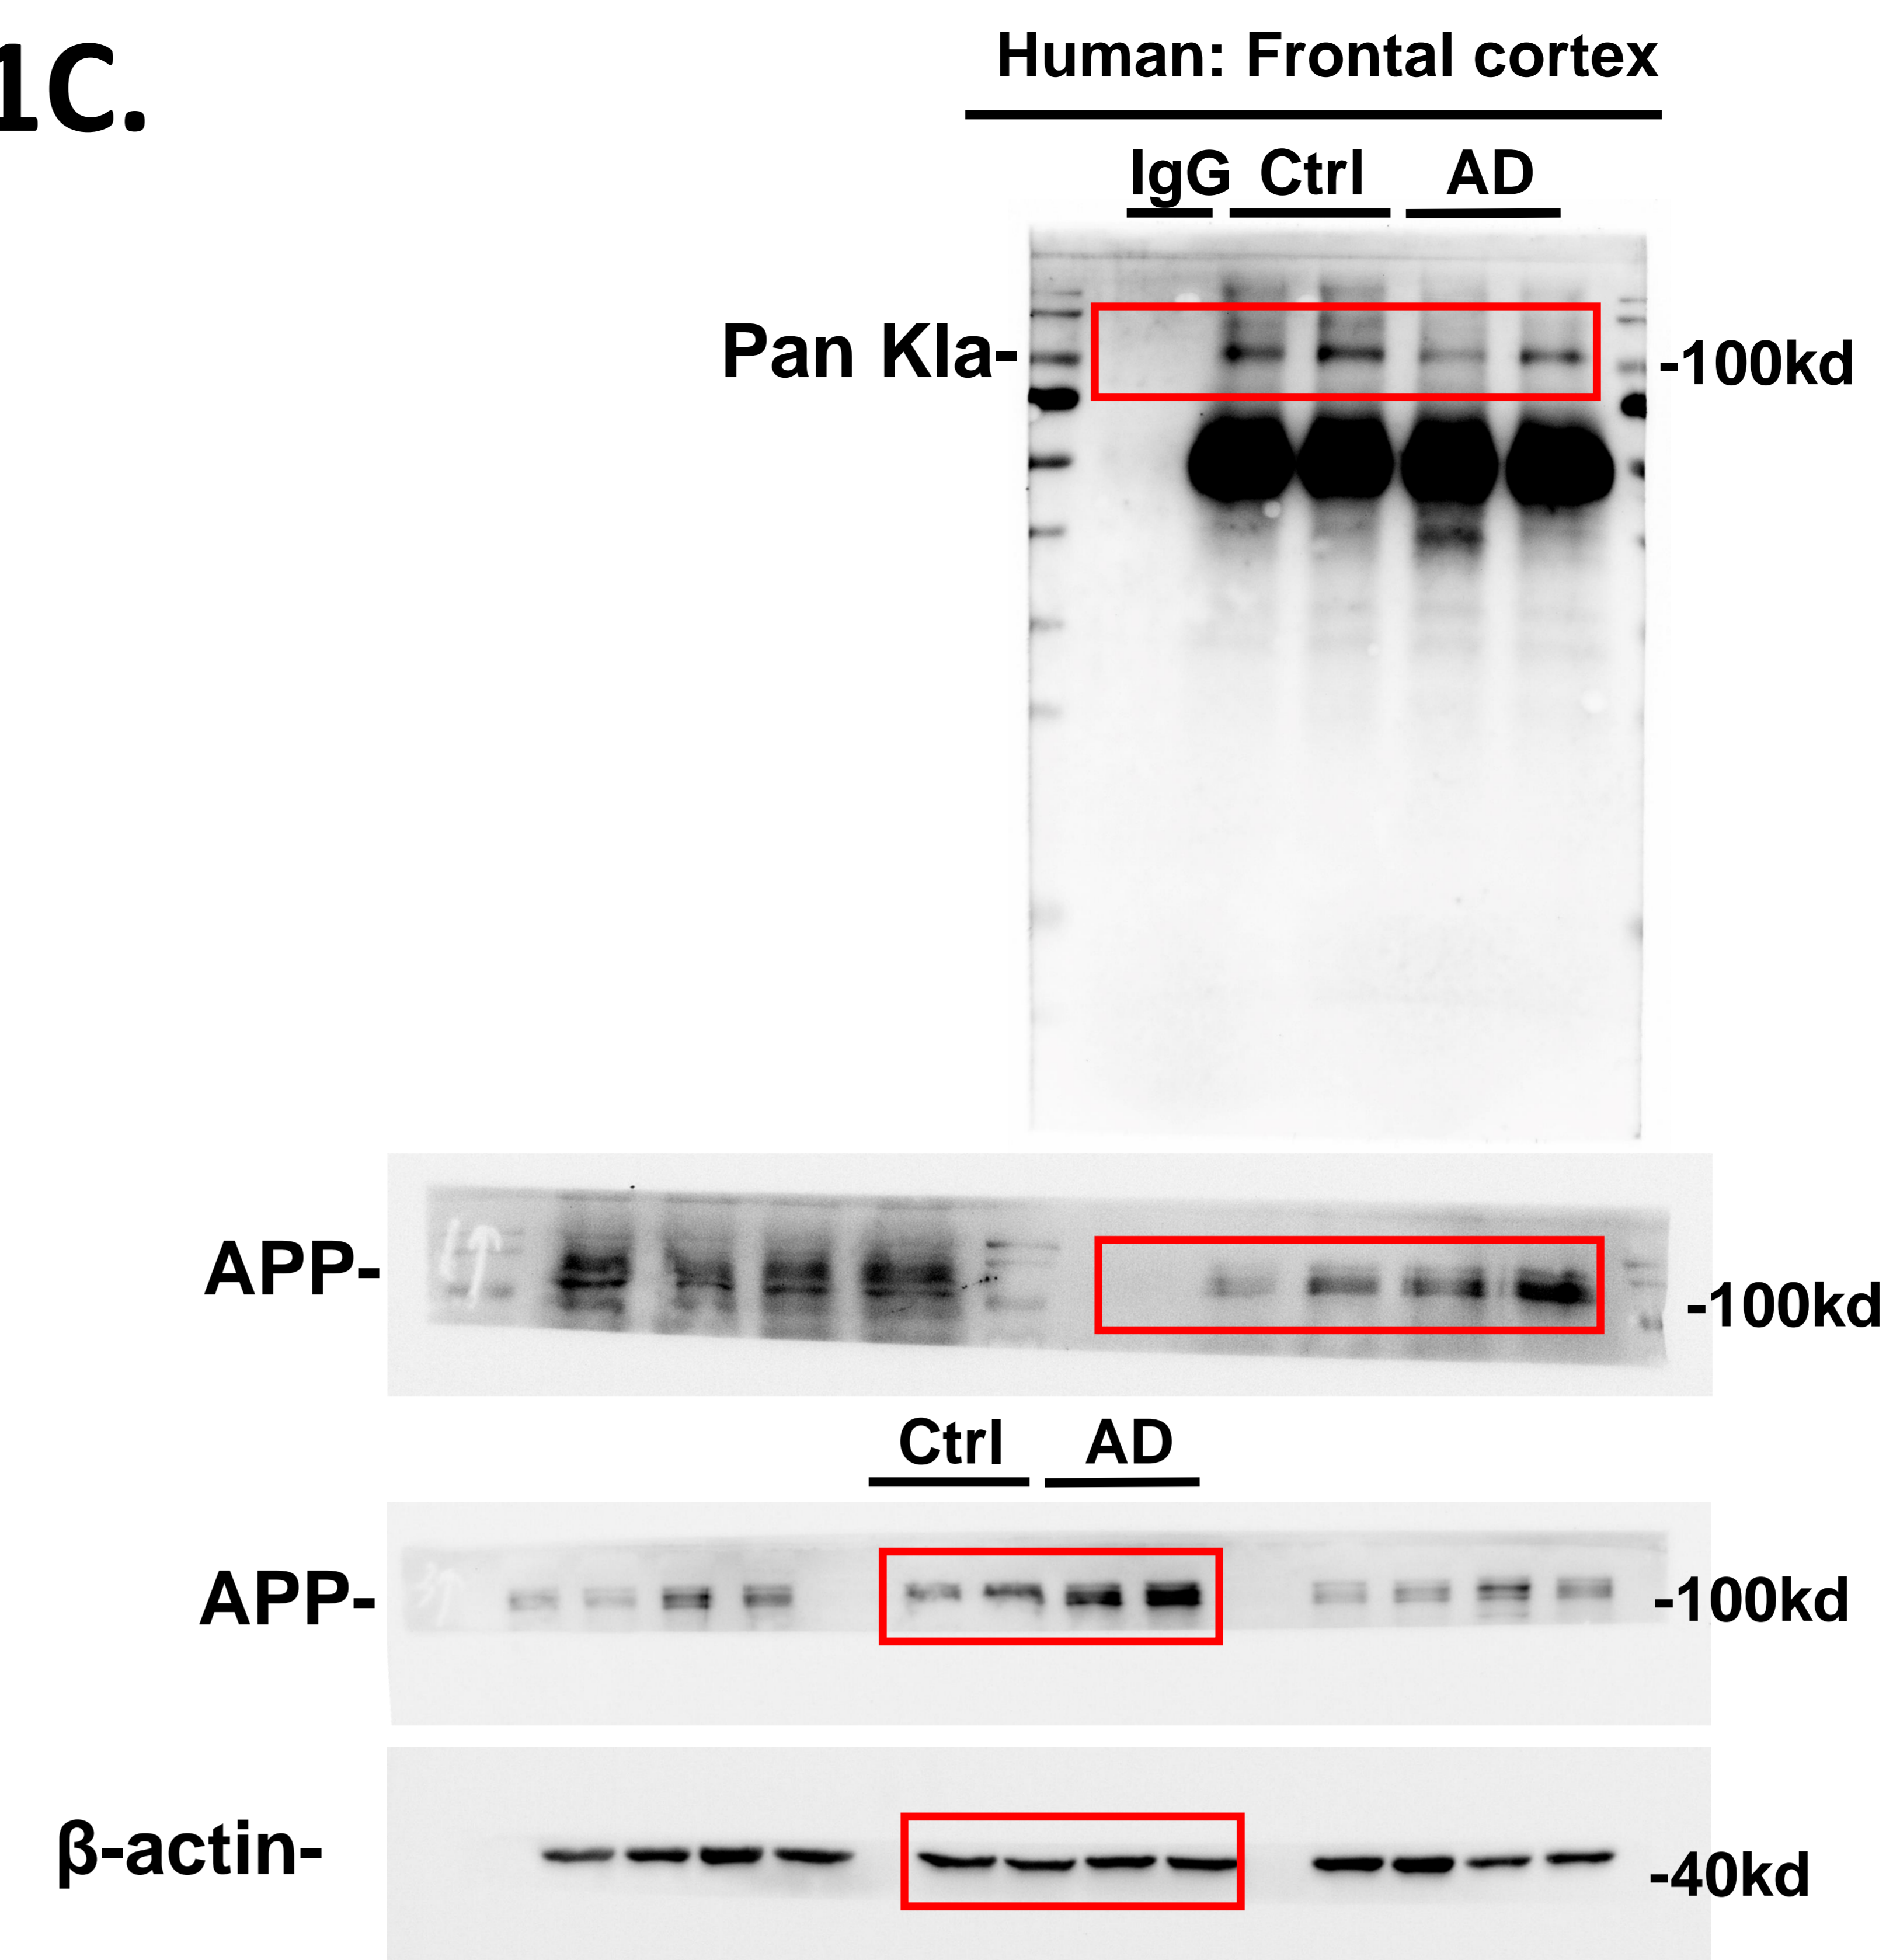**Figure 1E.**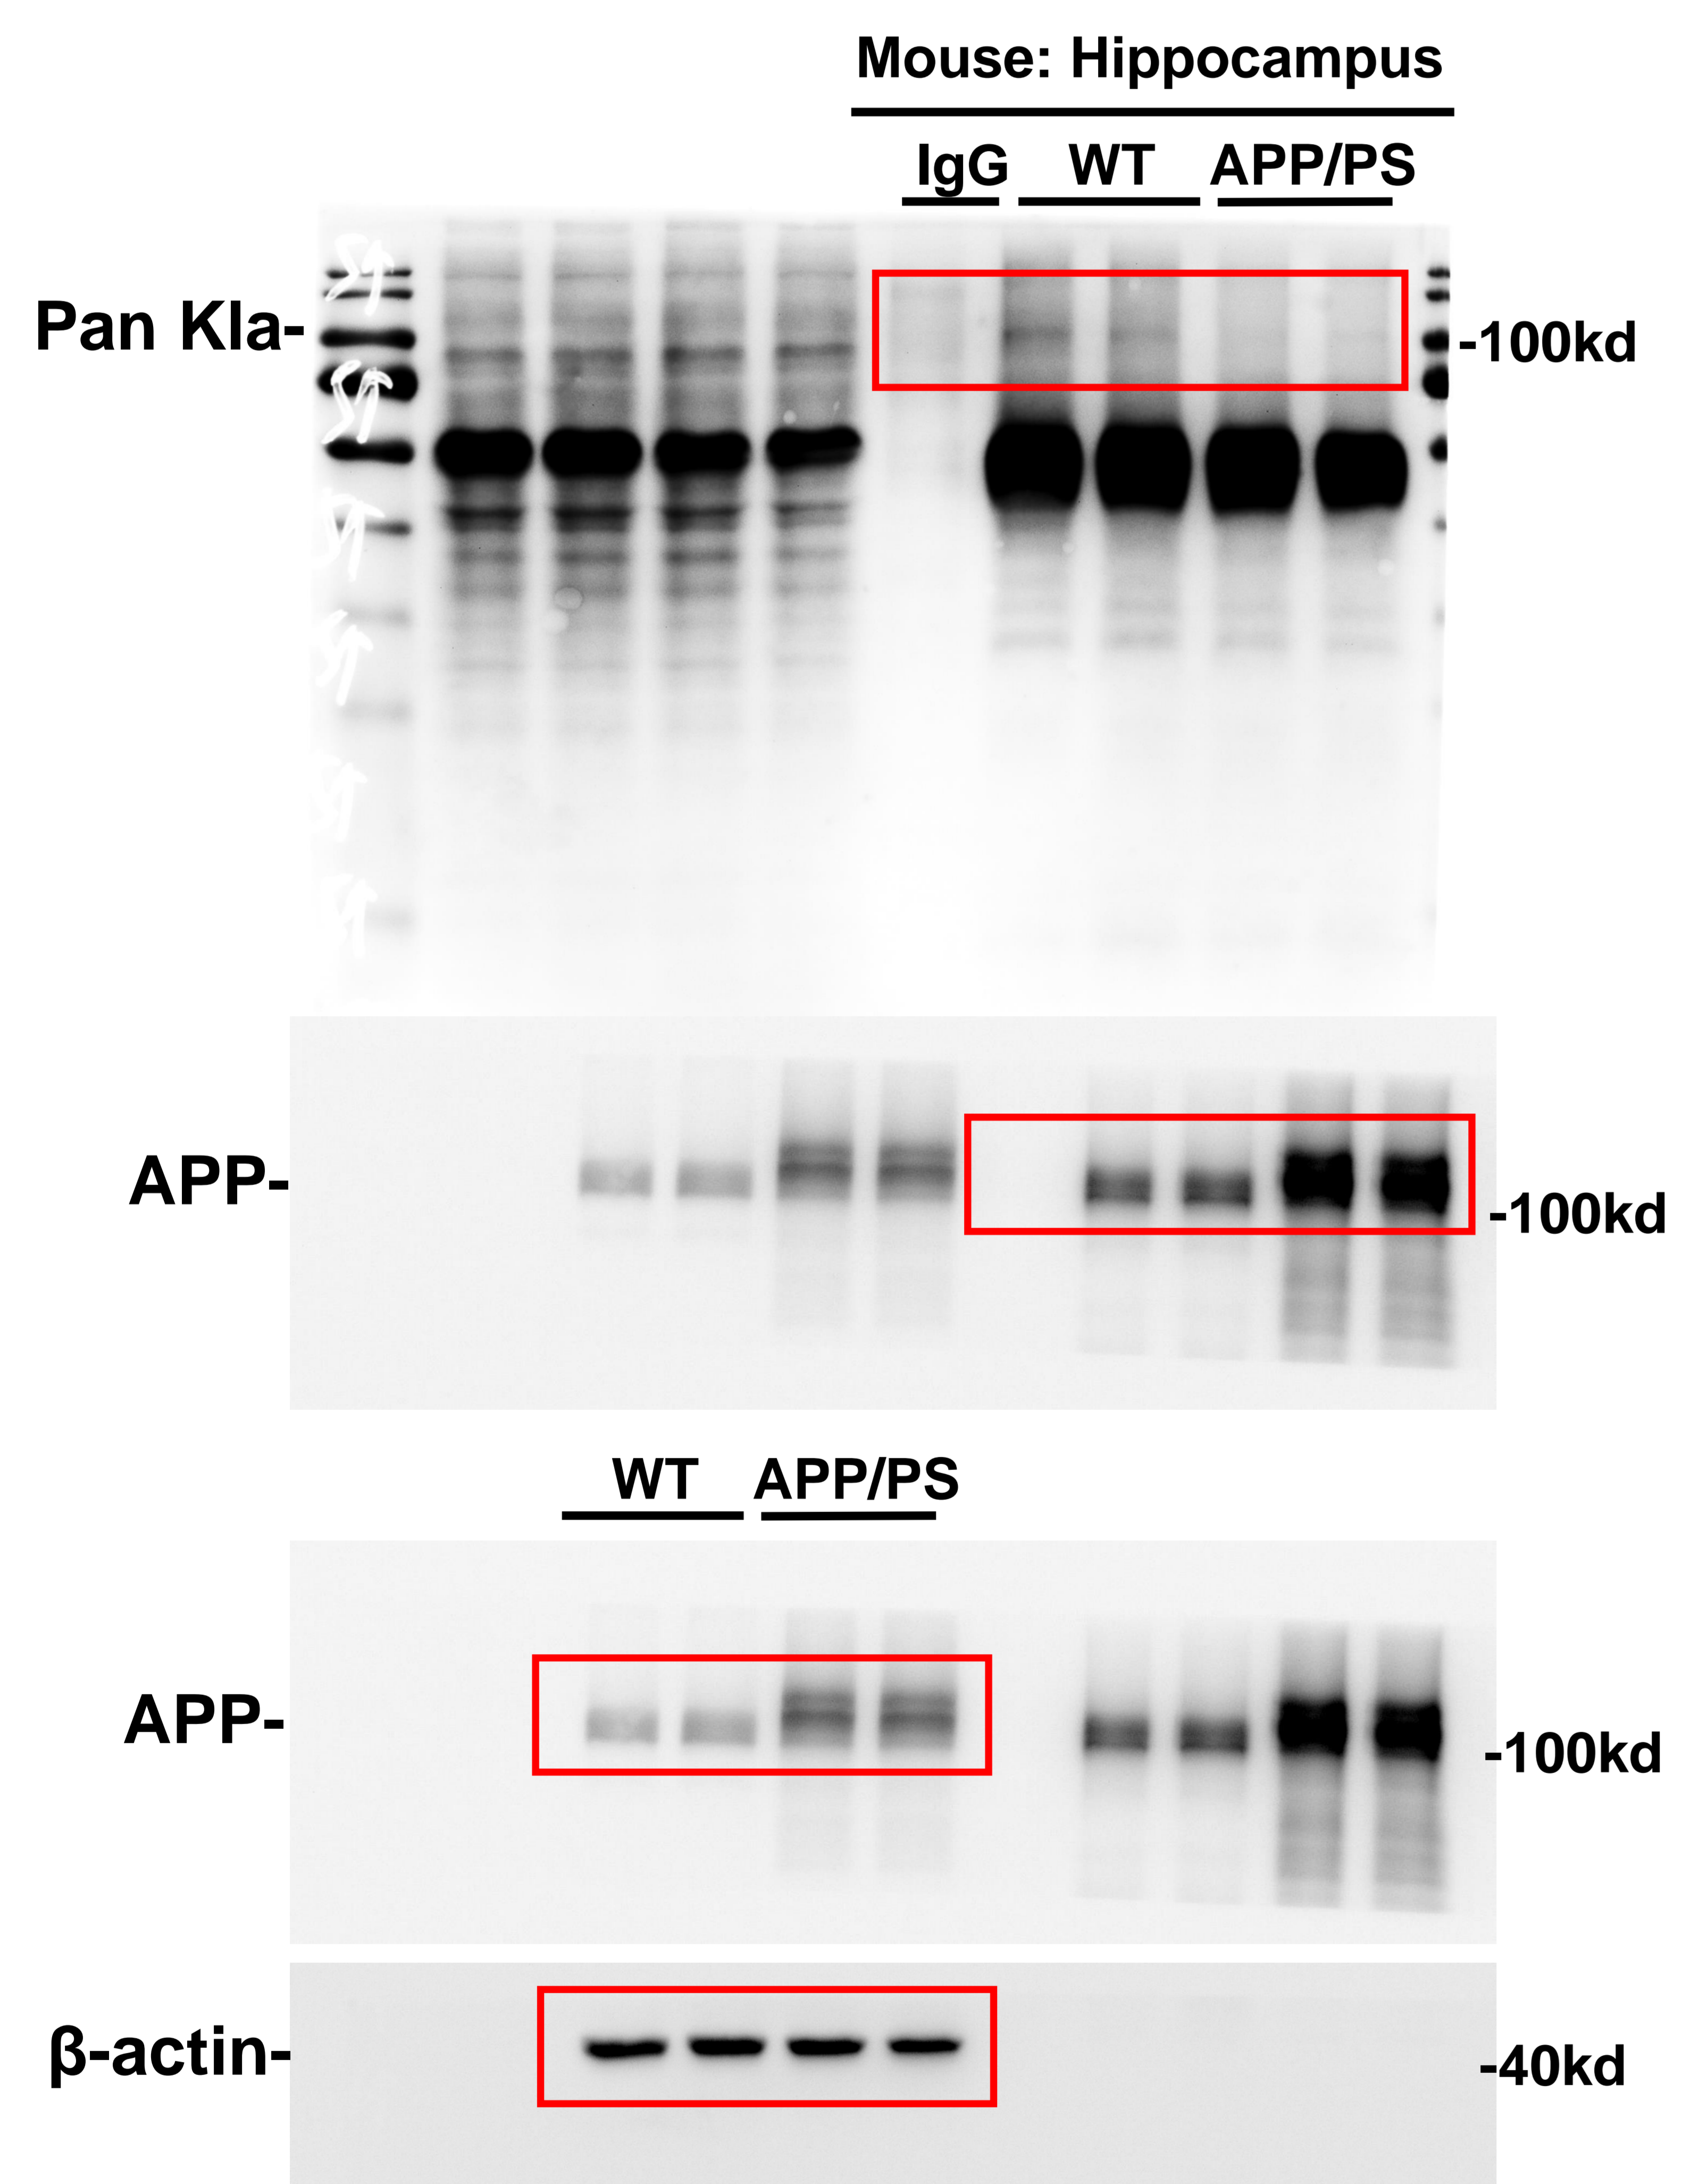**Figure 1G.**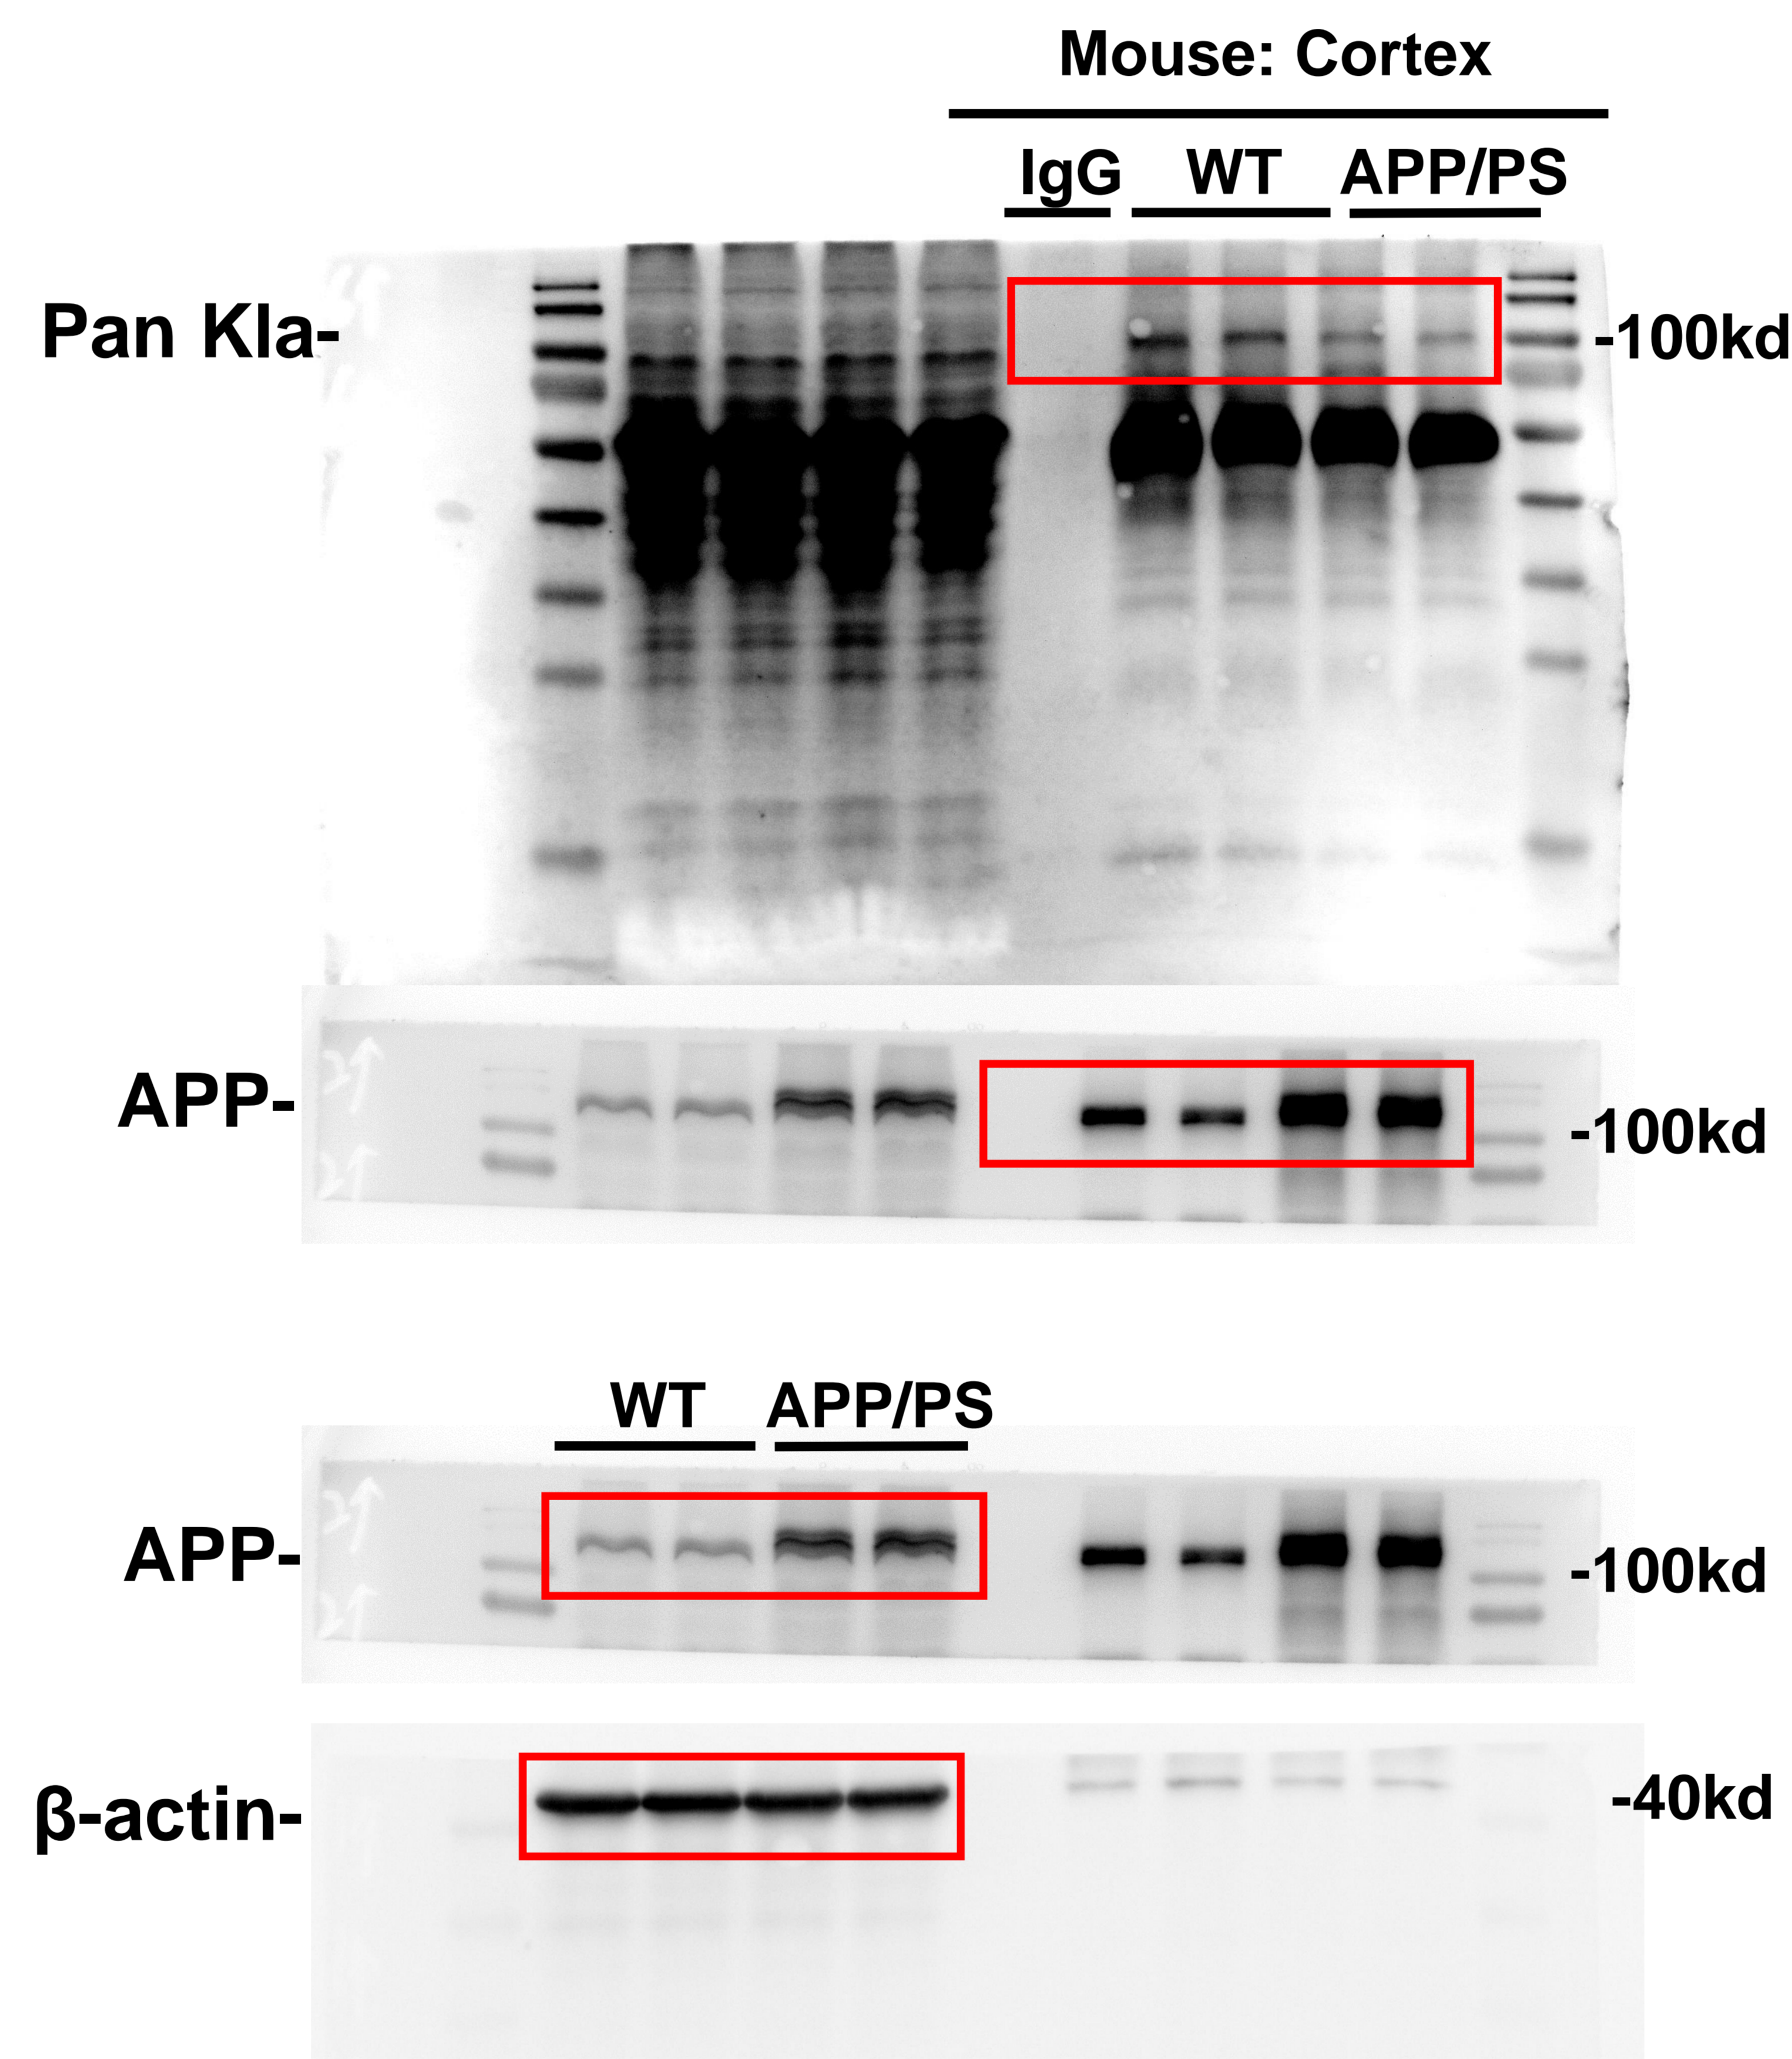**Figure 1L.**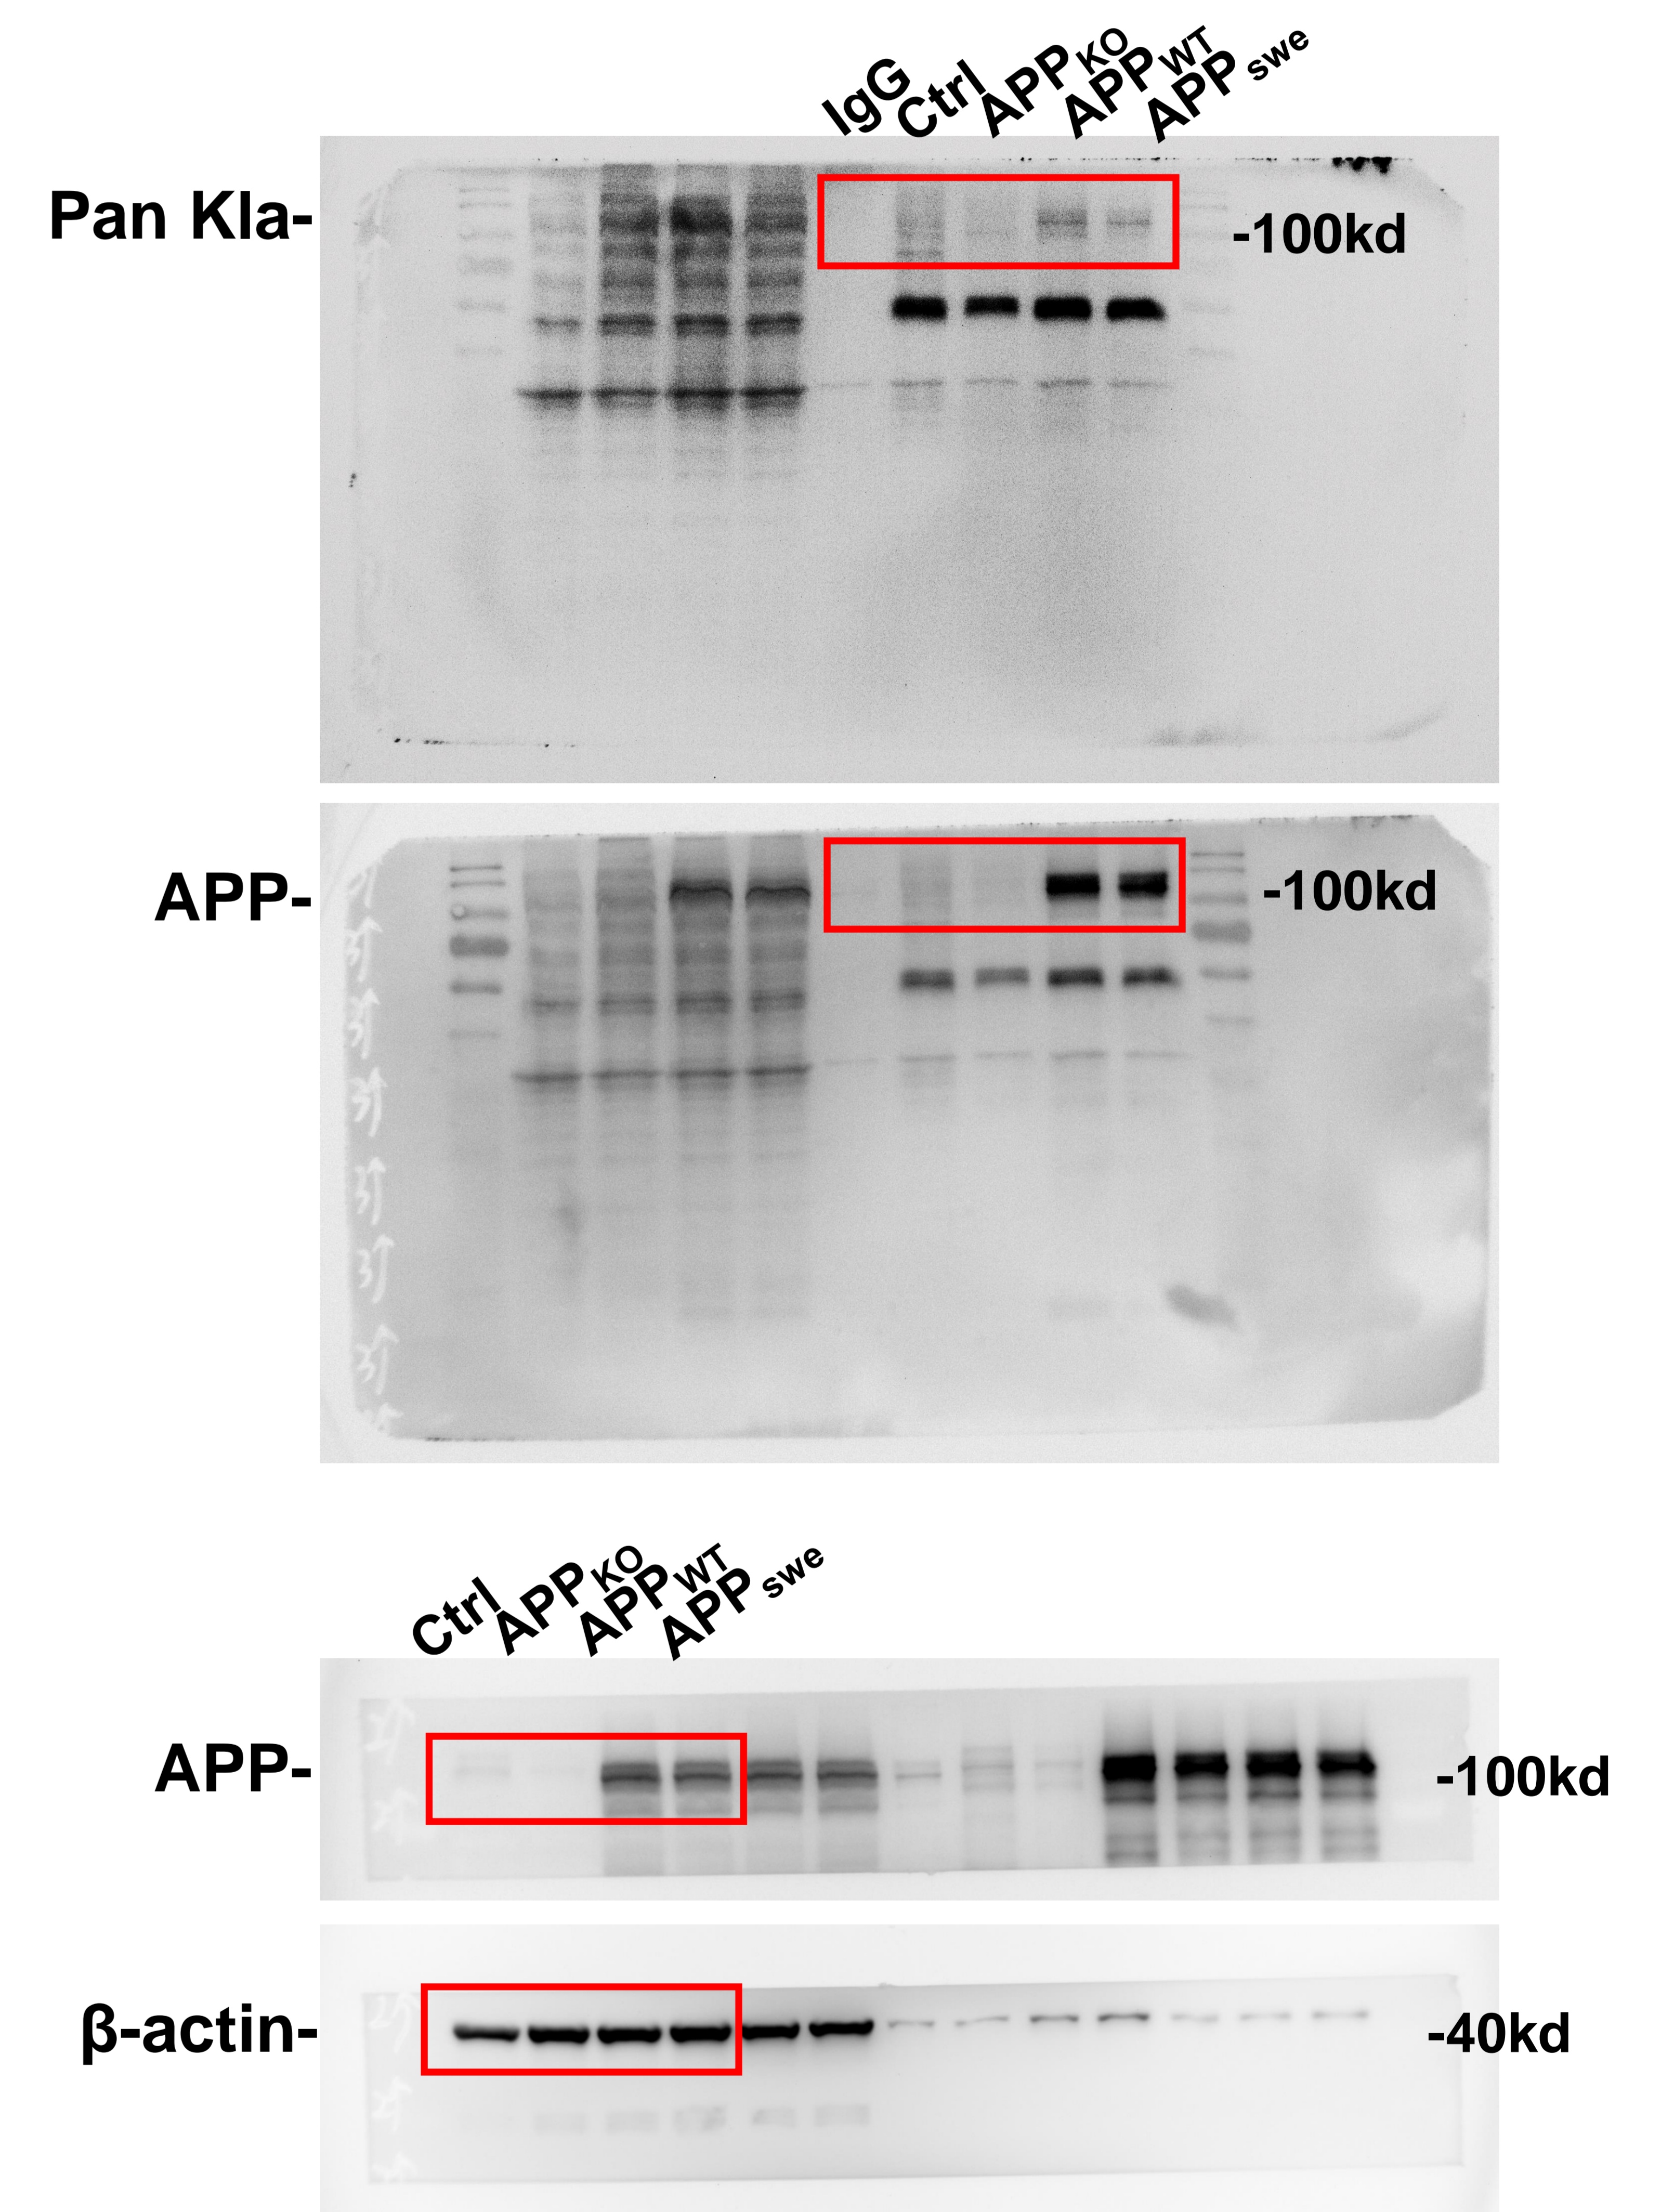**Figure 1J.**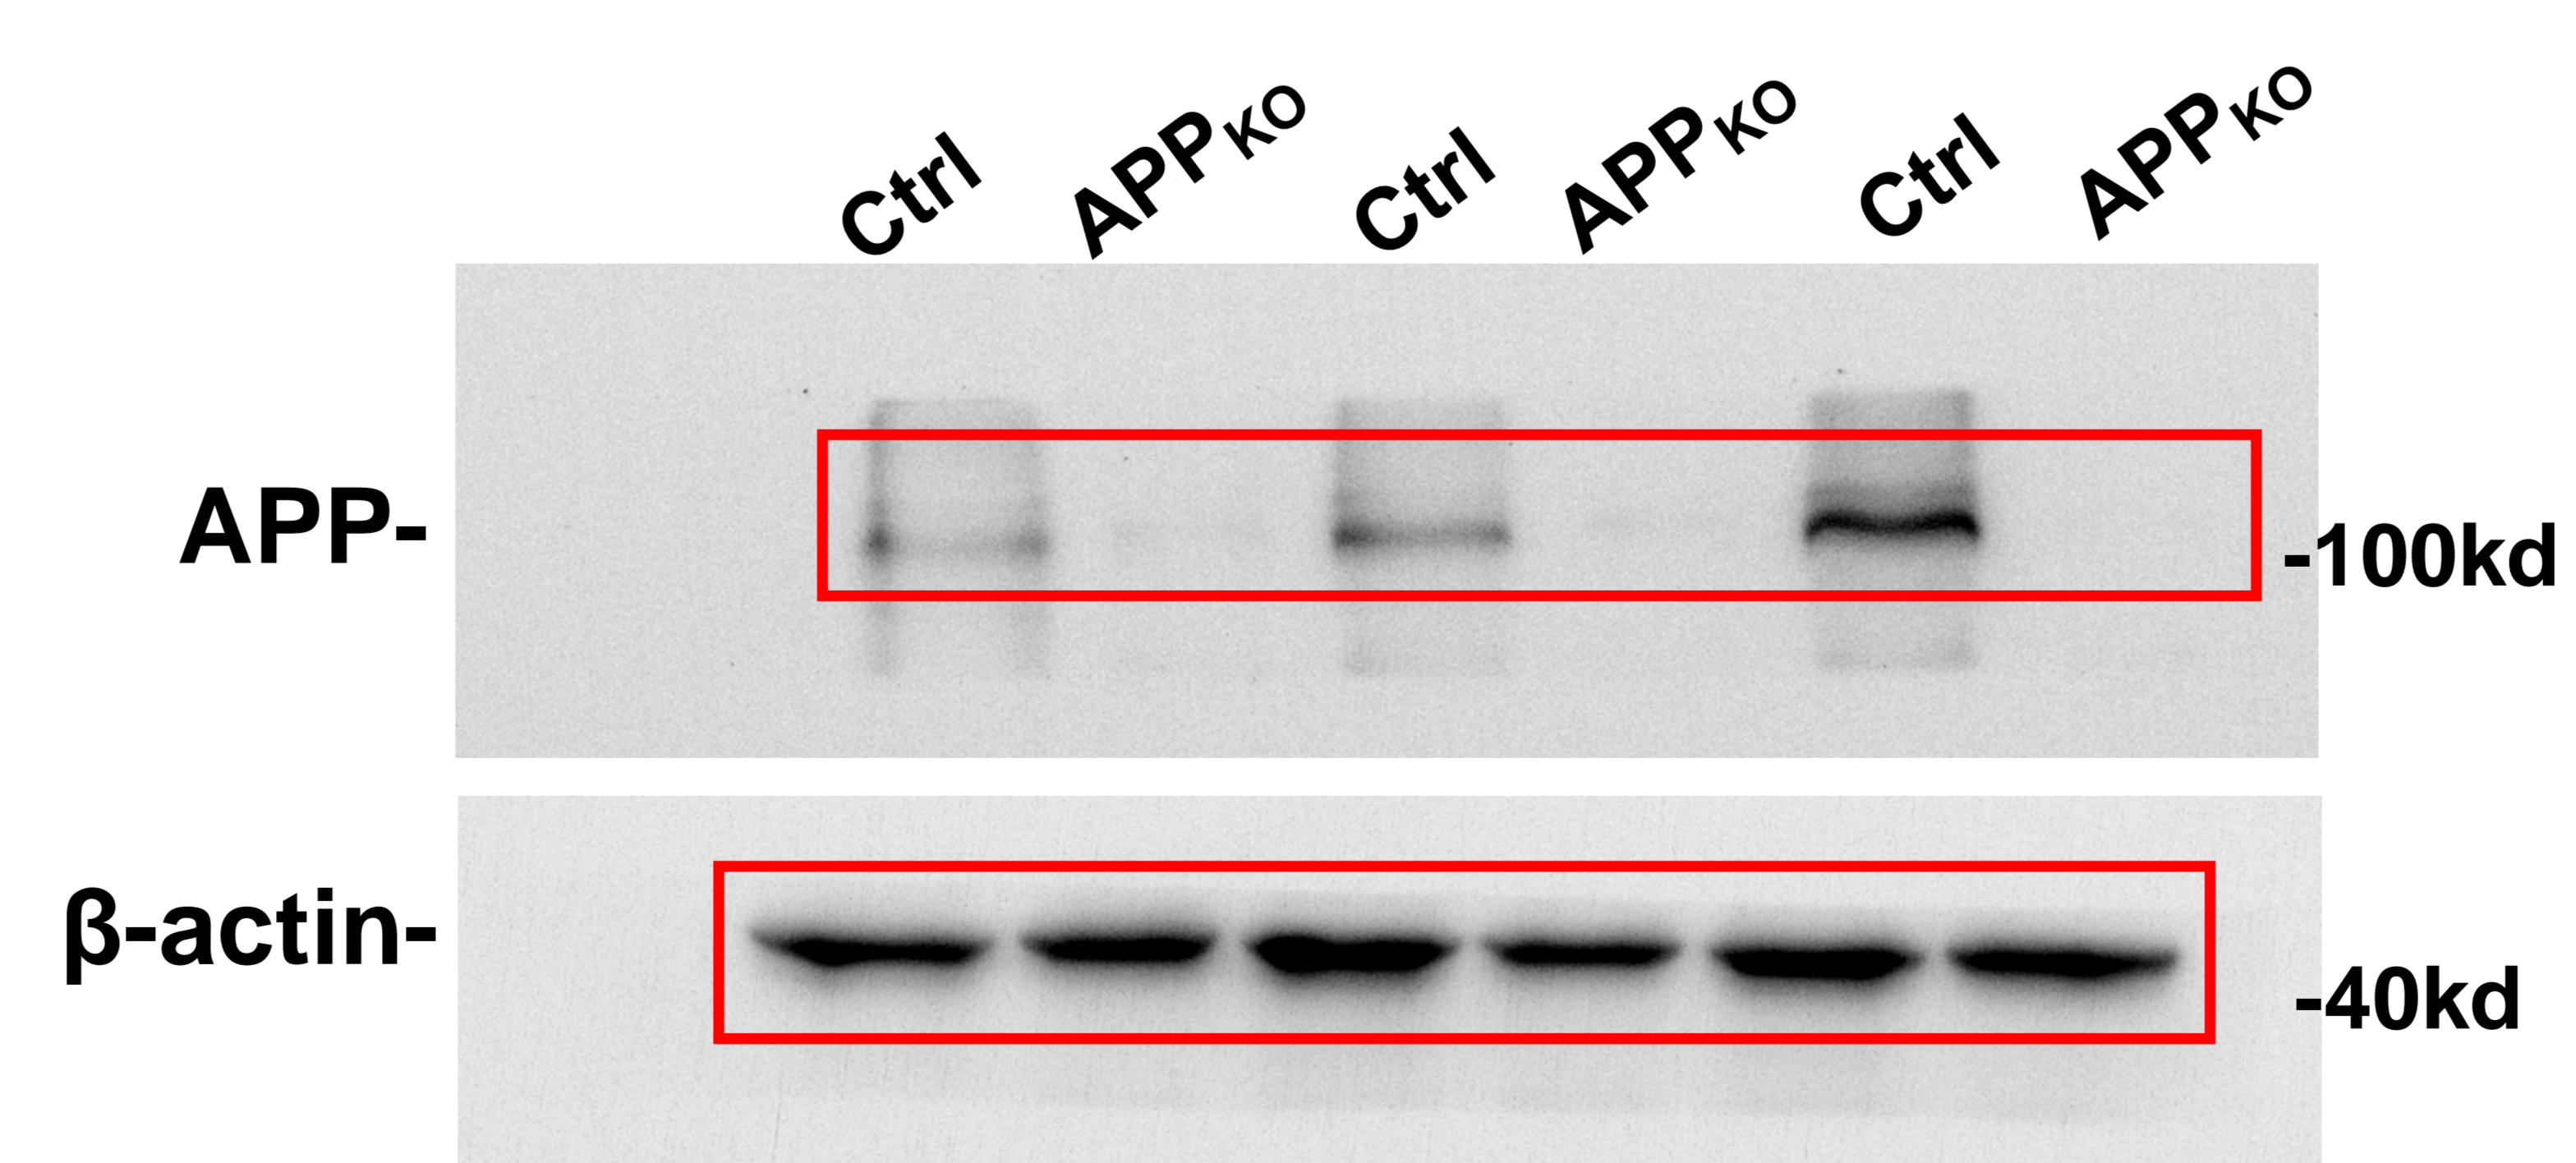

Figure 2E.

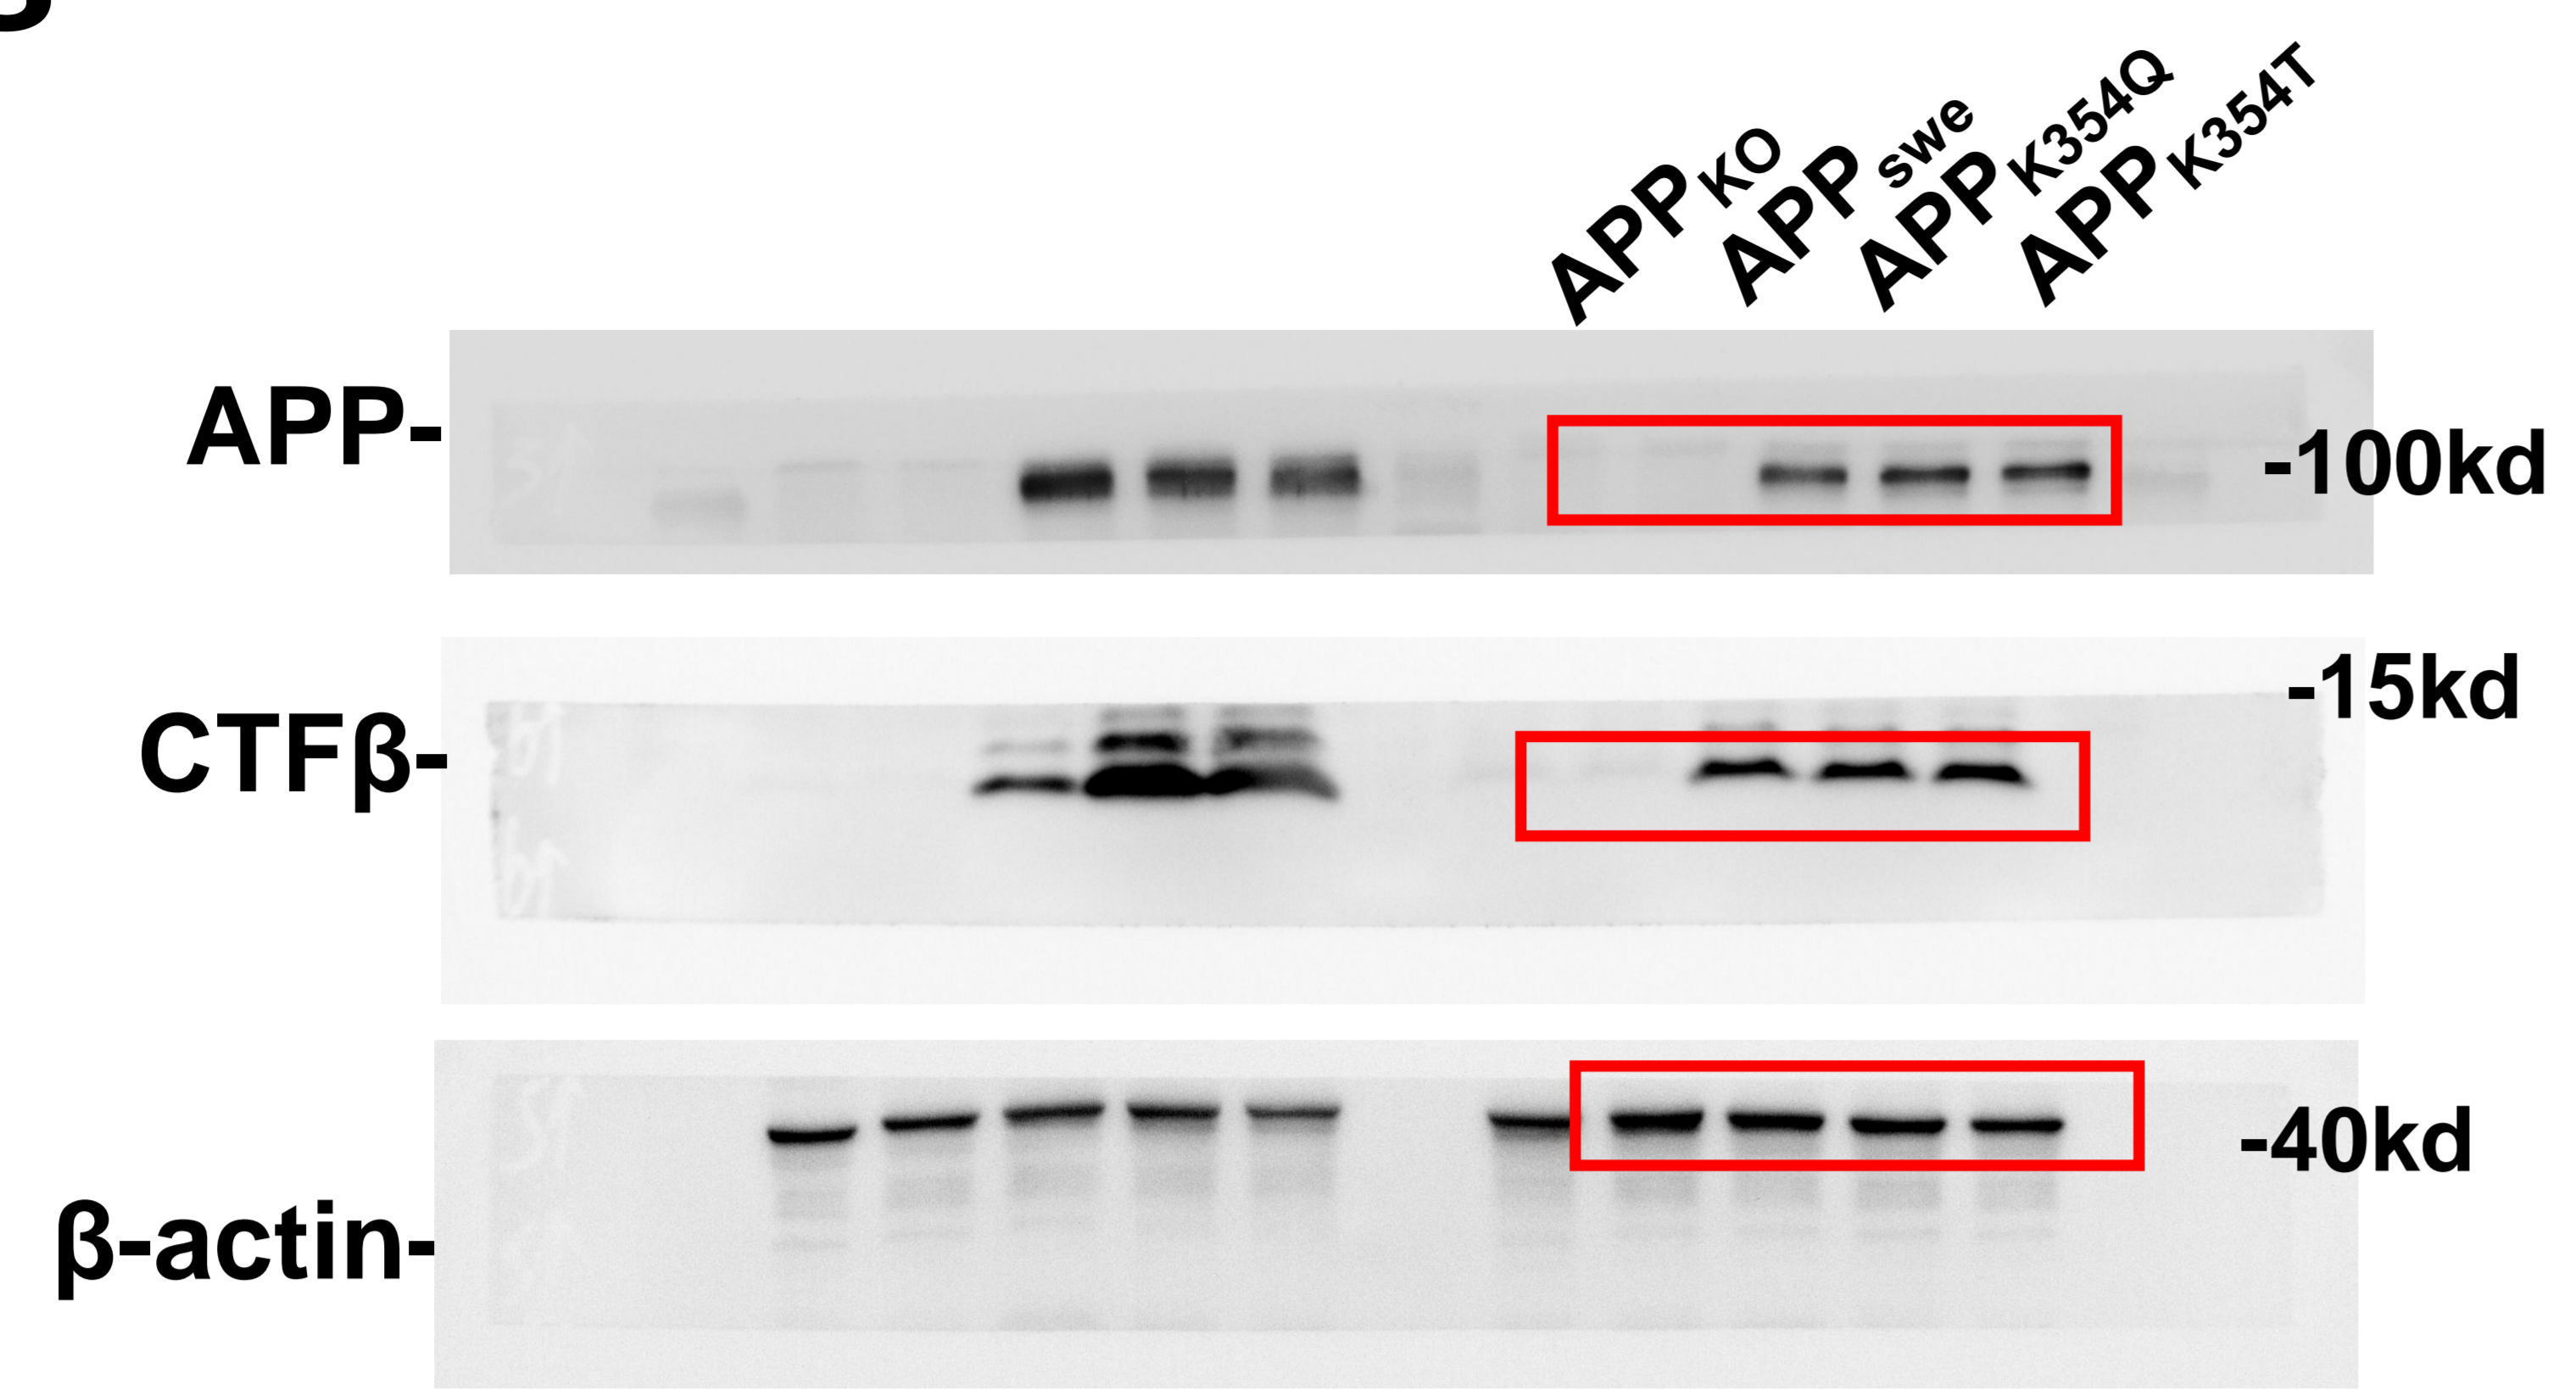

Figure 2K.

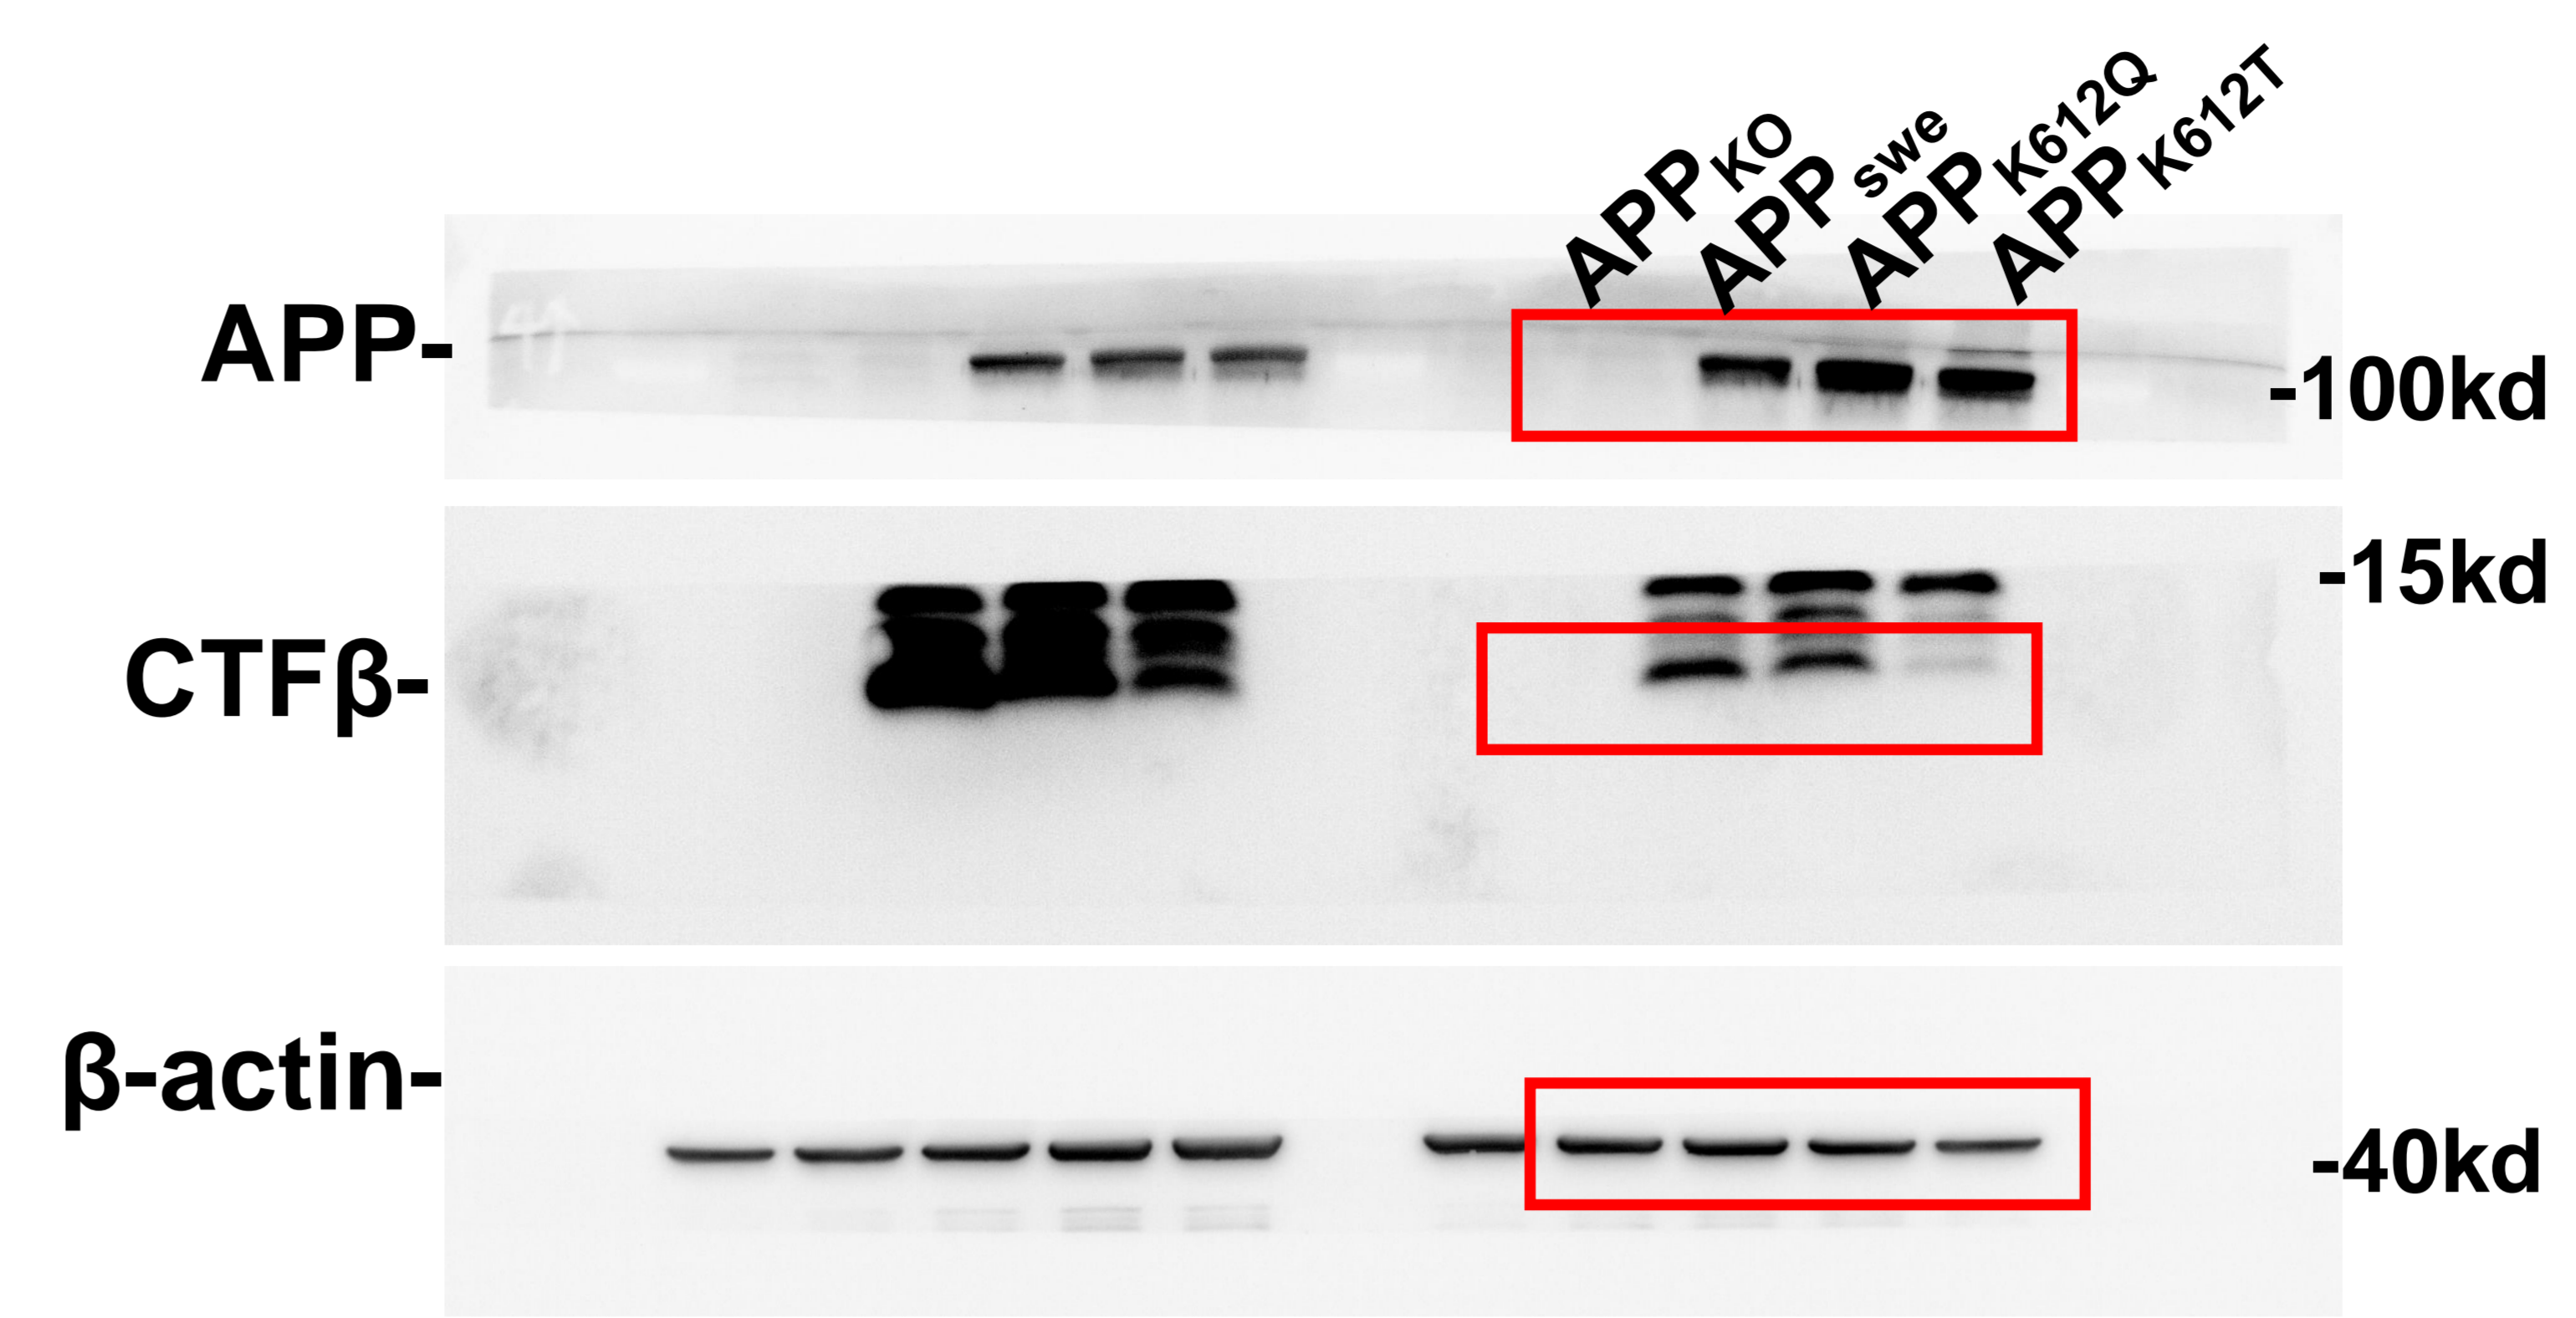

Figure 2H.

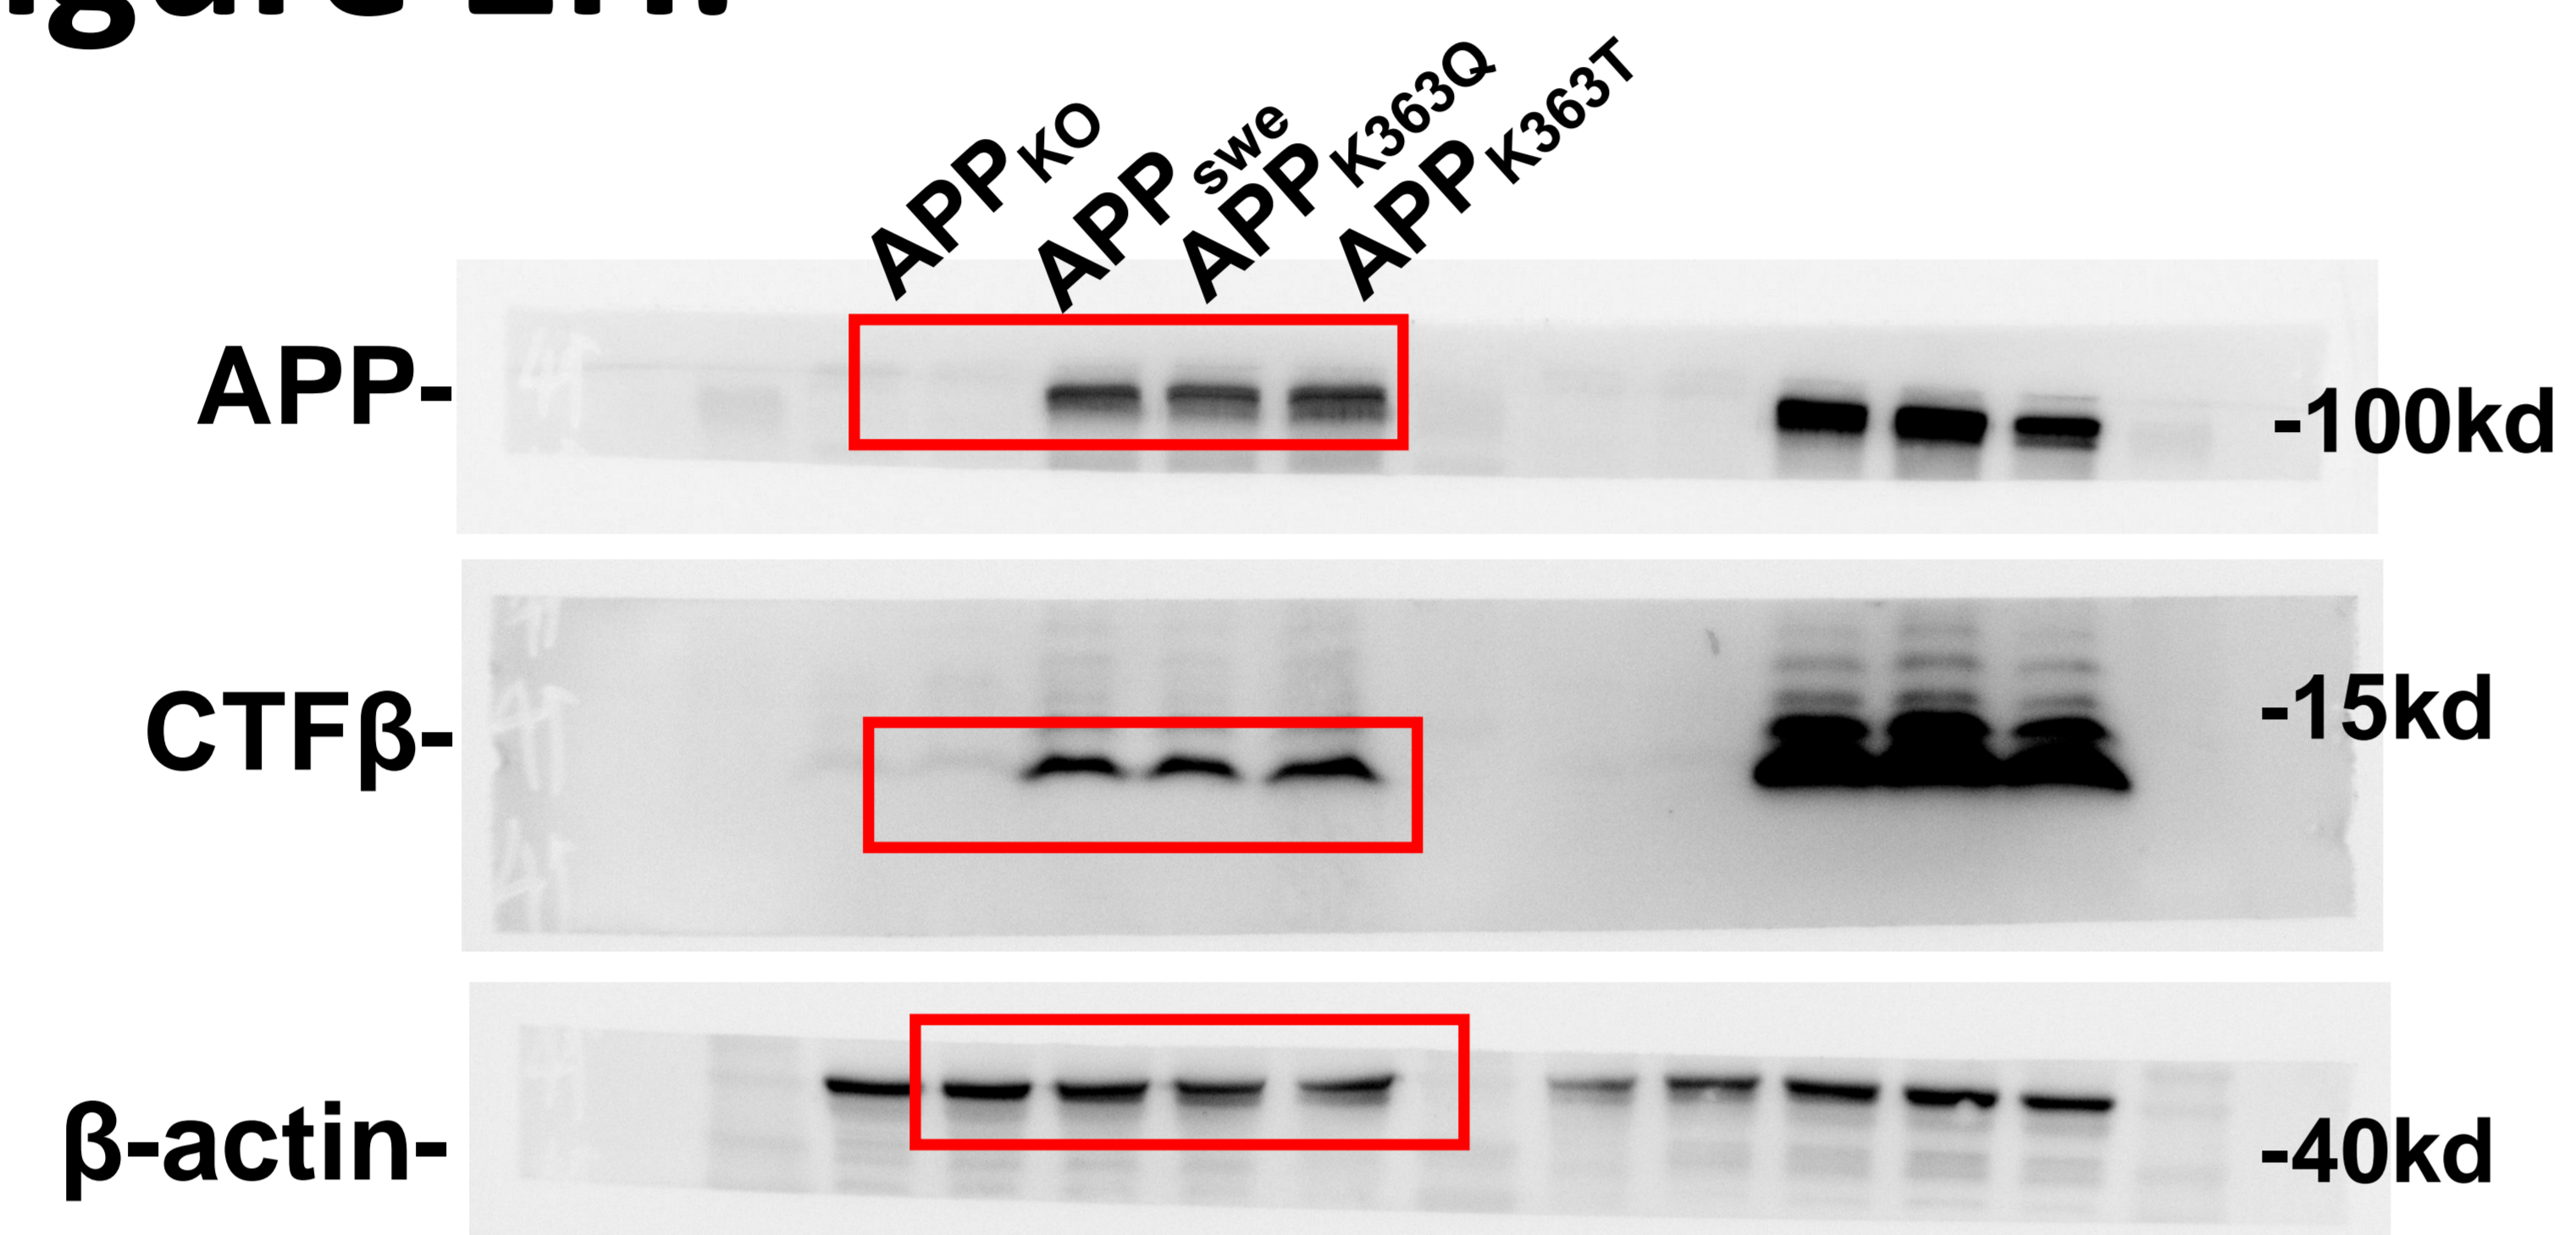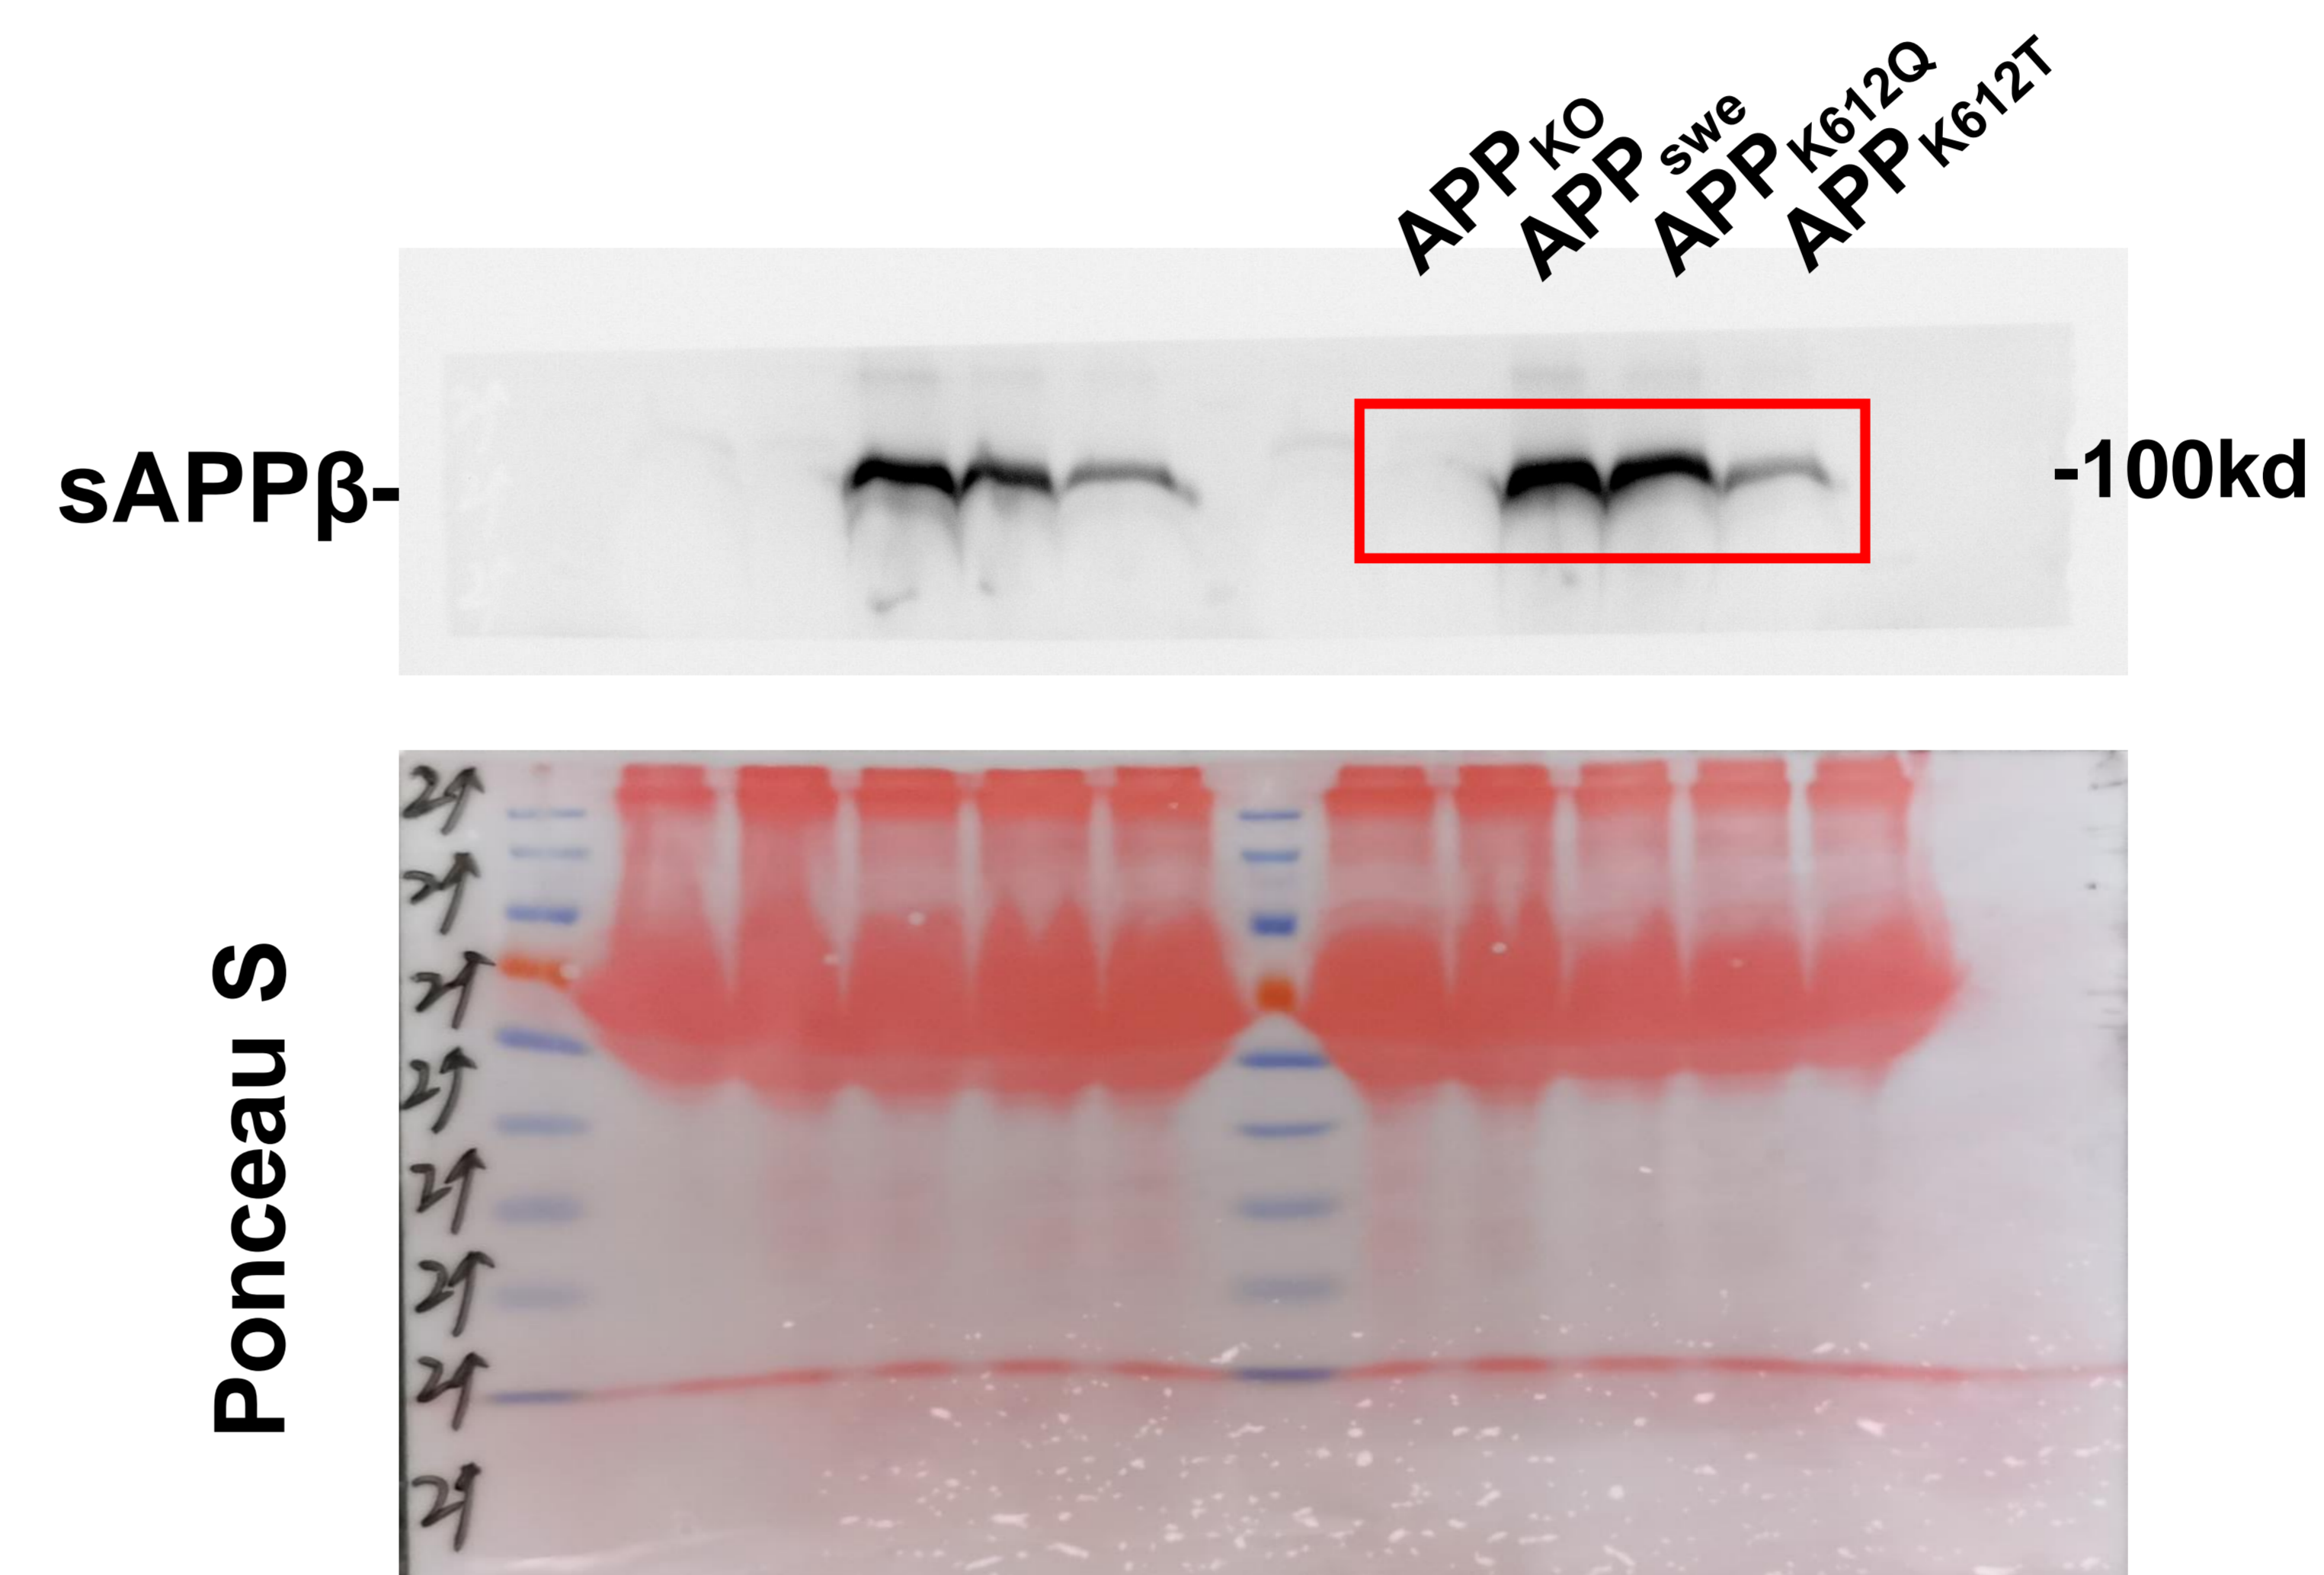

Figure 3D.

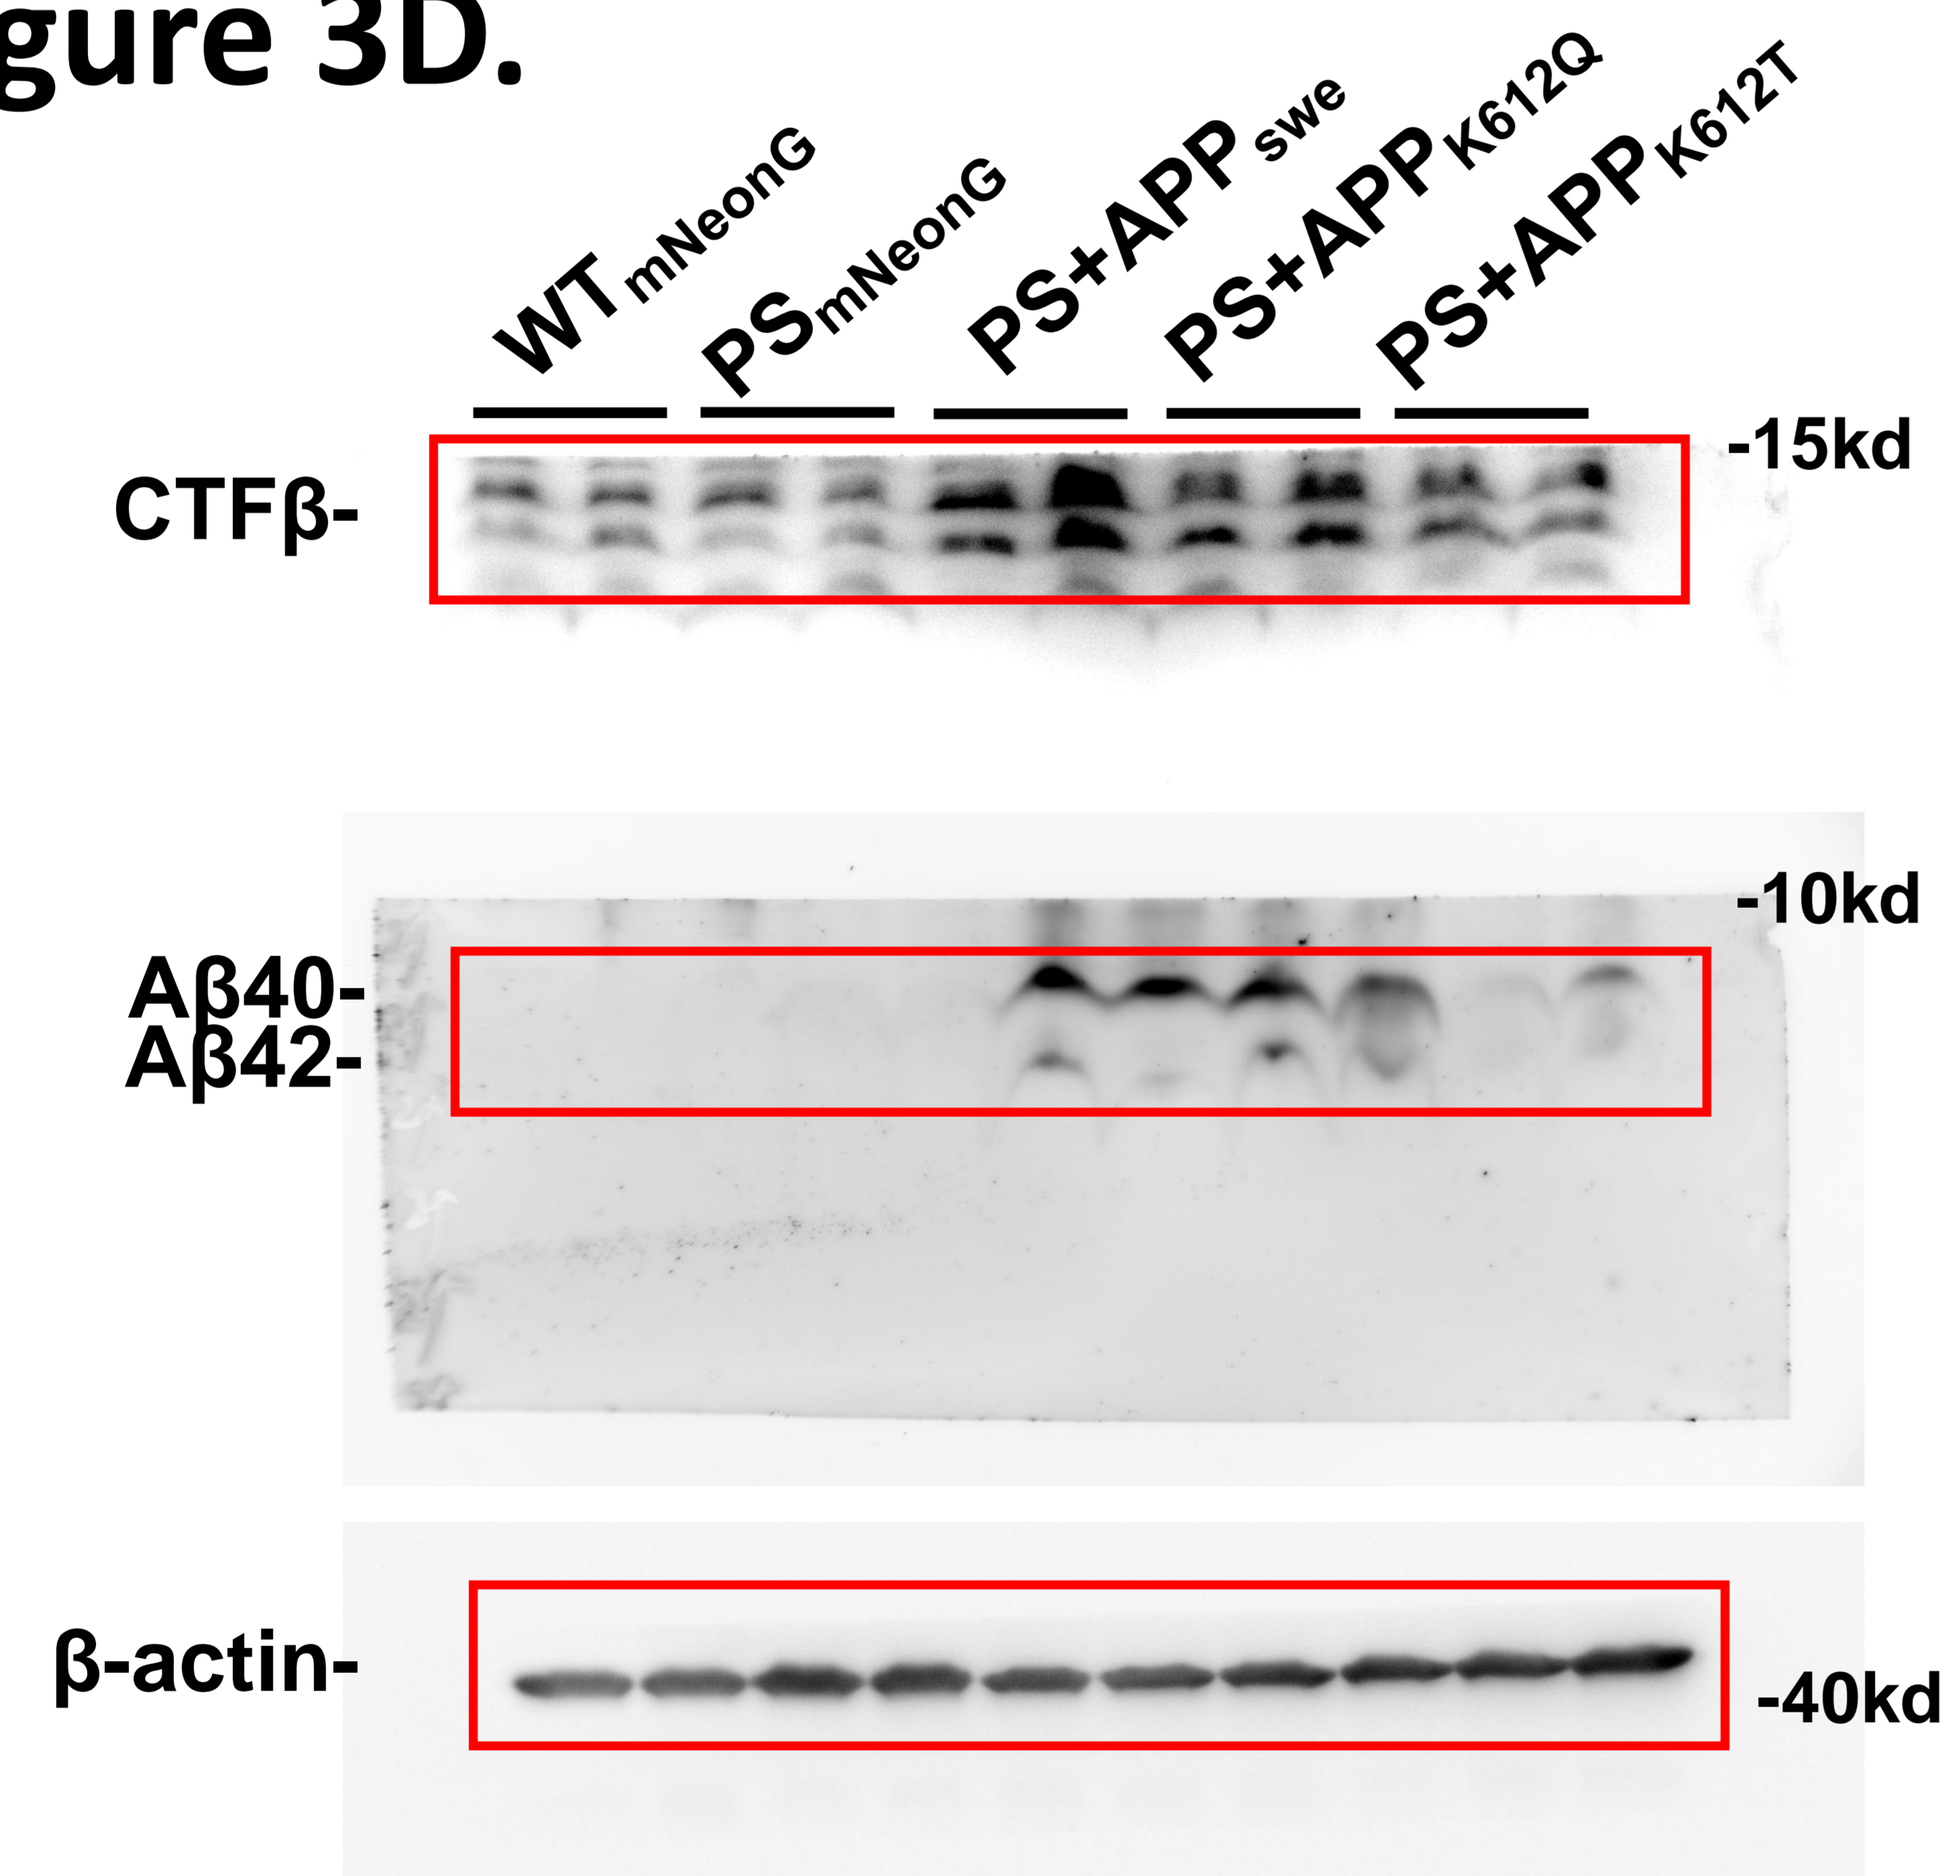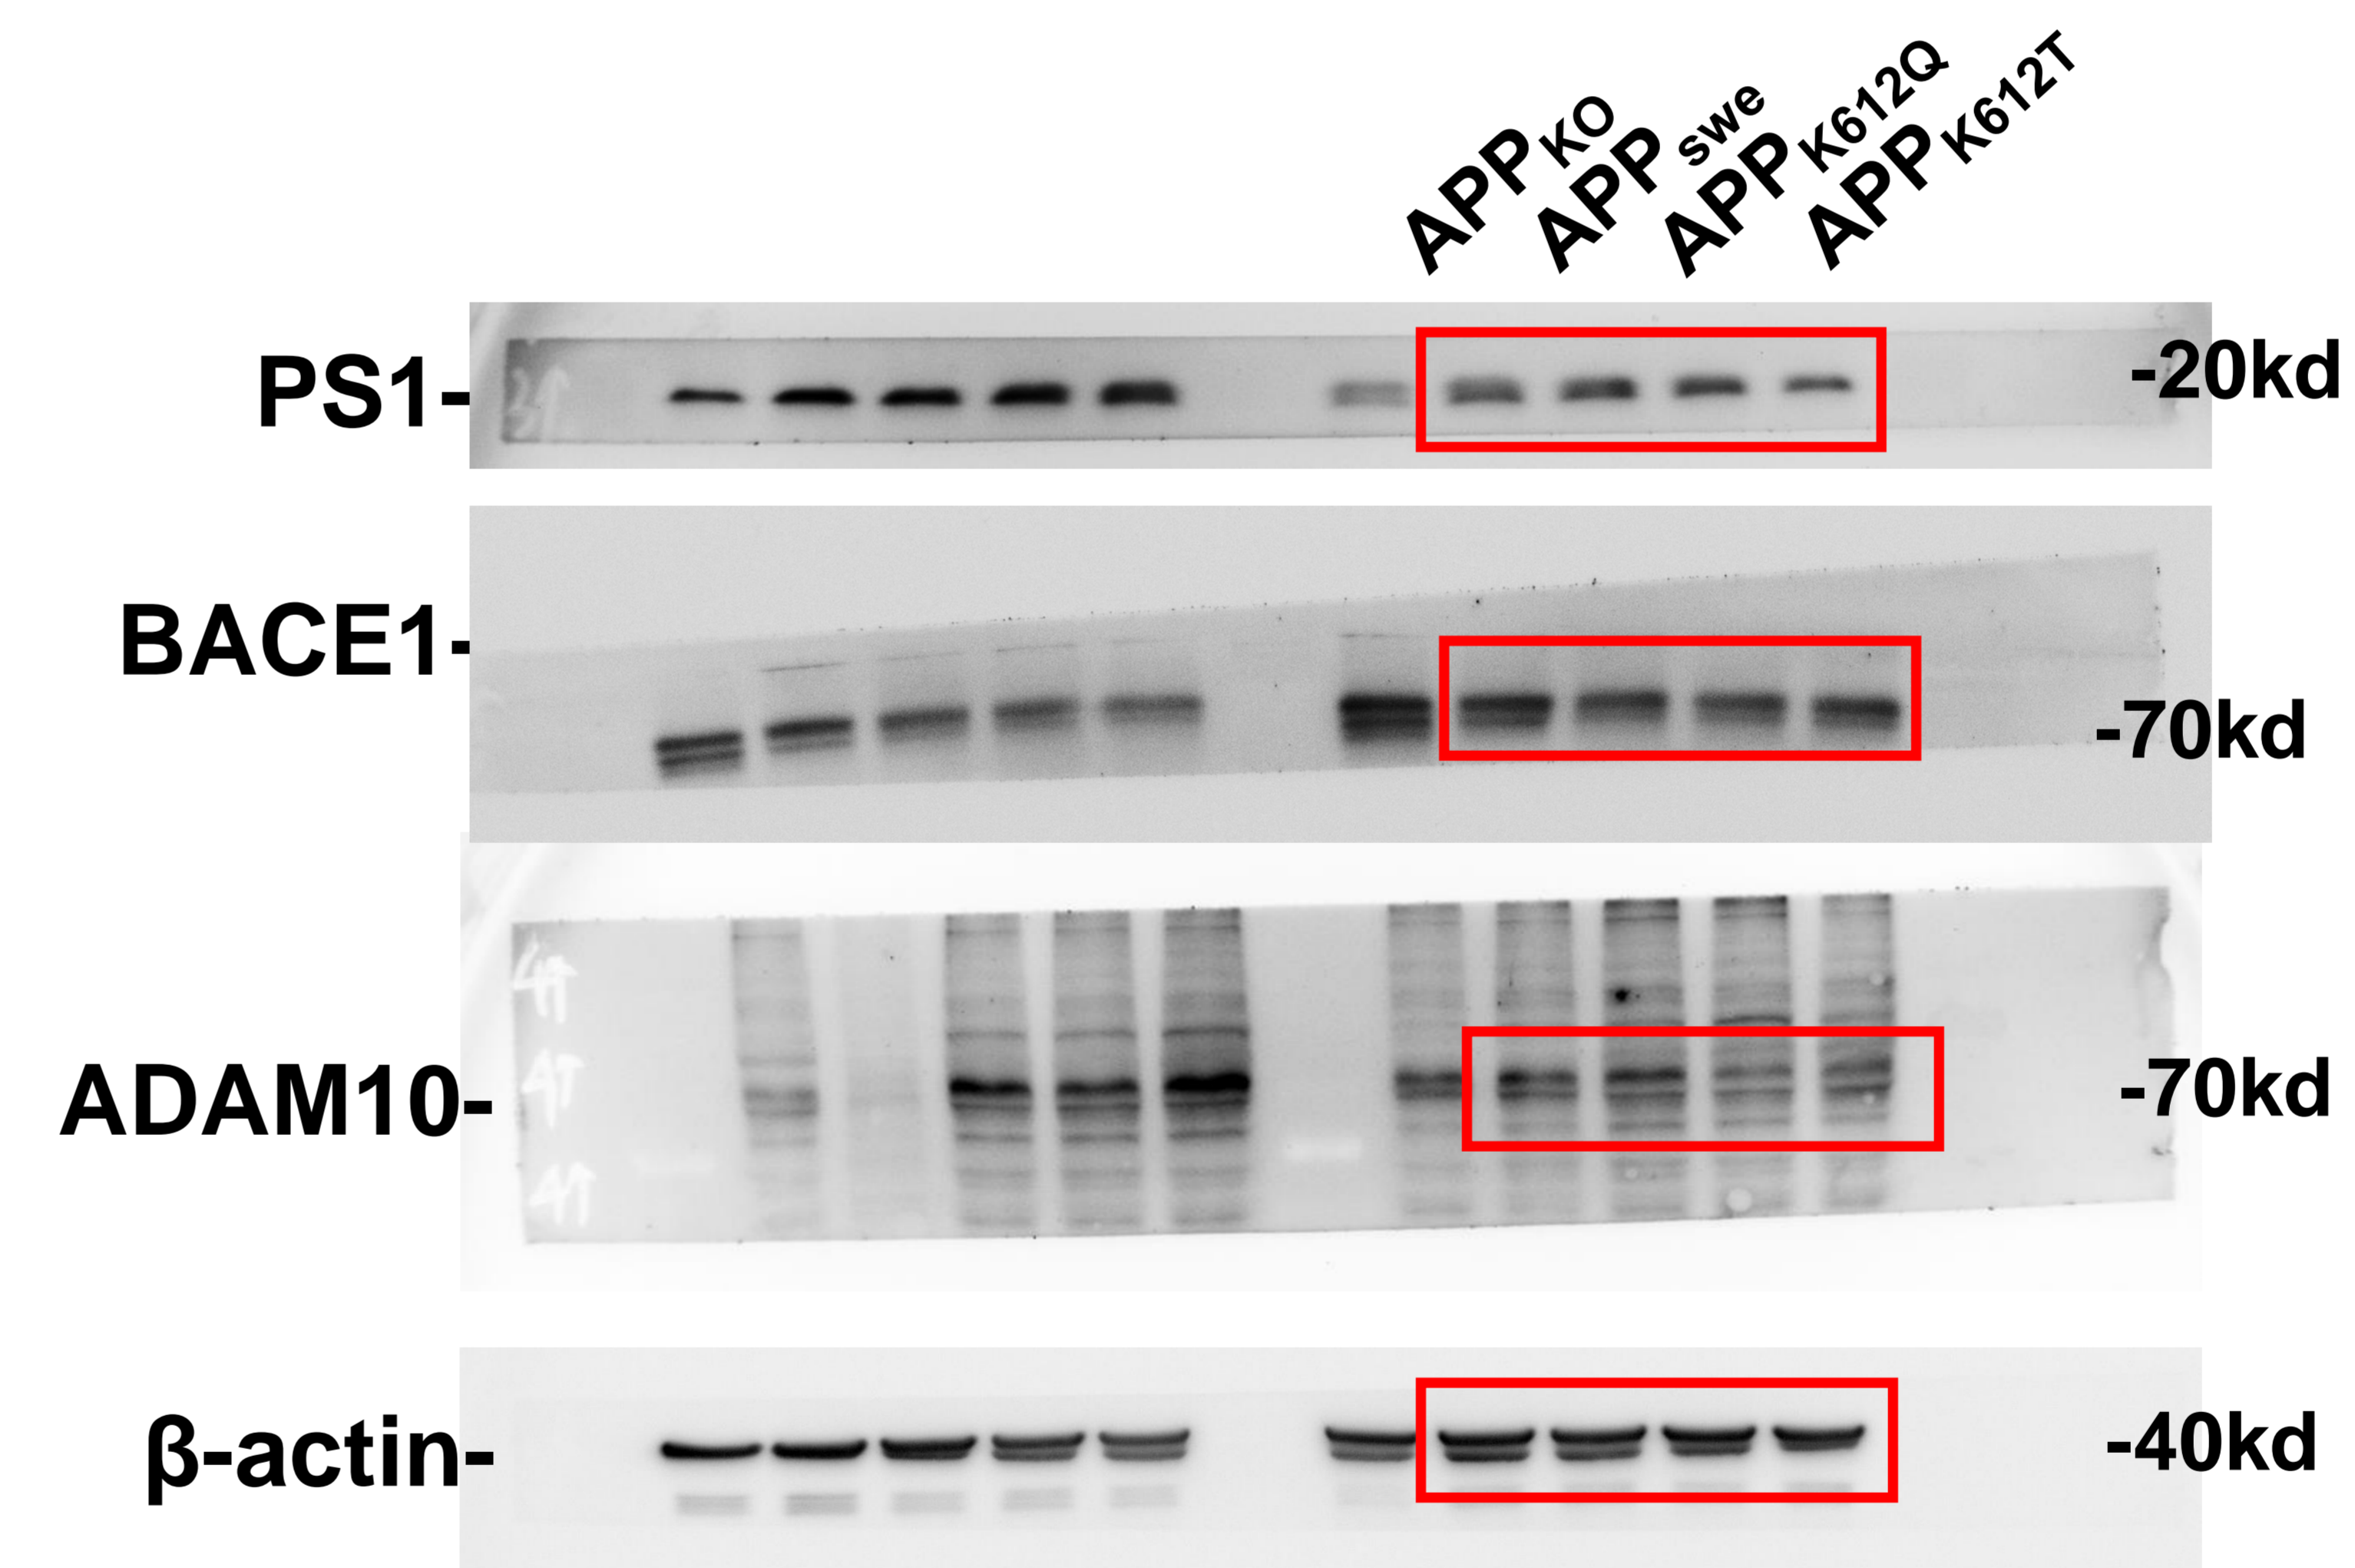

**Figure 6A**

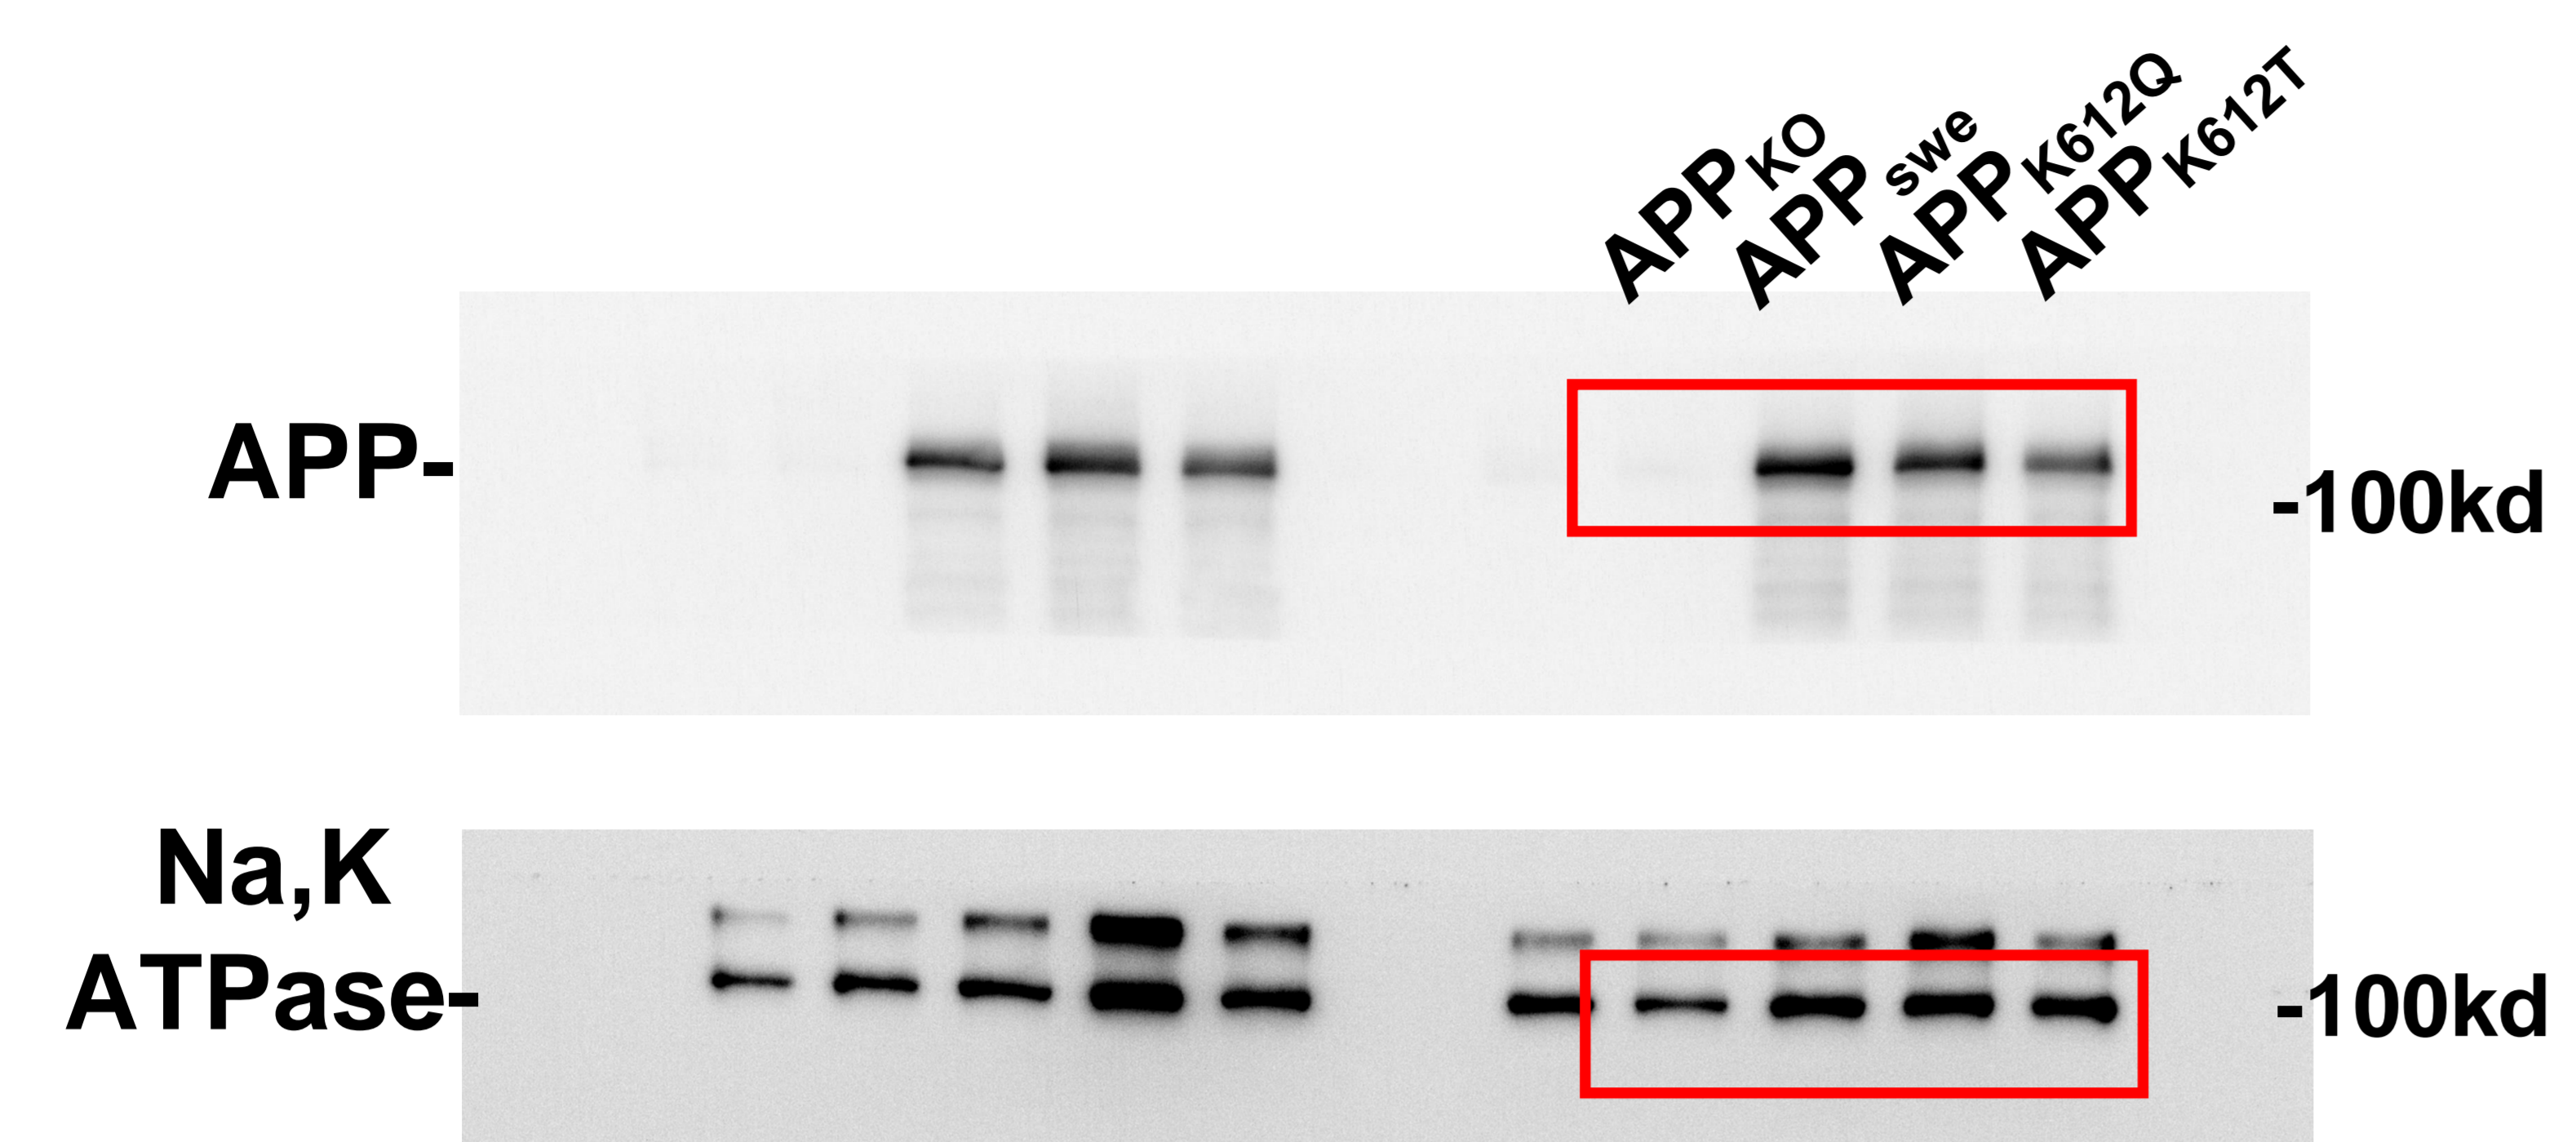

**Figure 6G**

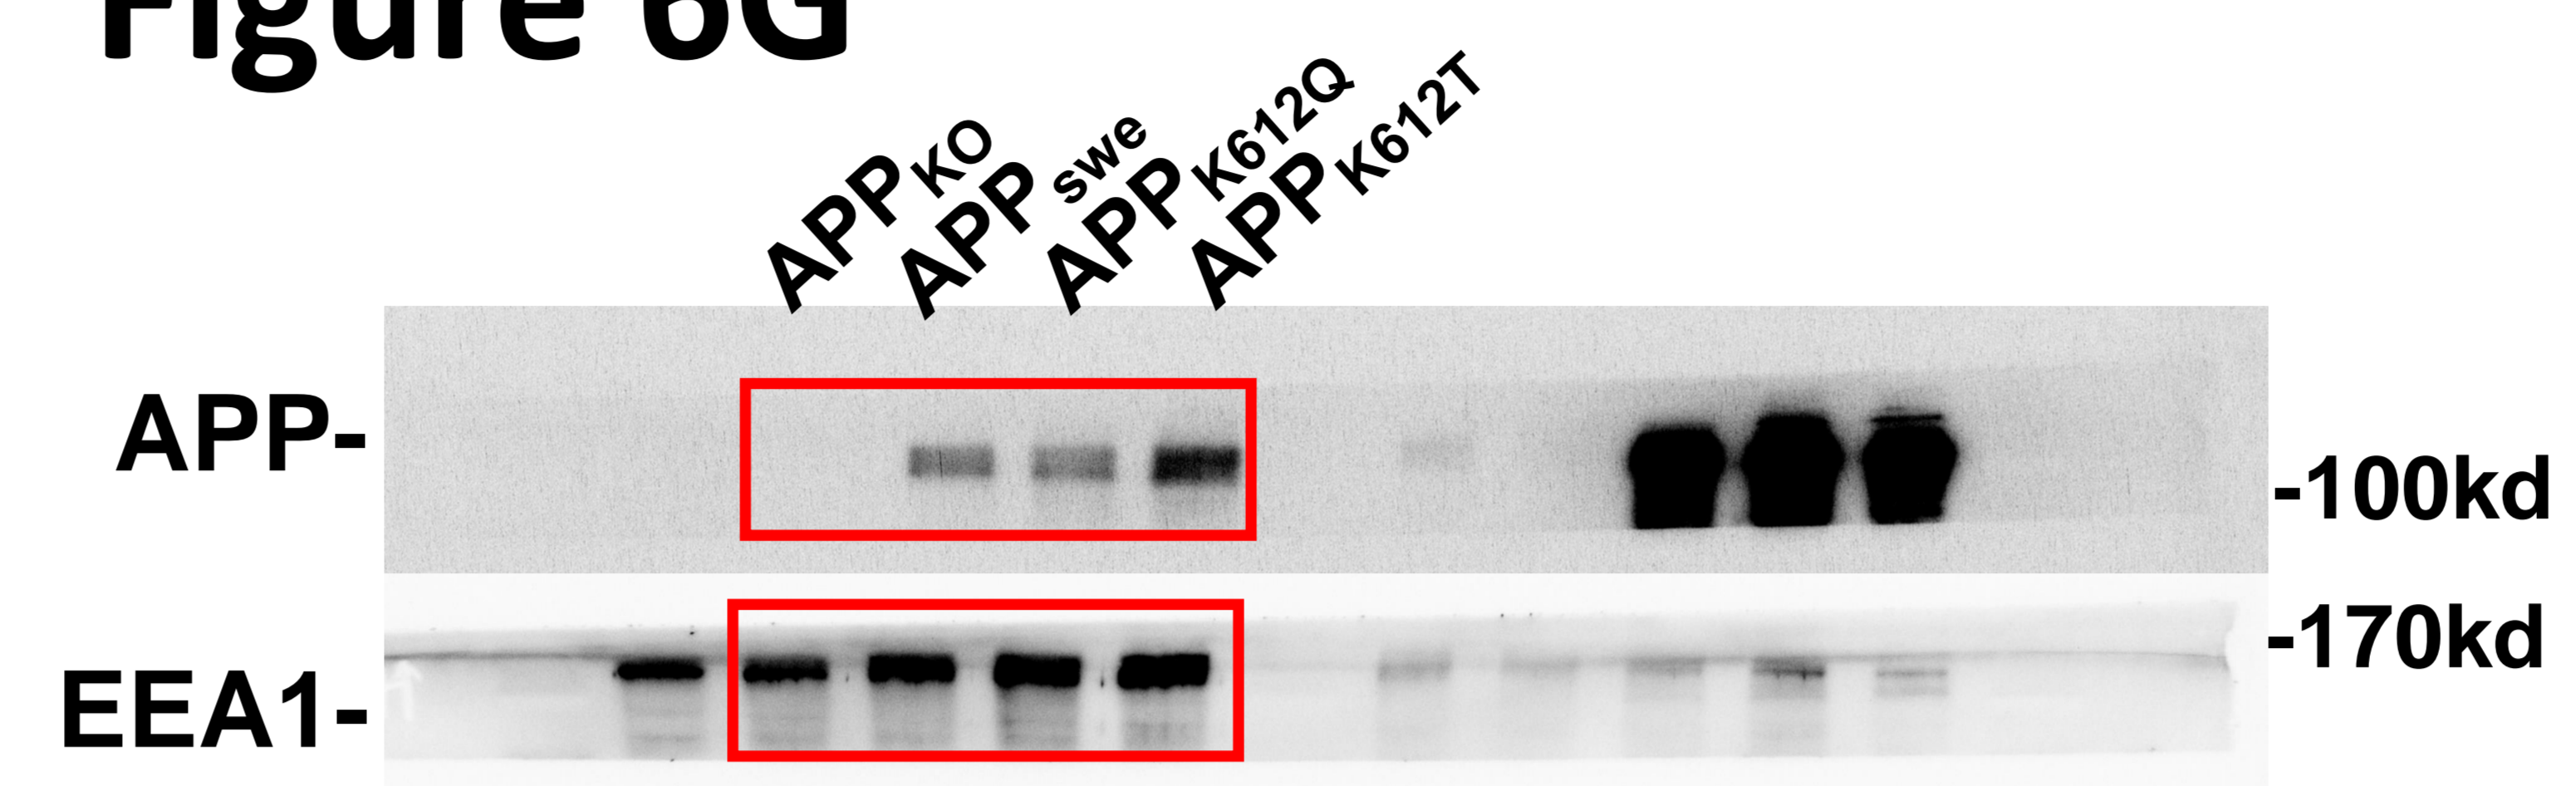

**Figure 6D**

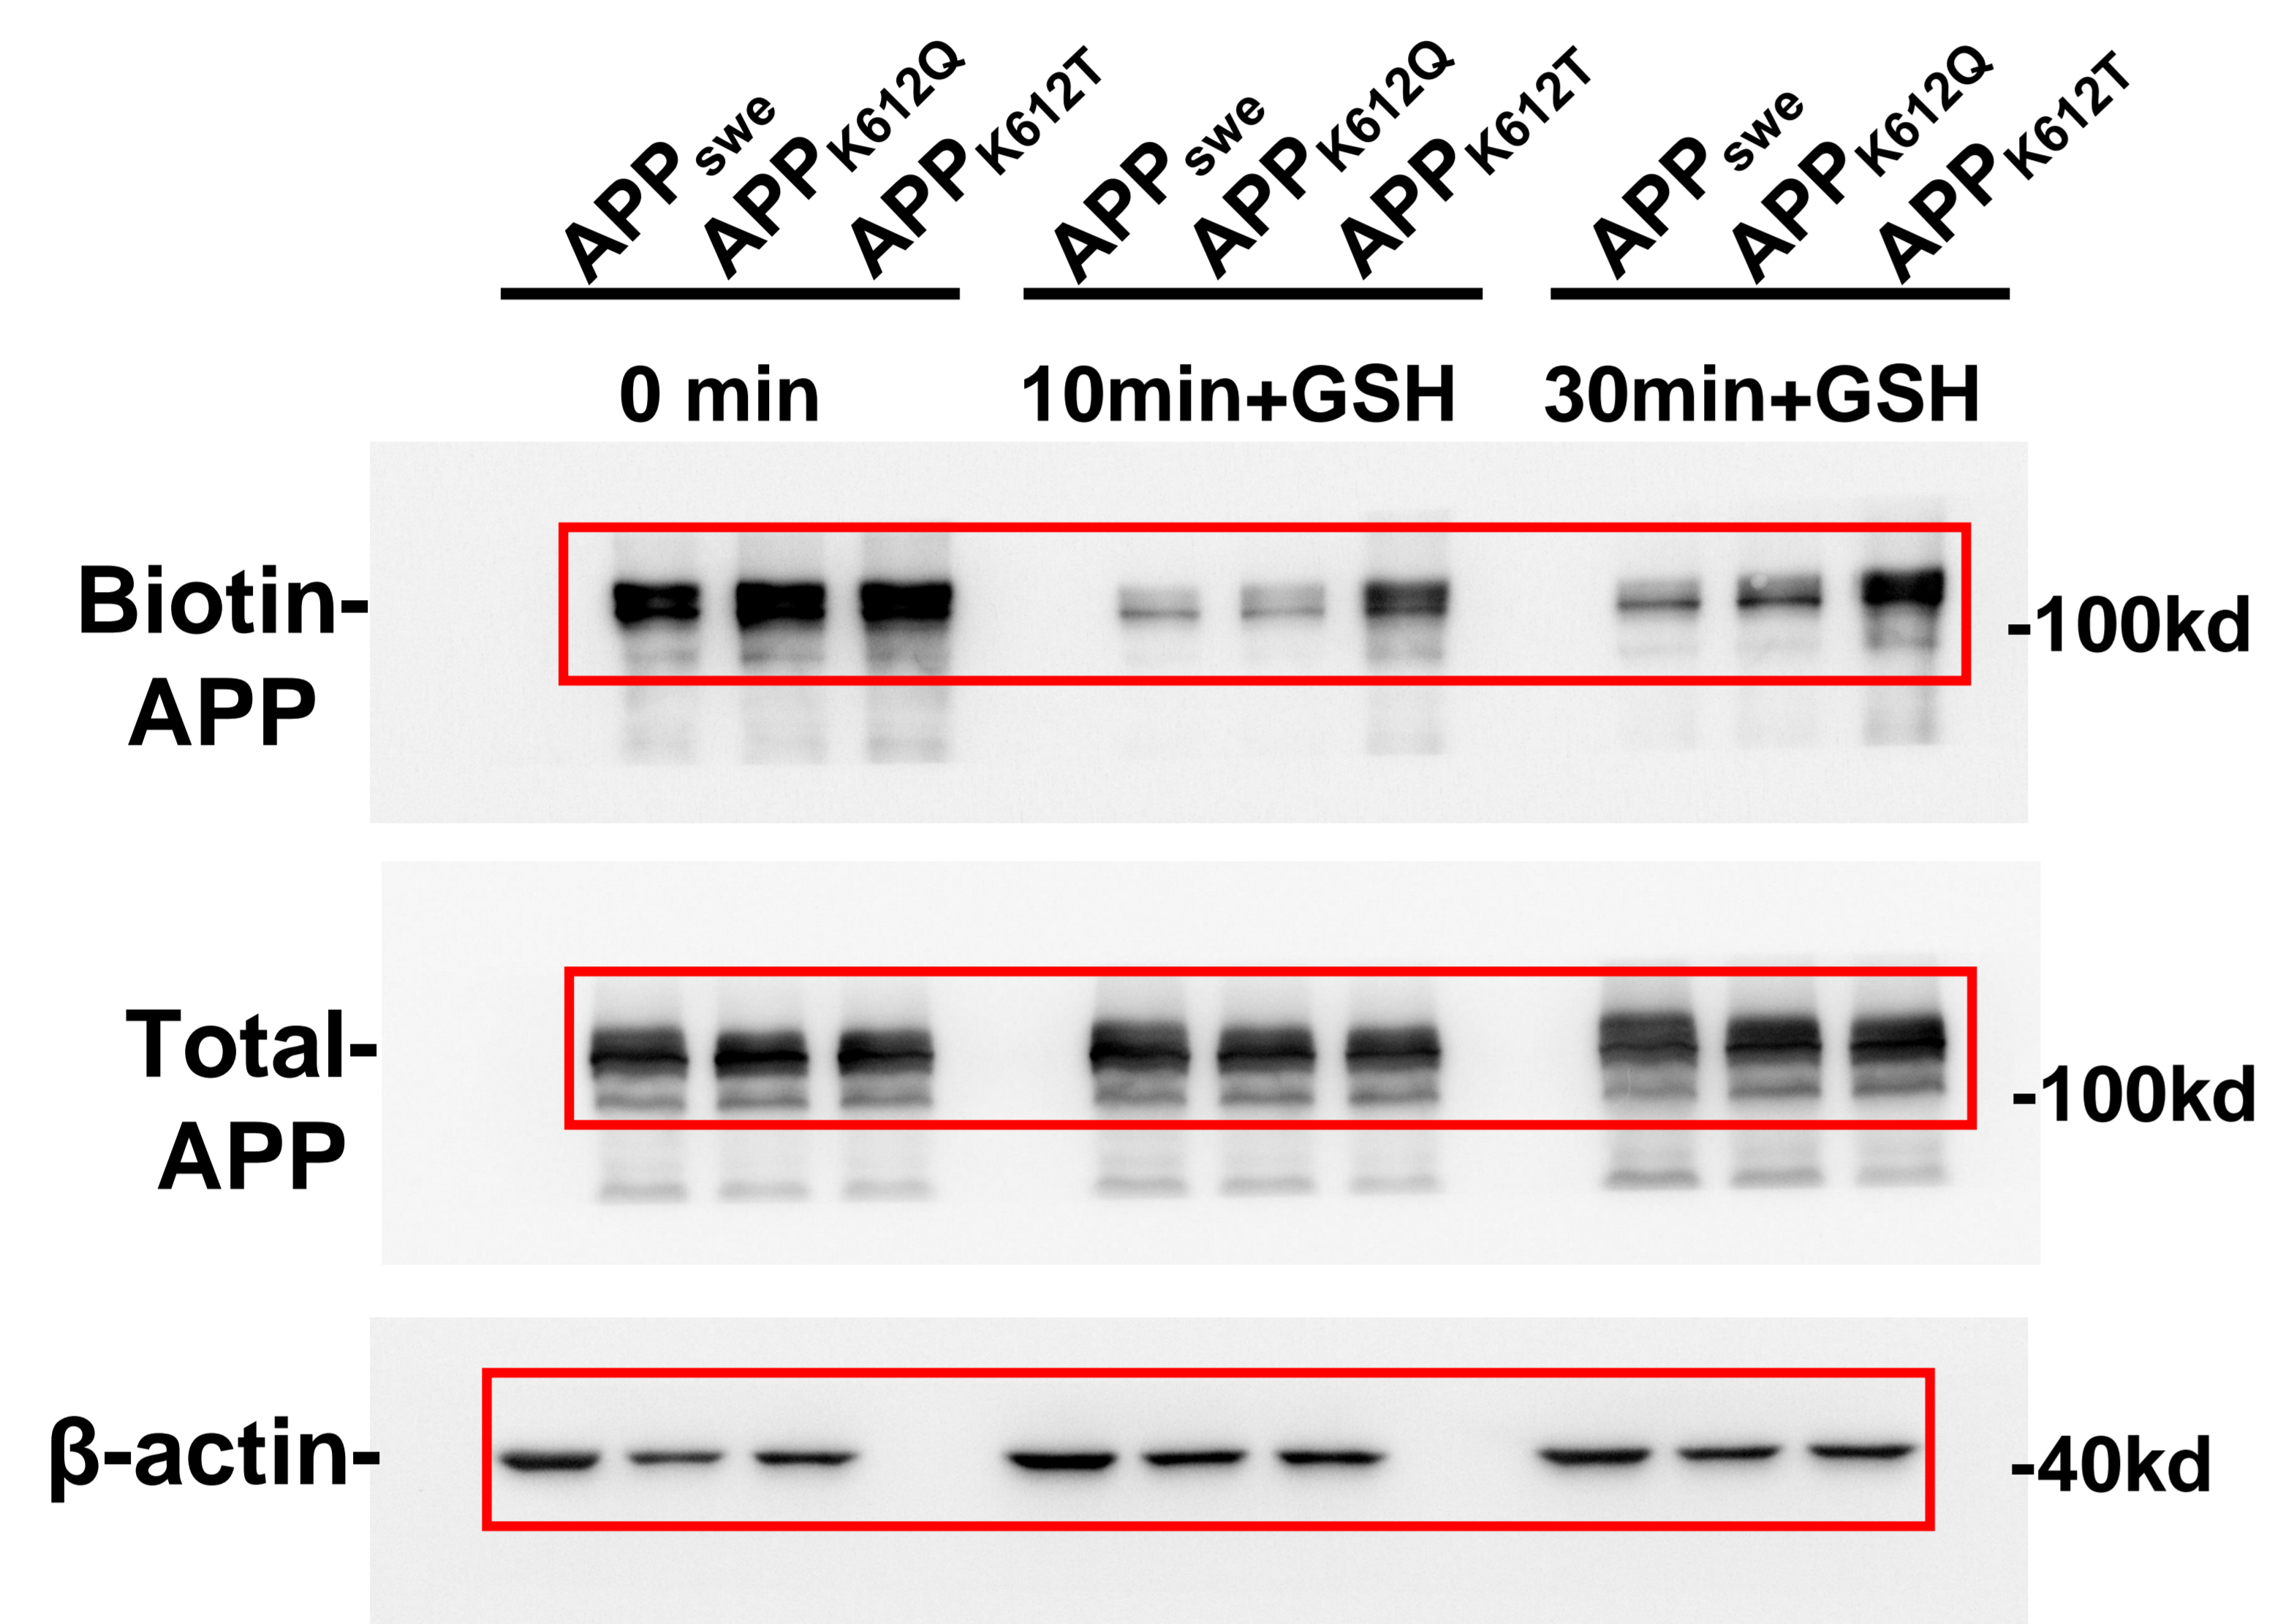

**Figure 6H**

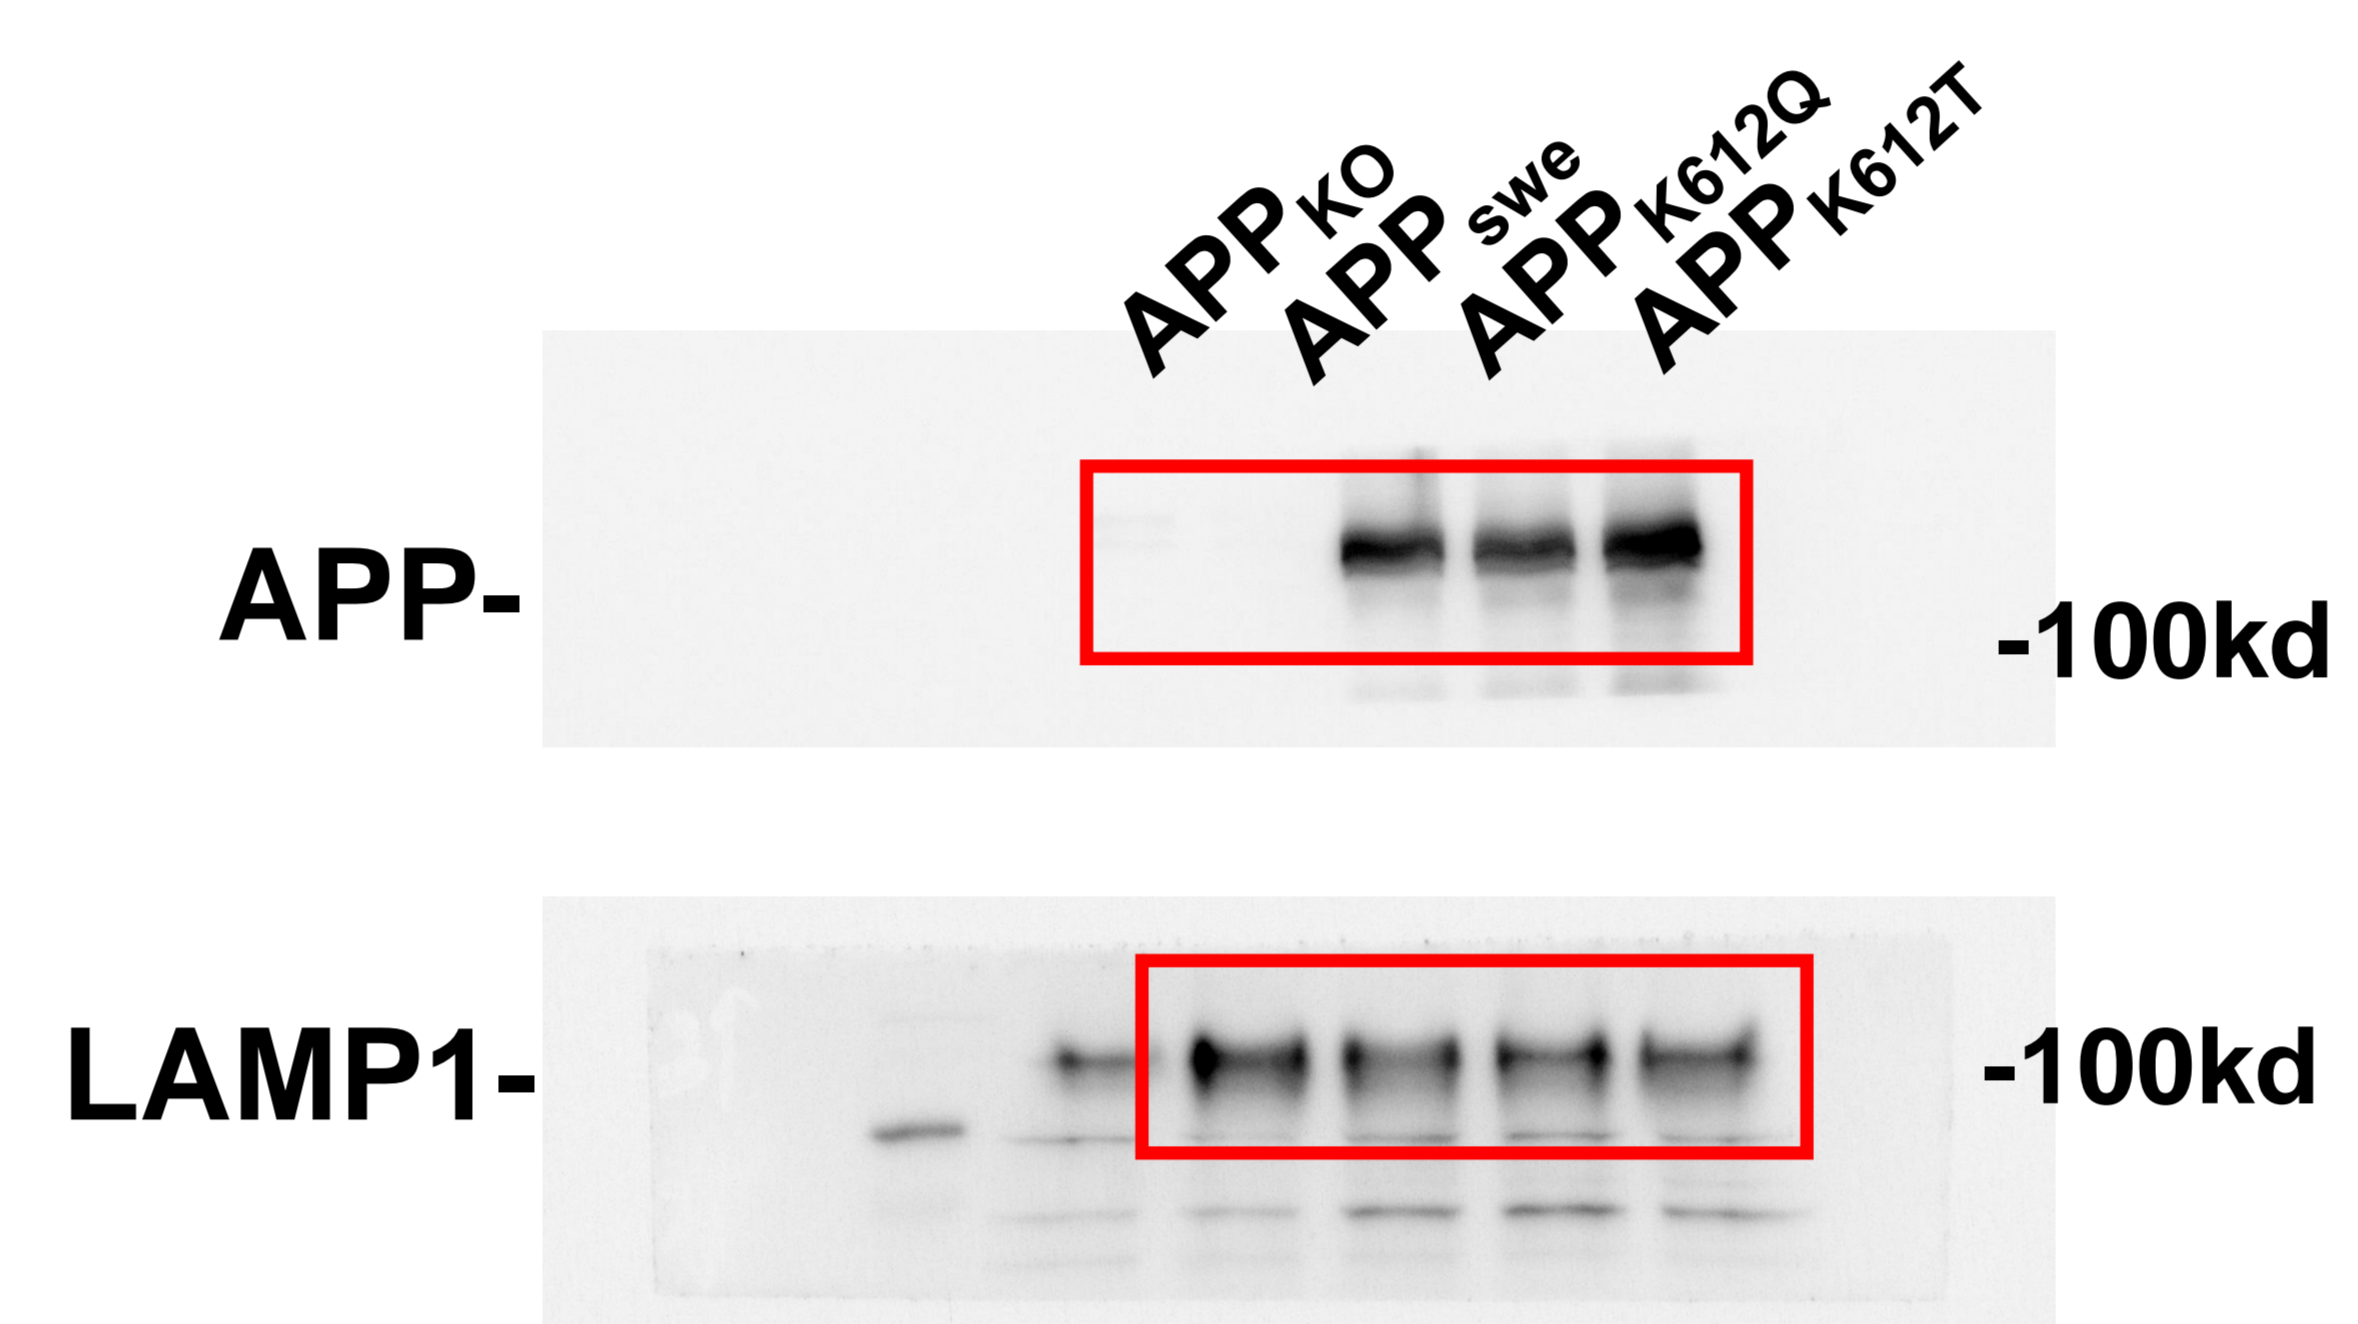

**Figure 7A.**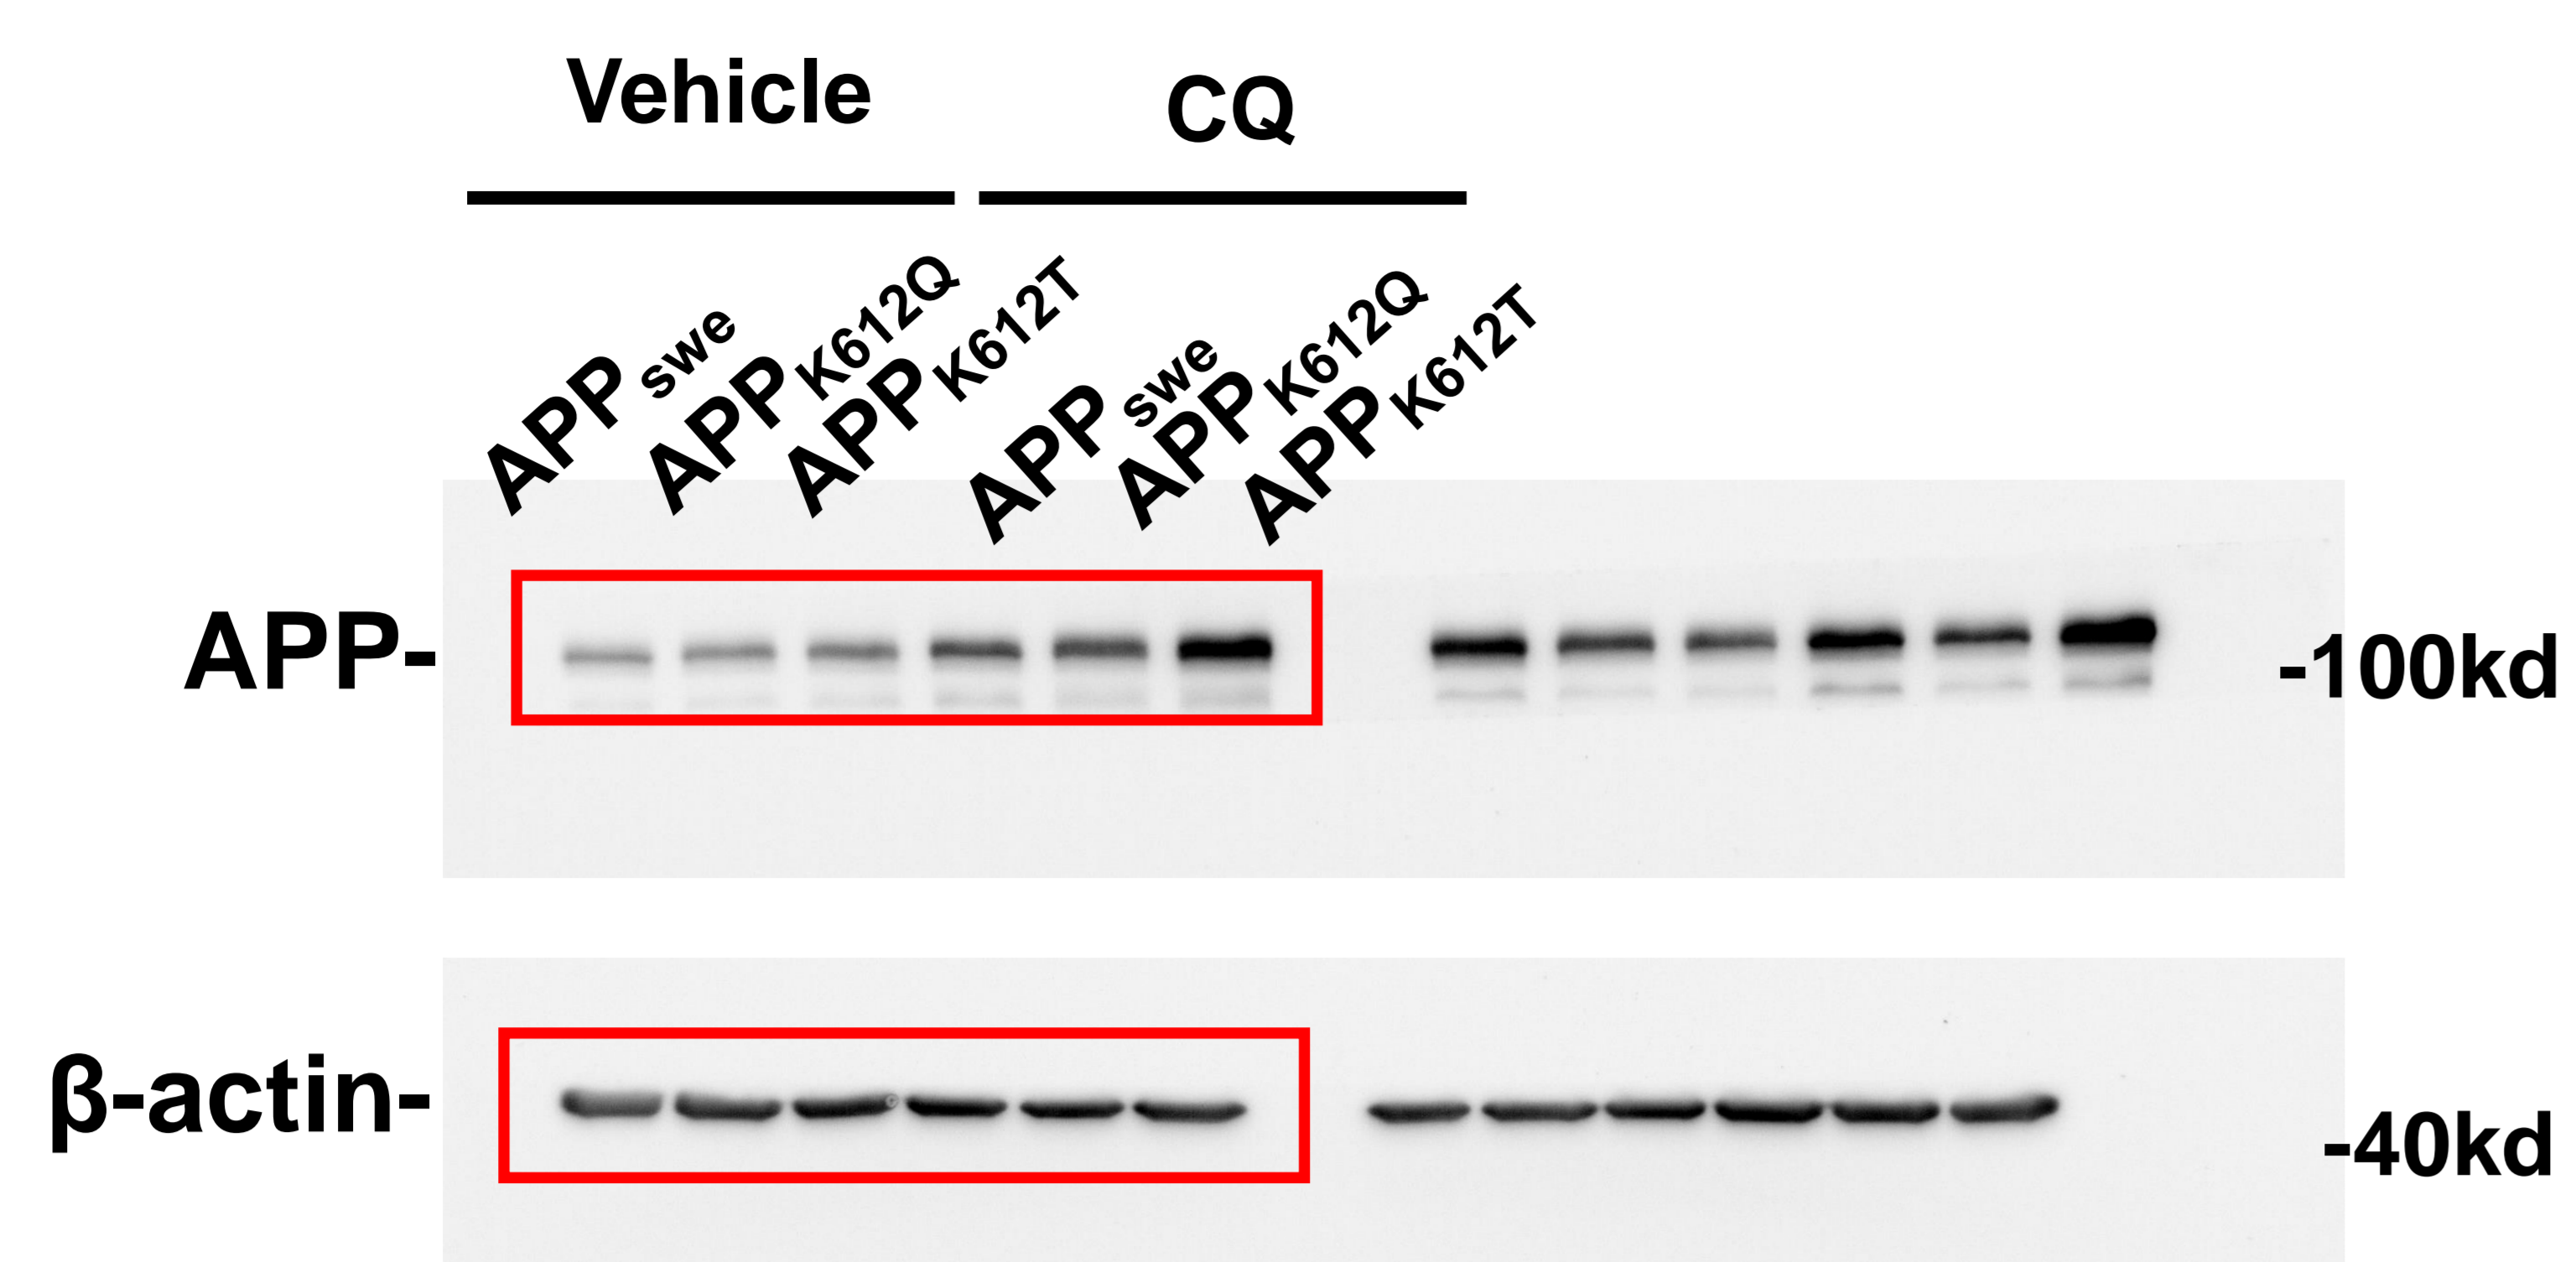**Figure 7D.**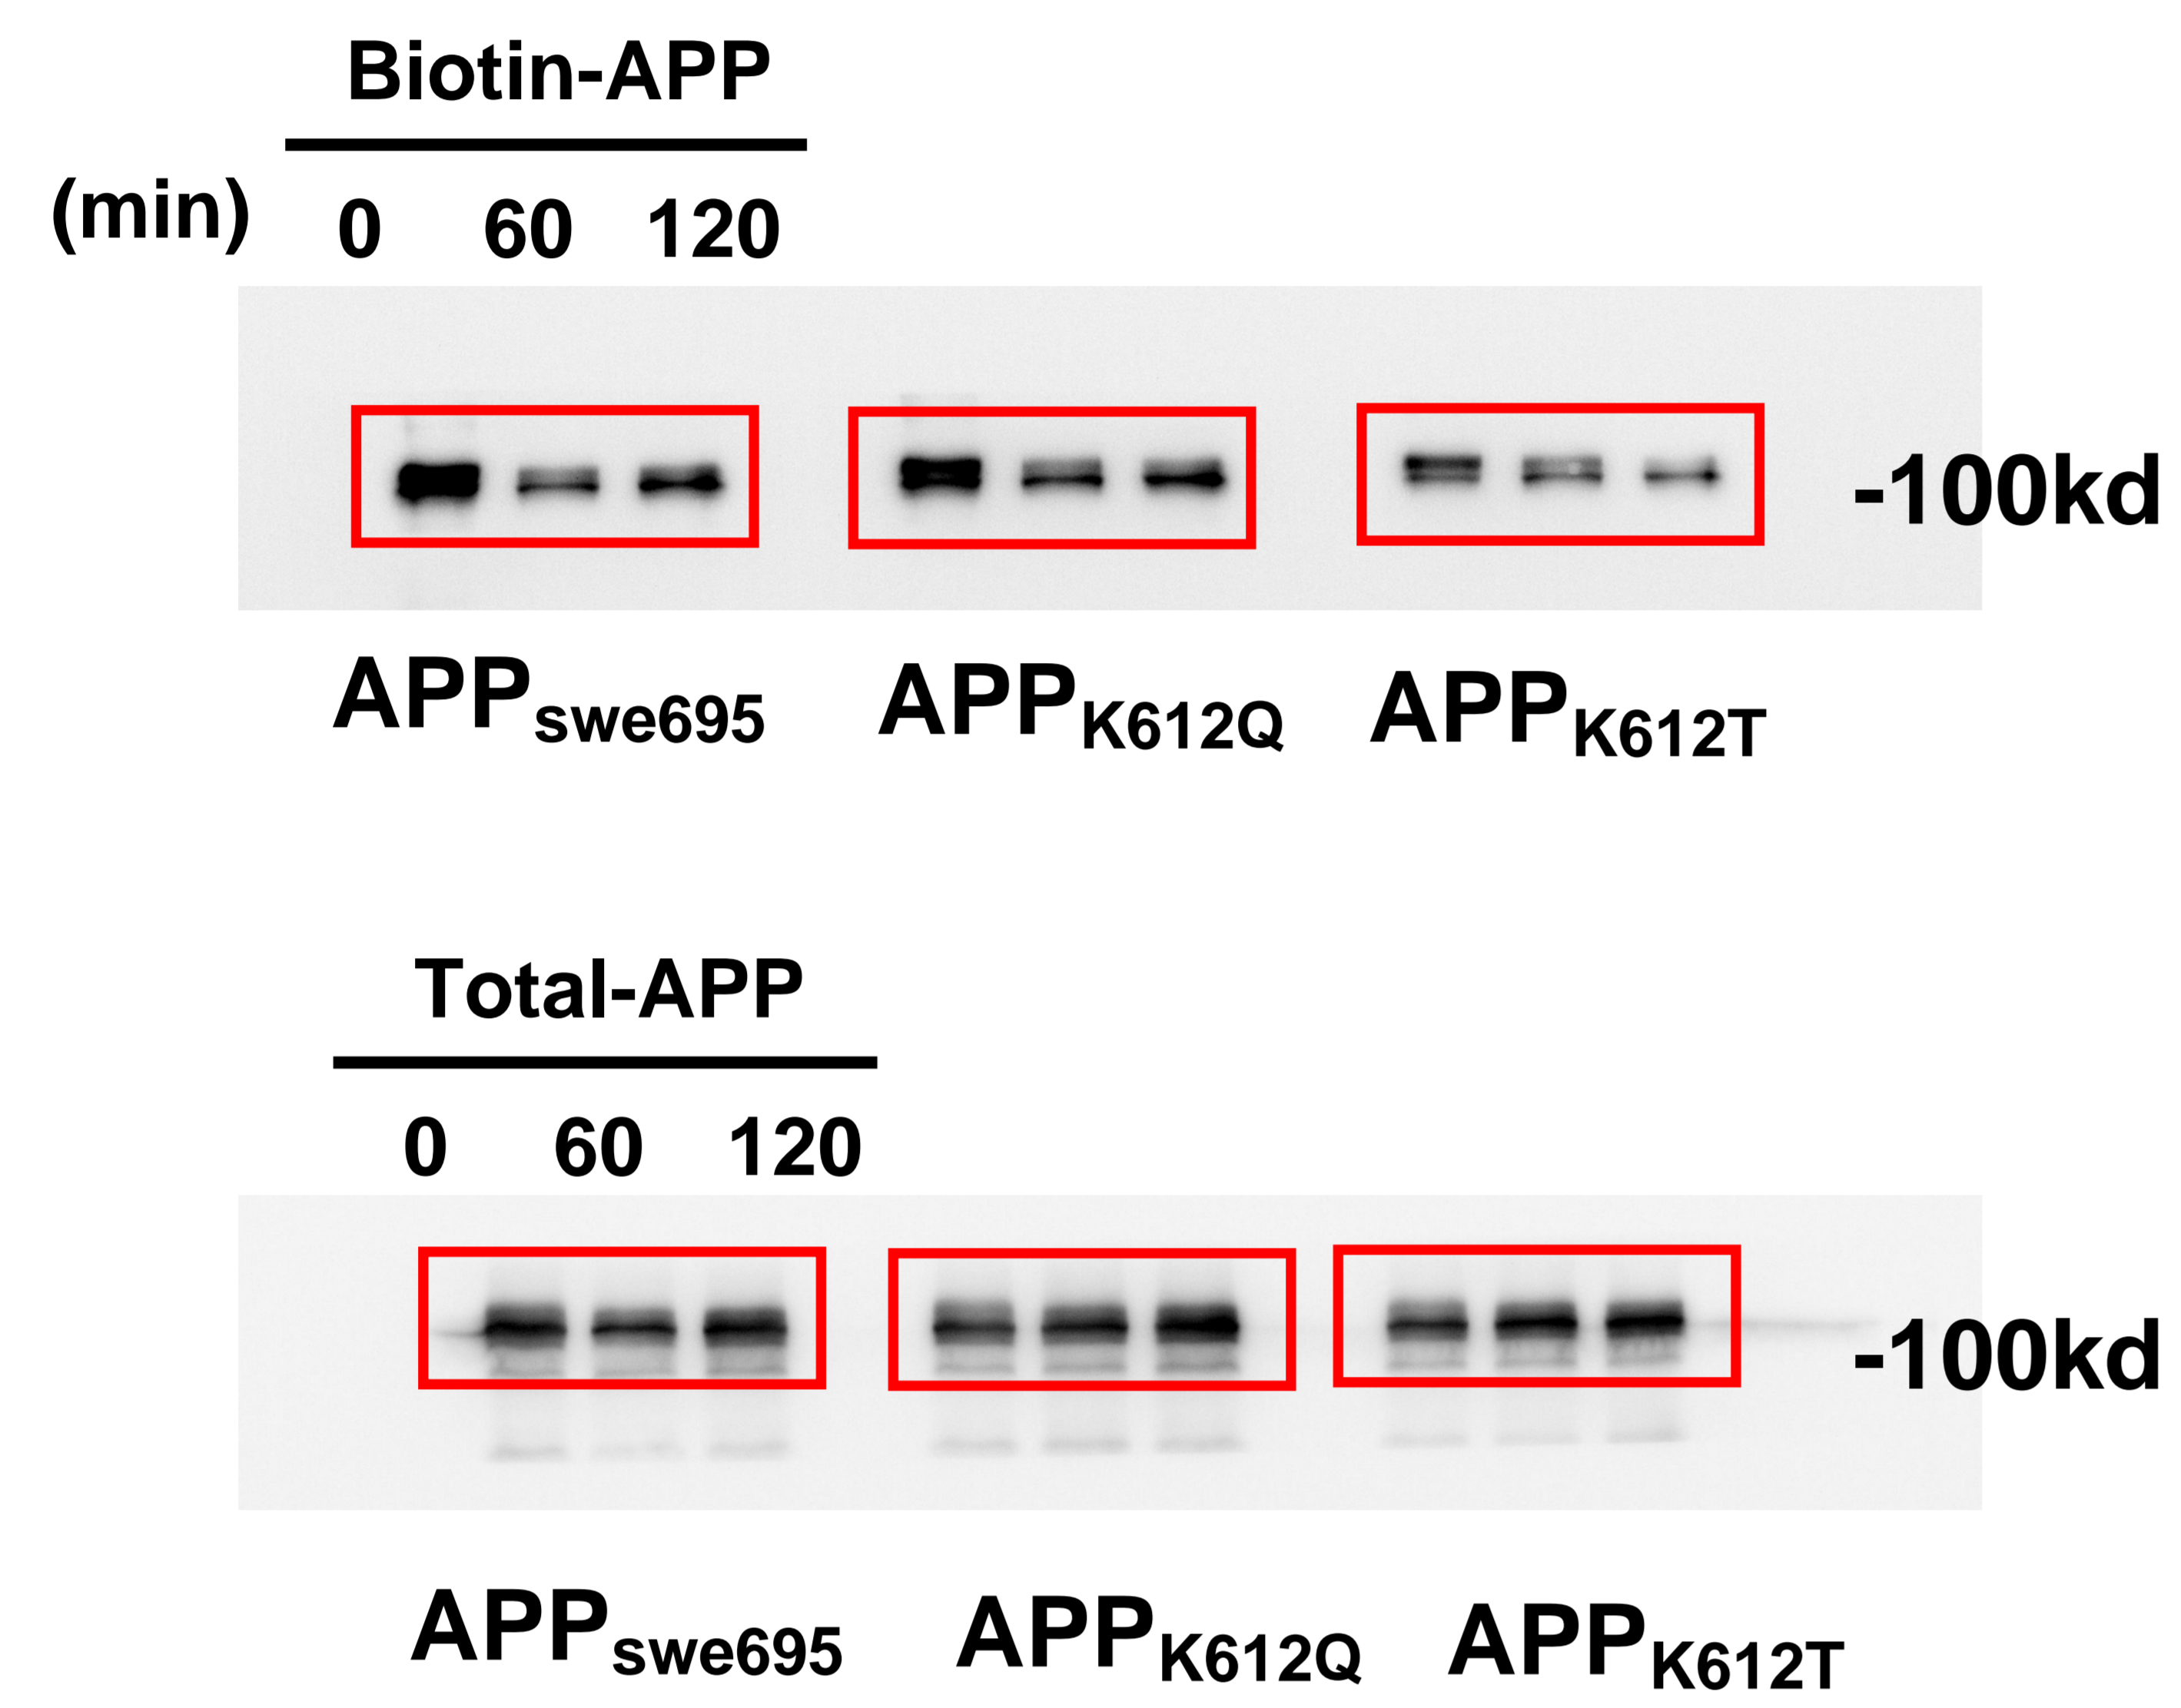**Figure 7E.**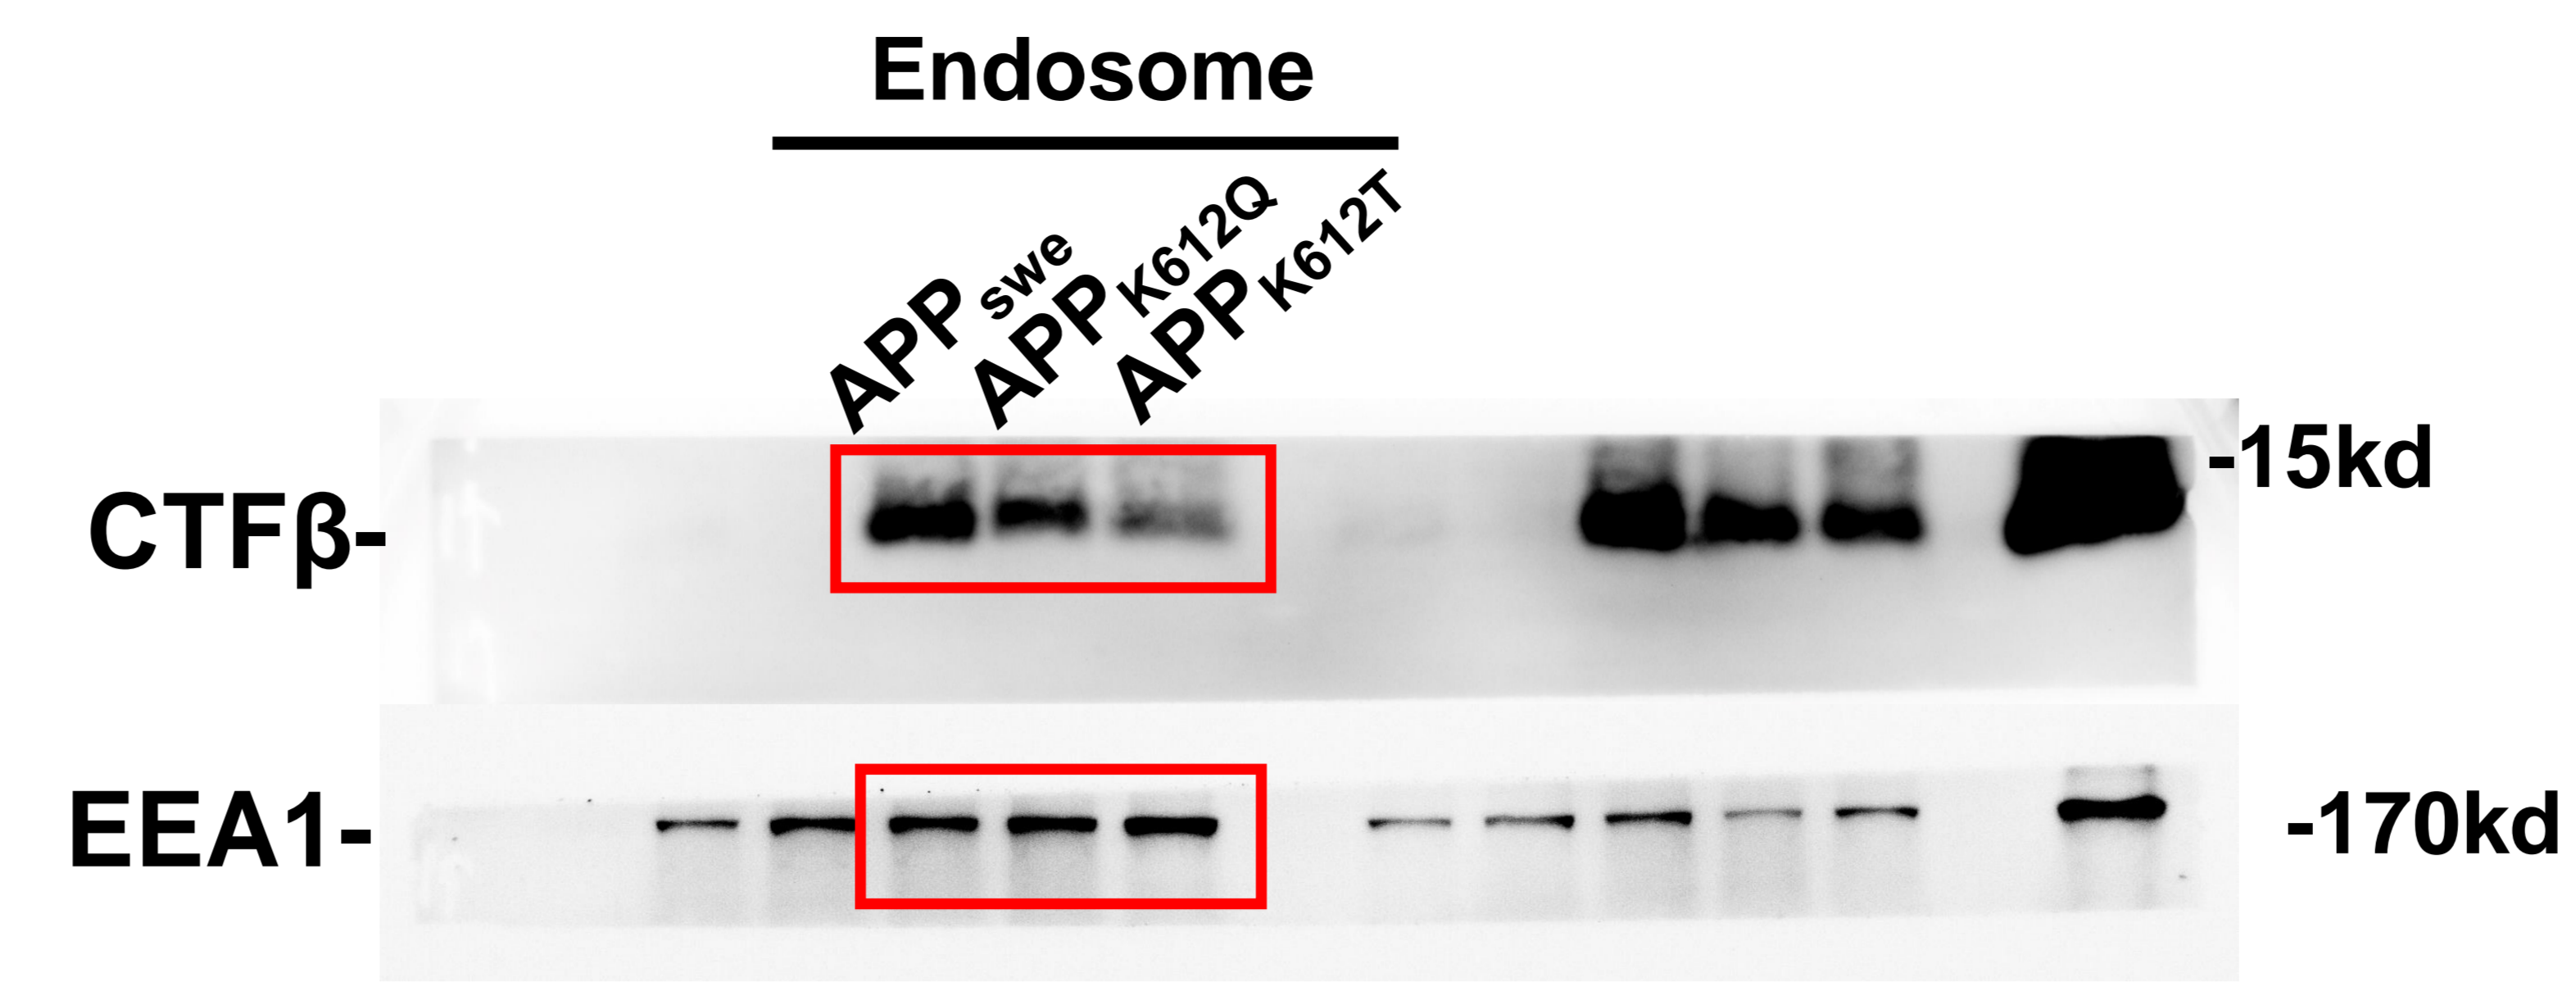**Figure 7F.**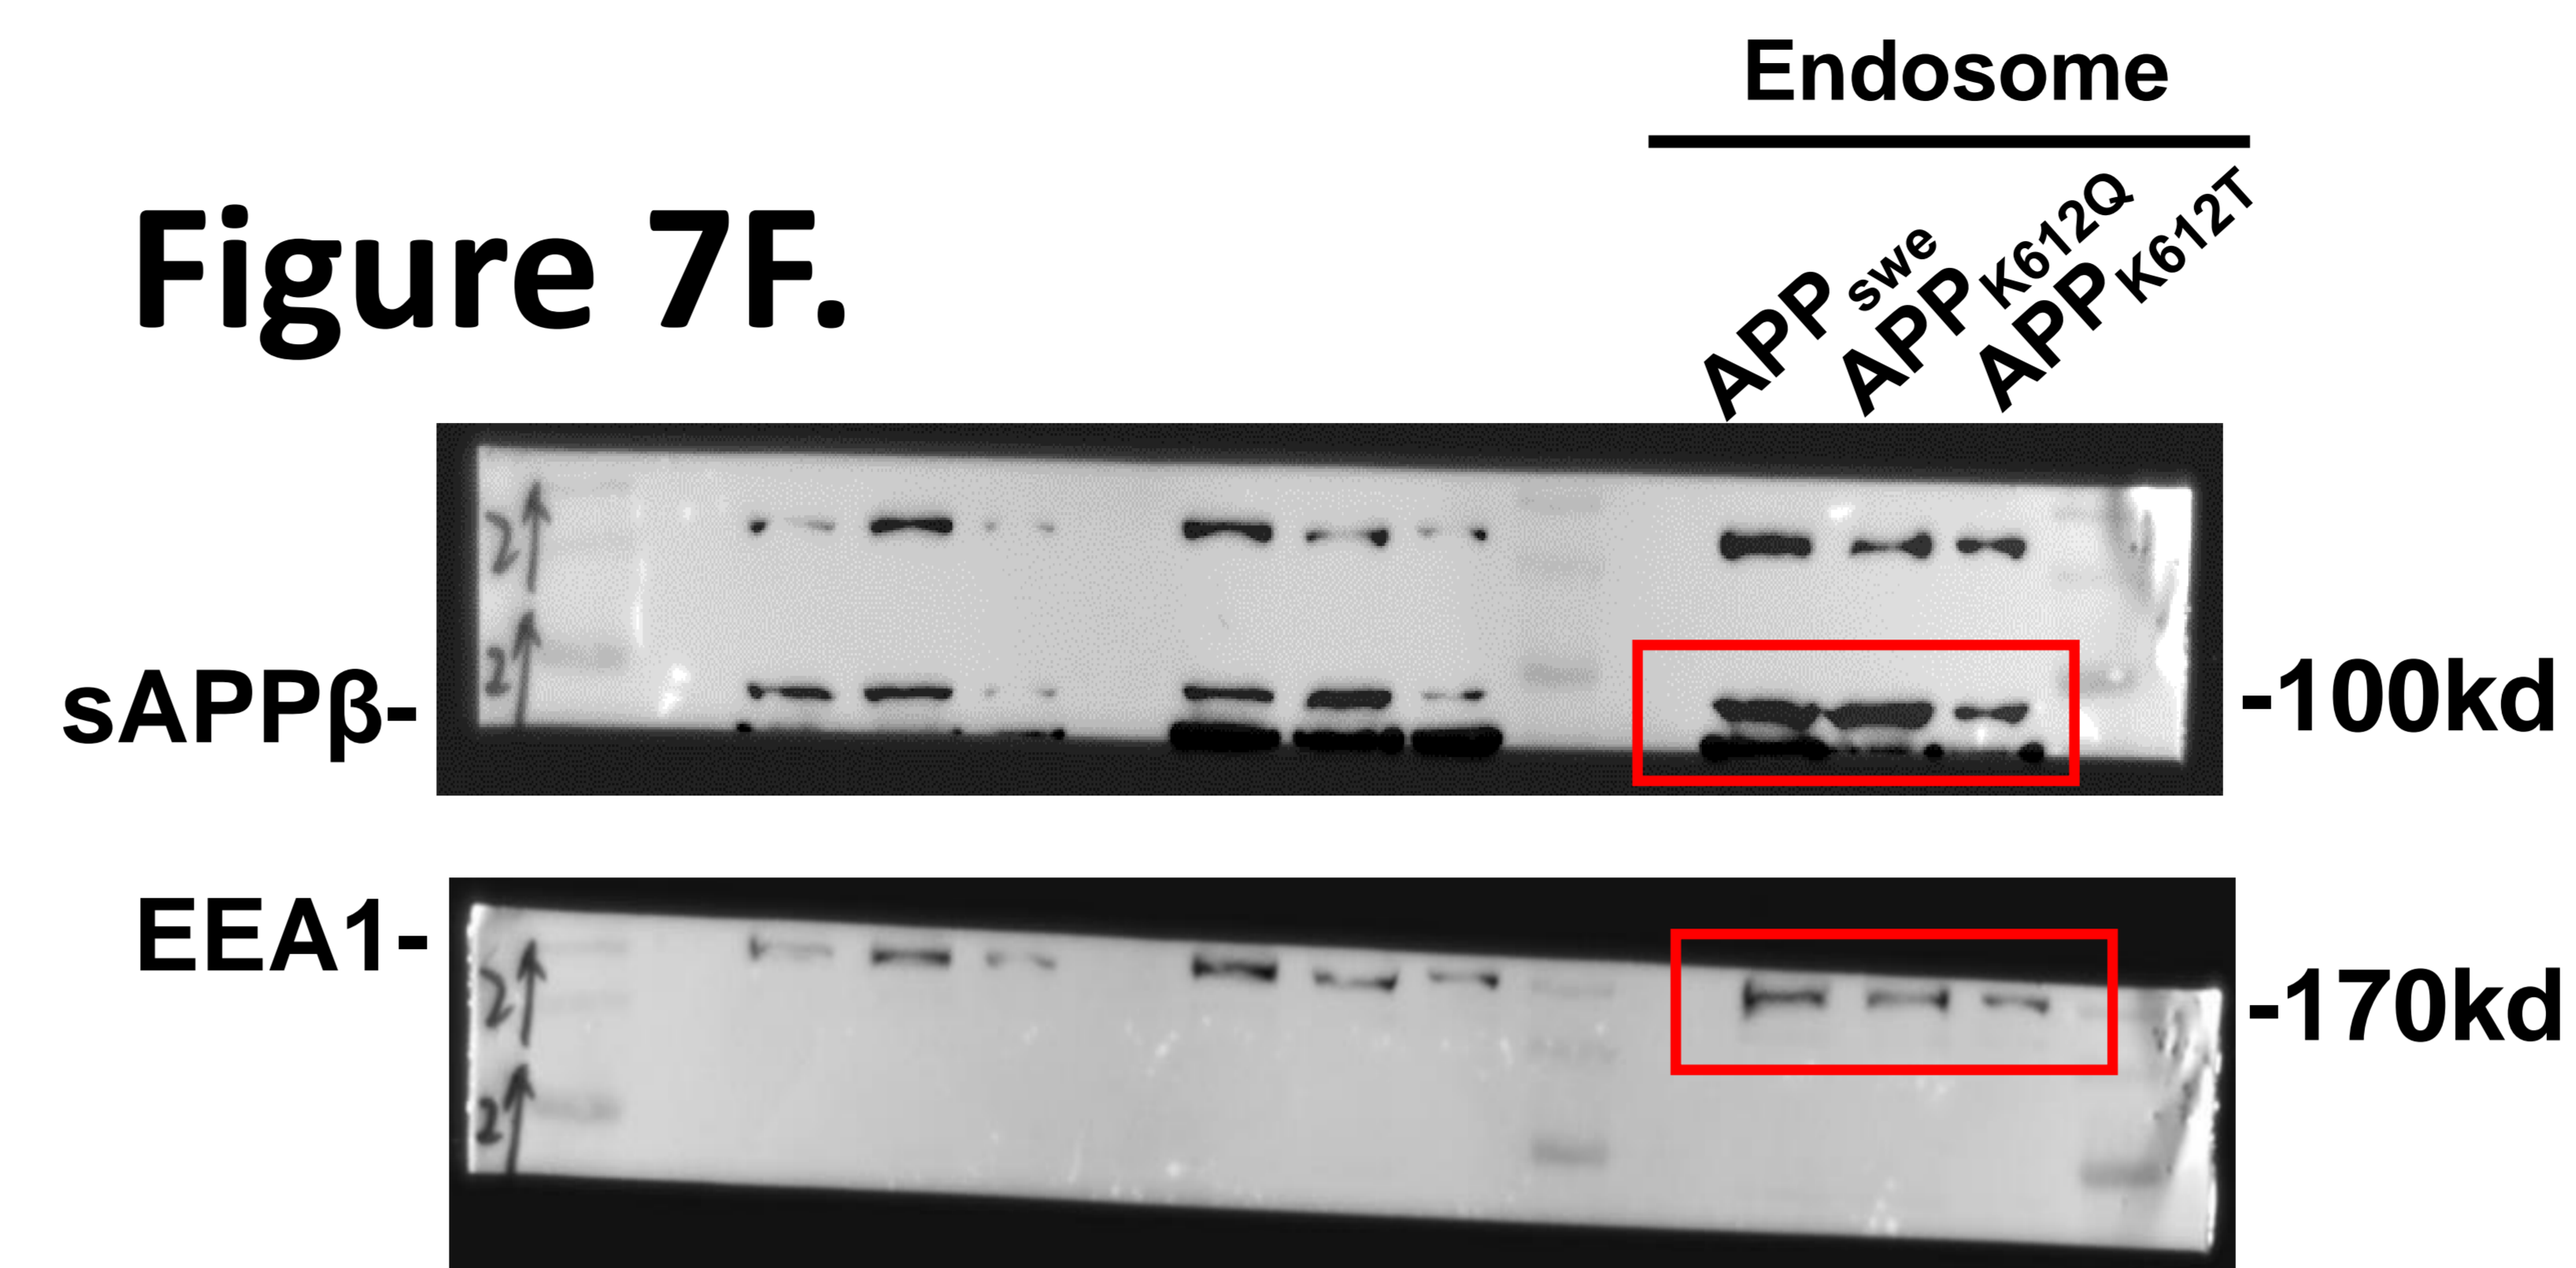**Figure 7G.**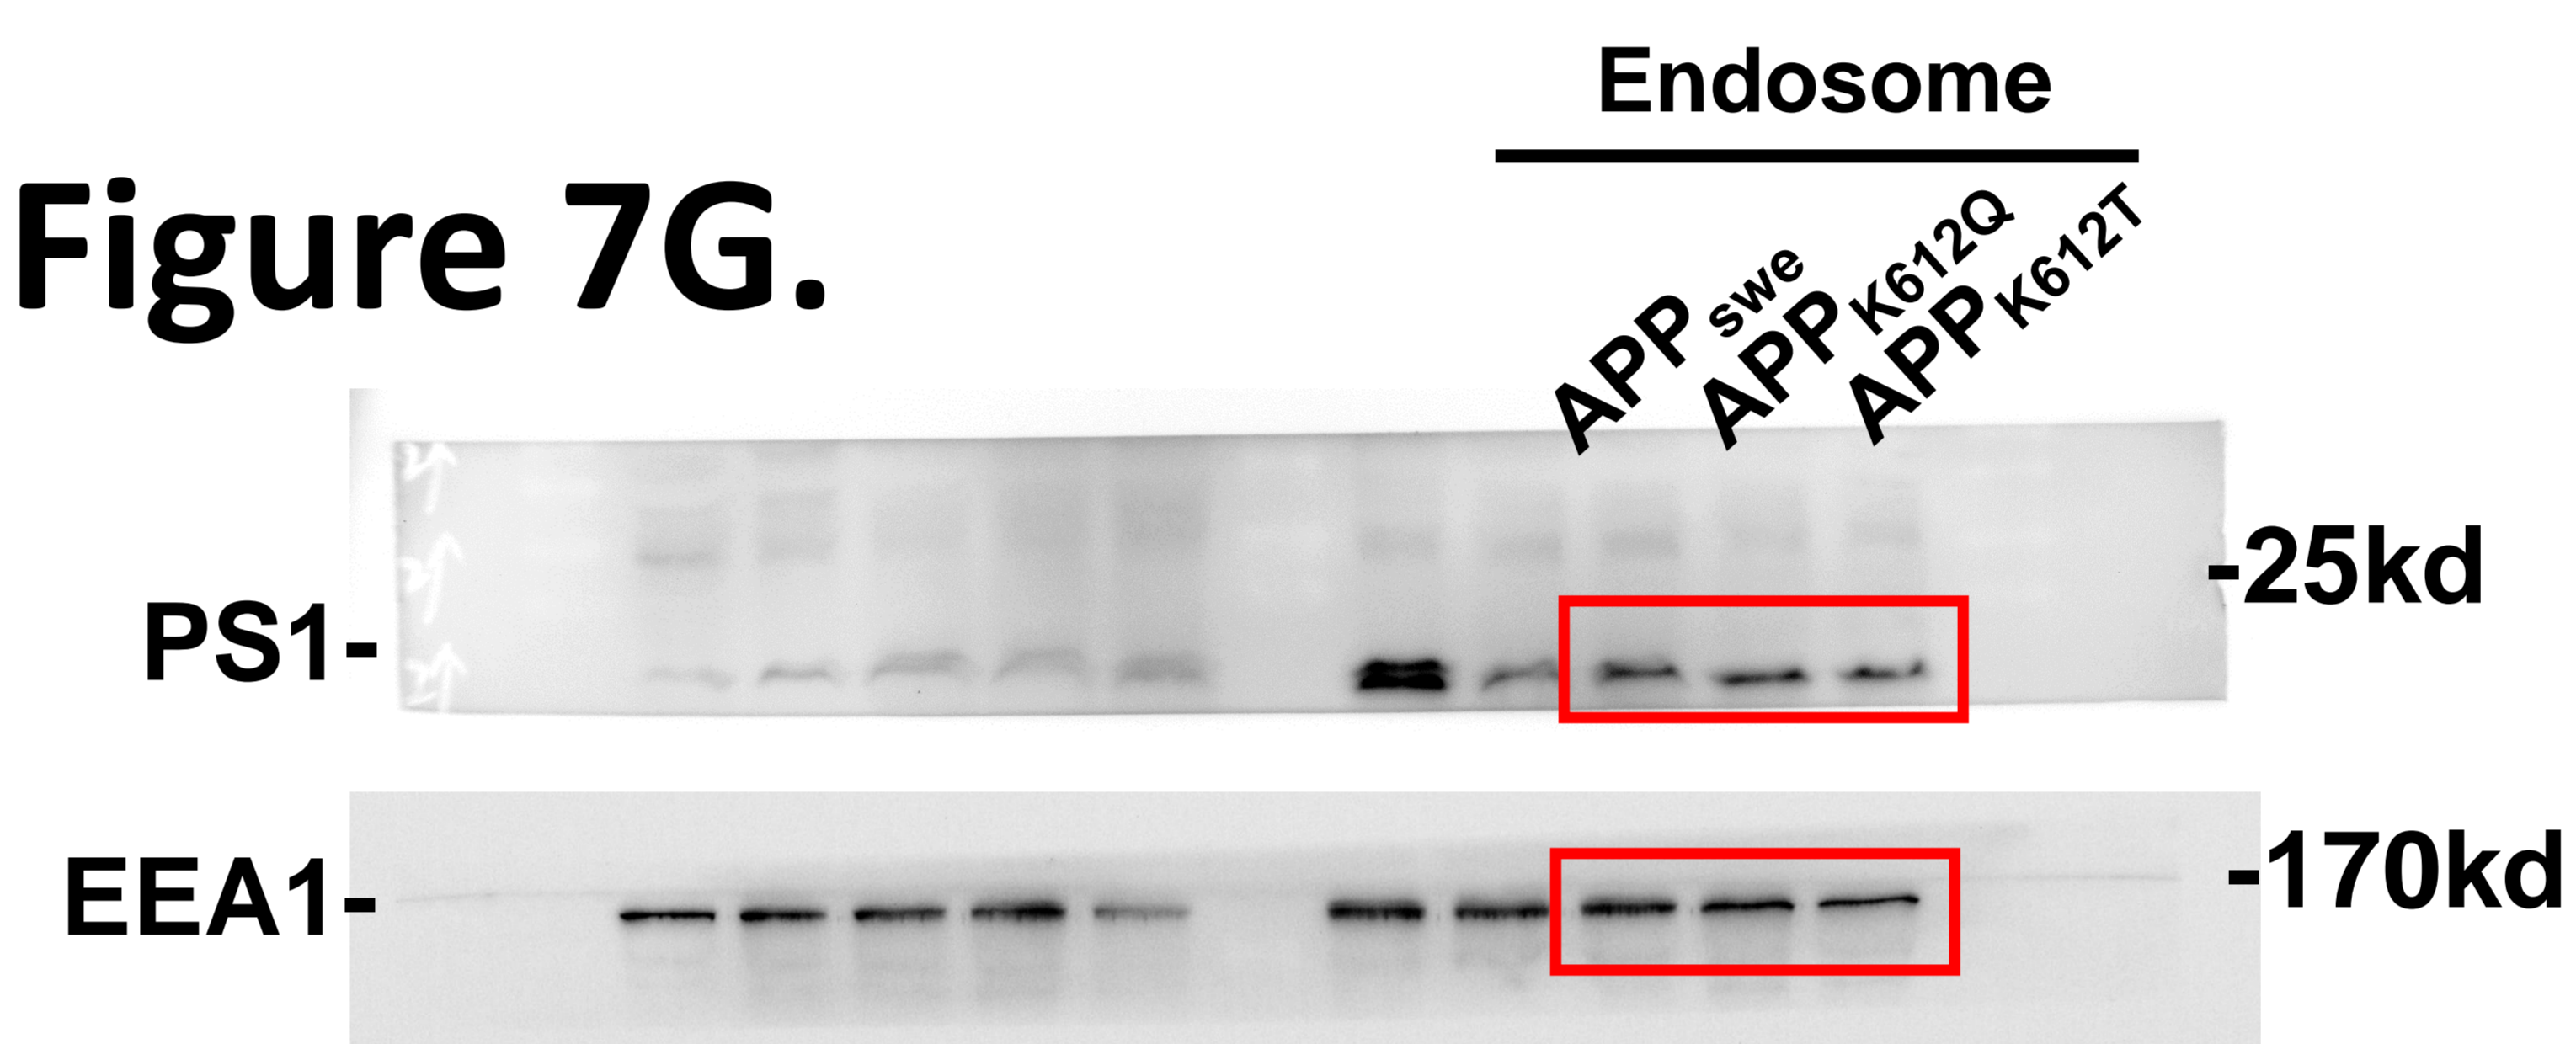**Figure 7H.**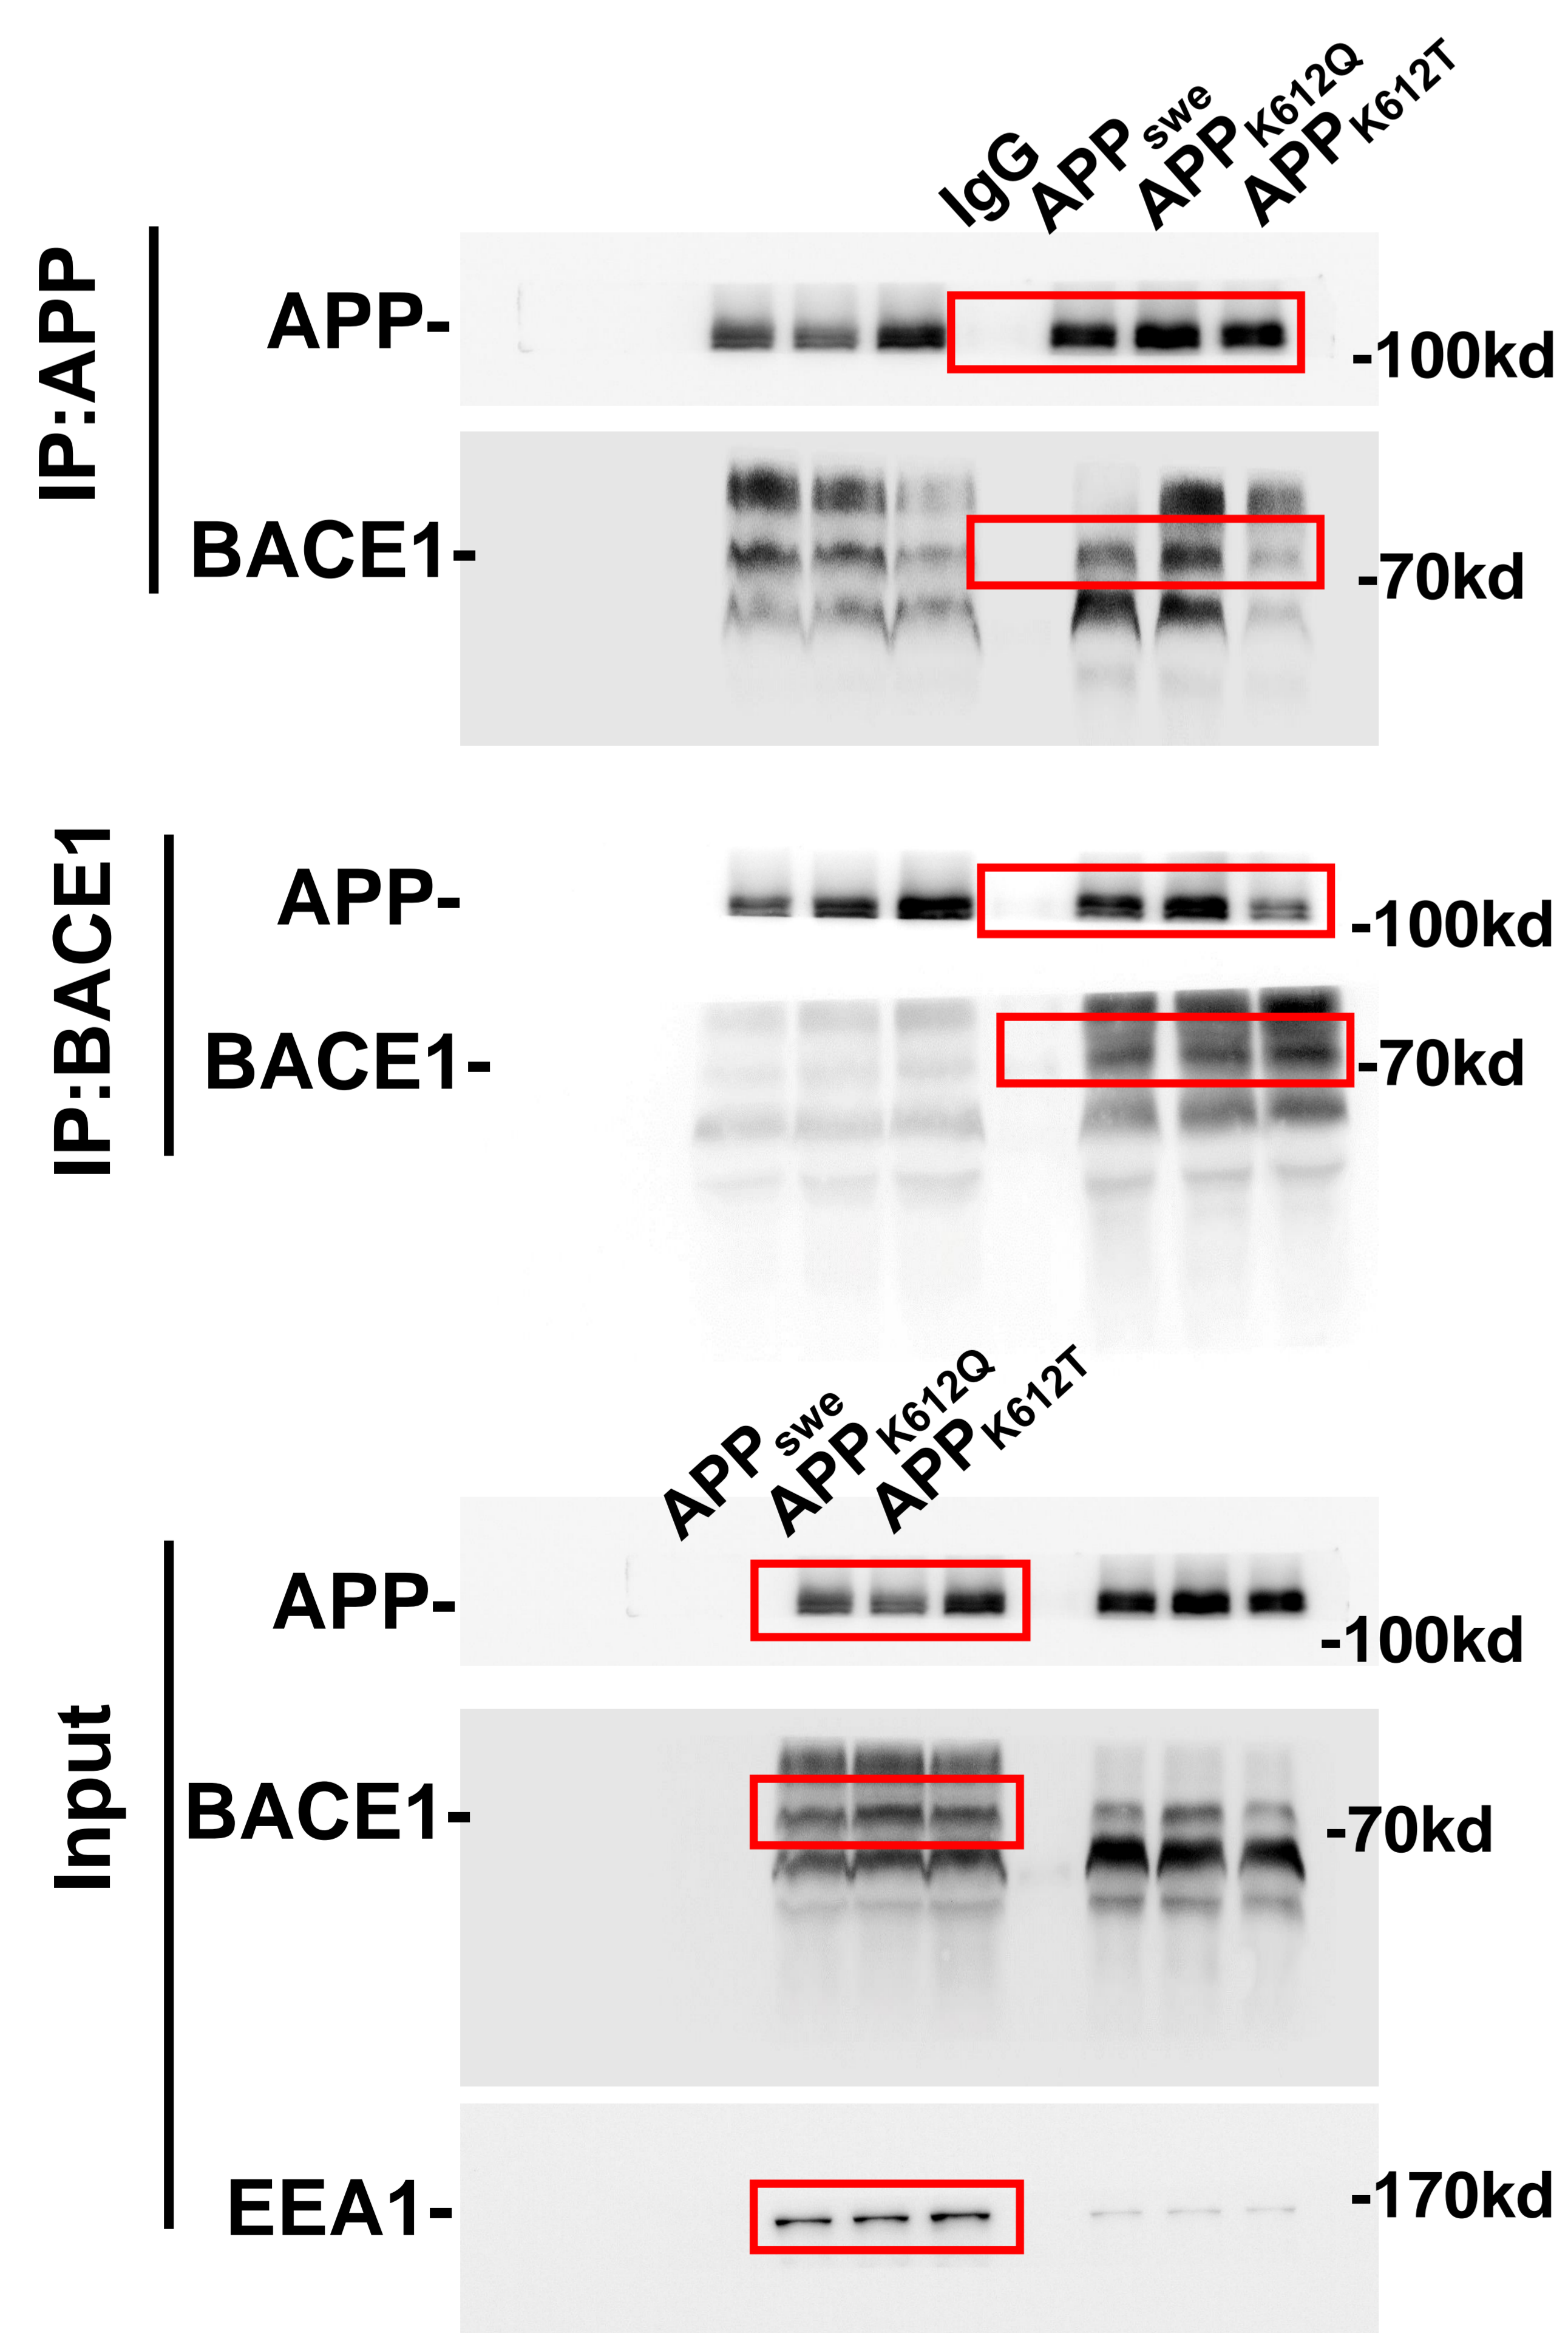**Figure 7I.**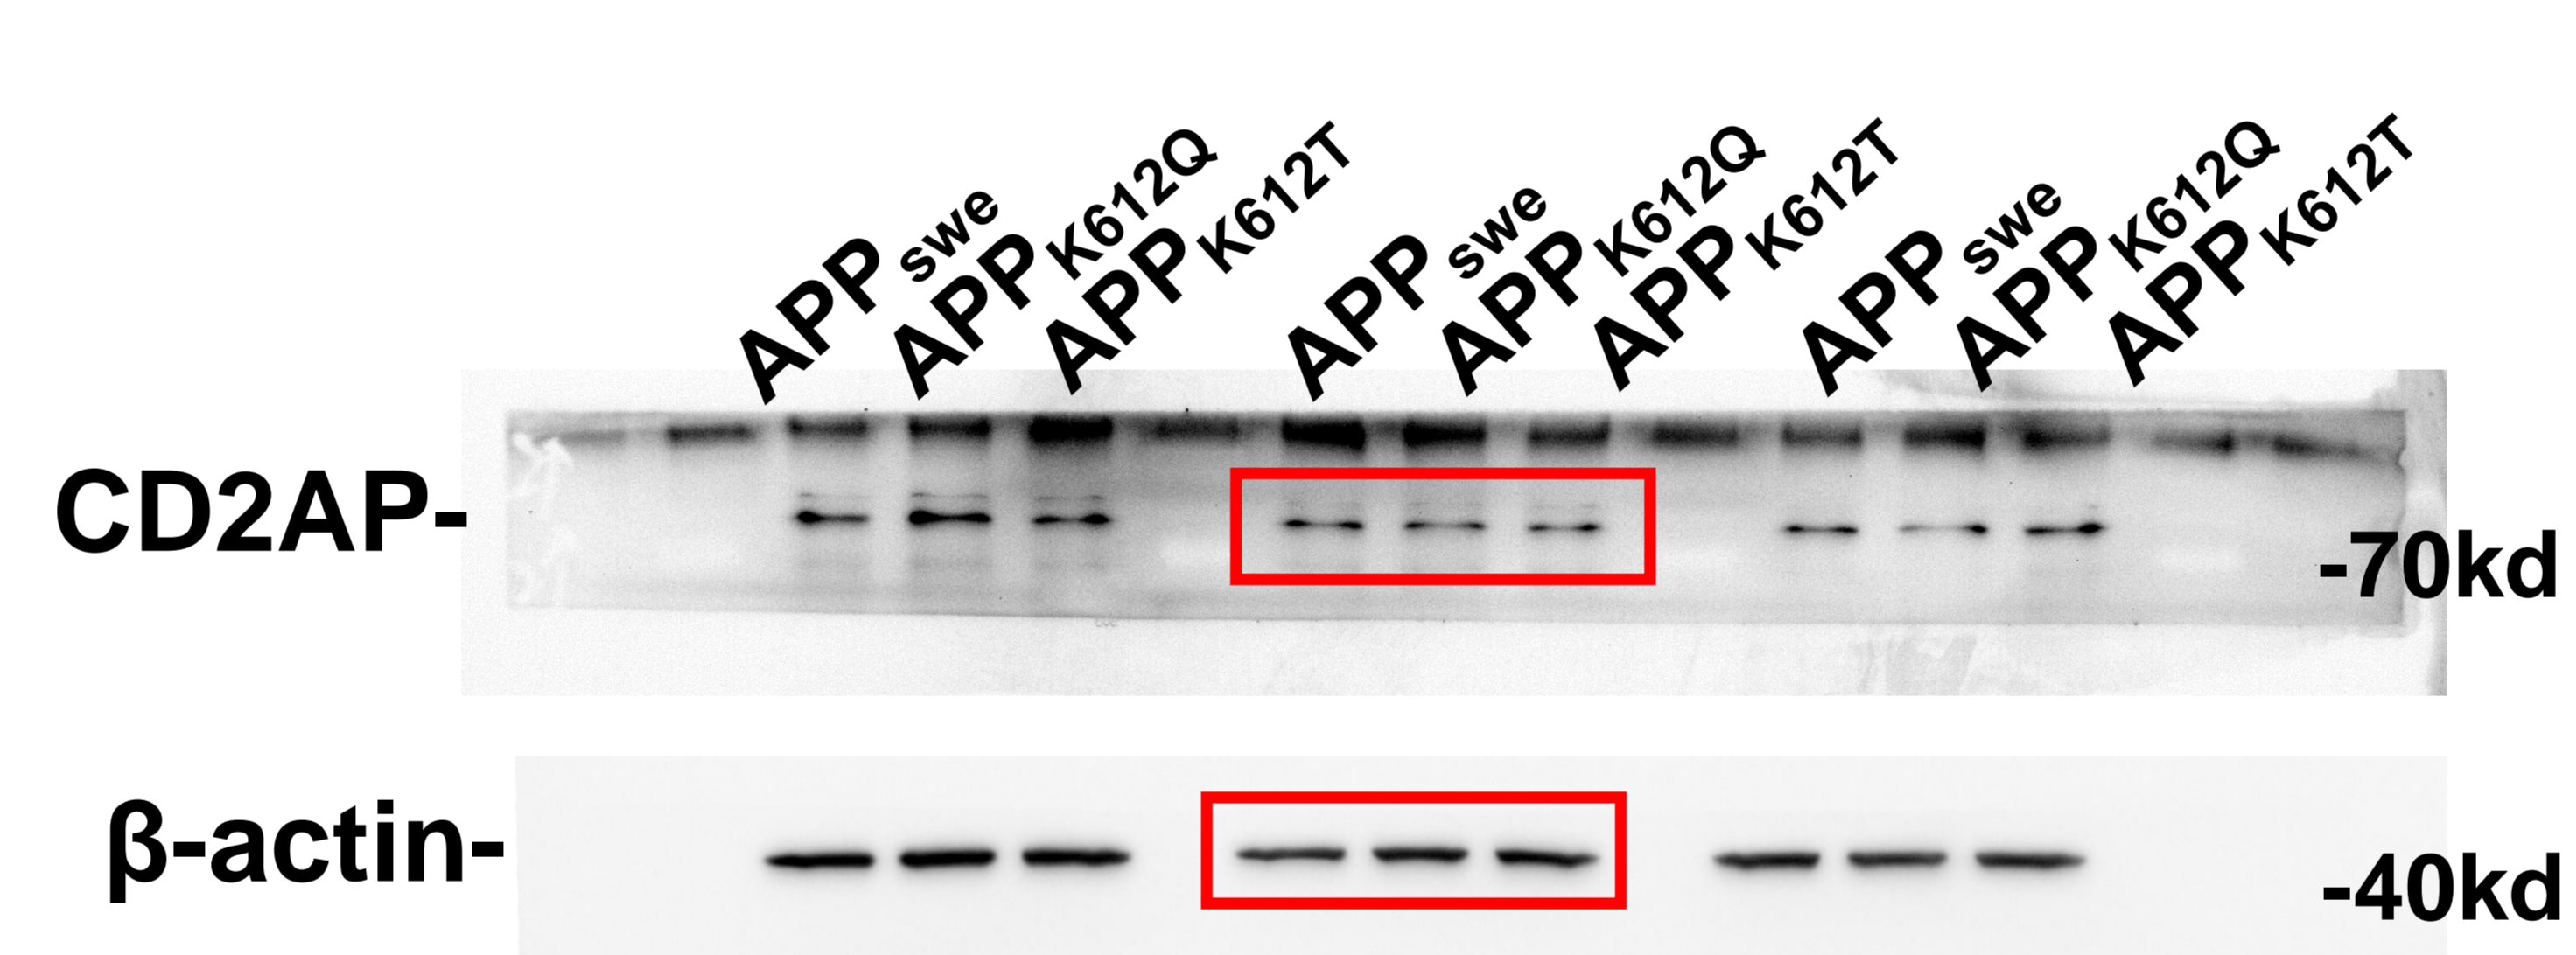**Figure 7L.**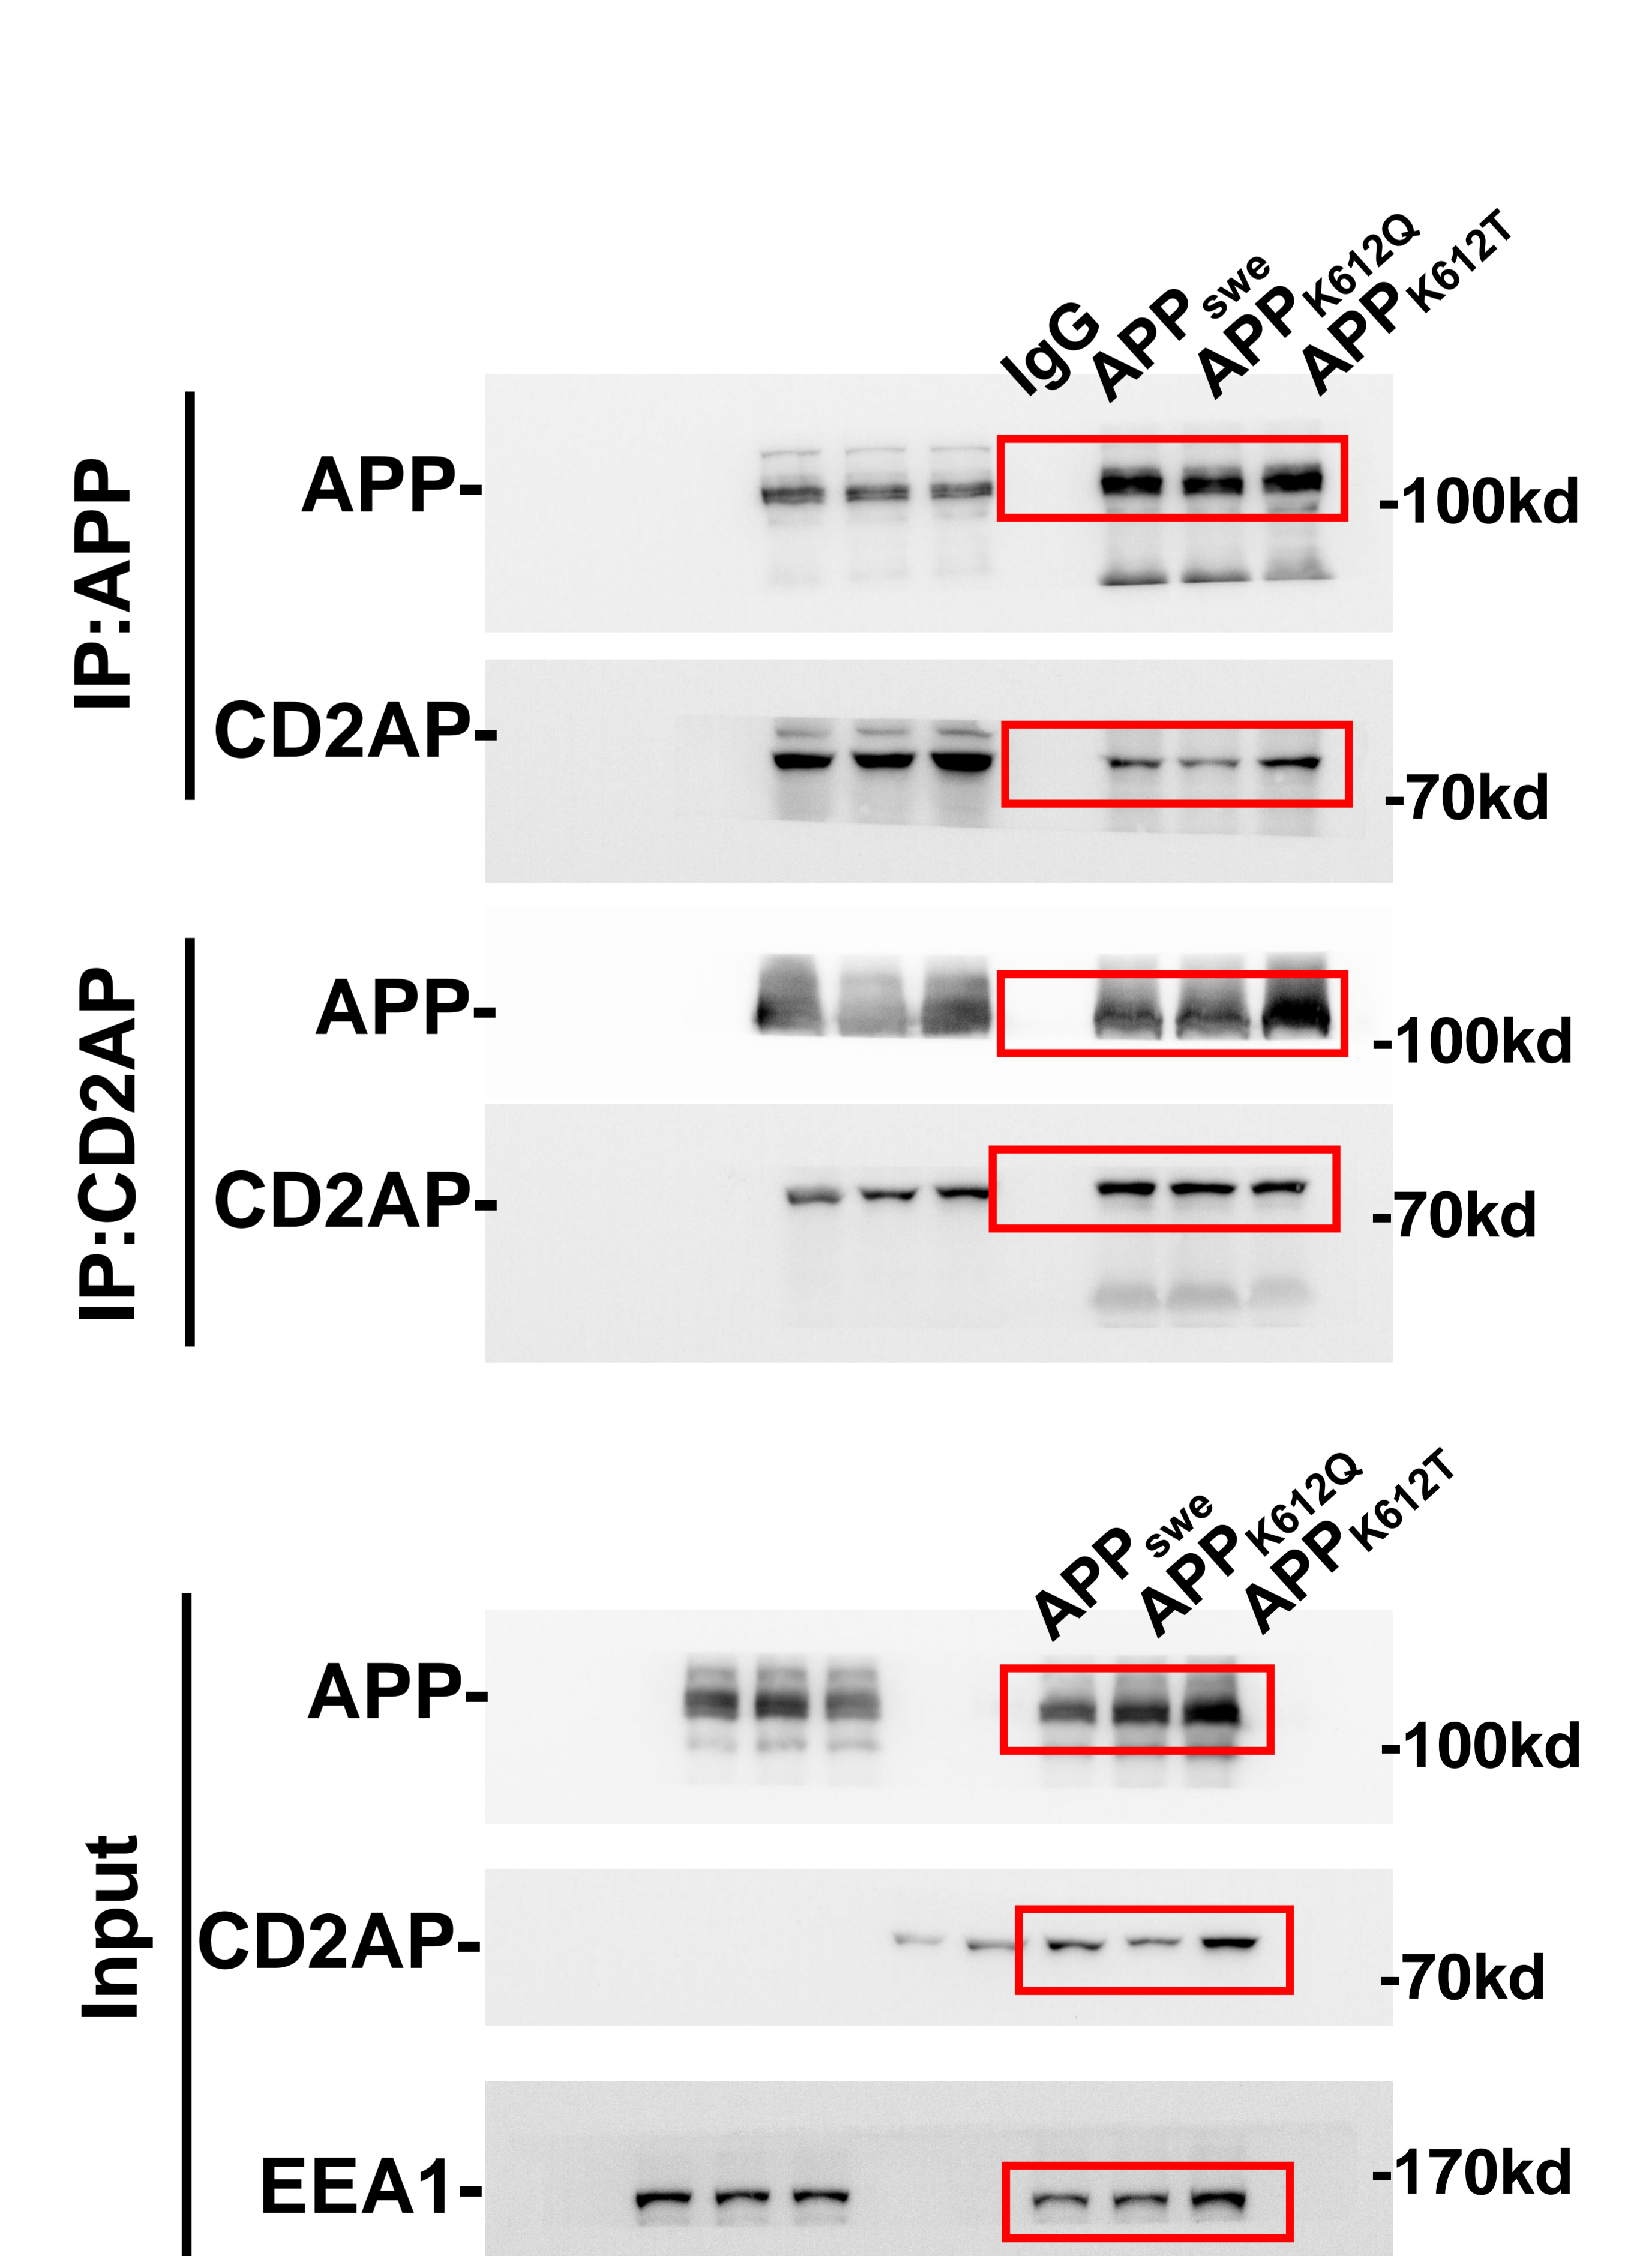**Figure 7J.**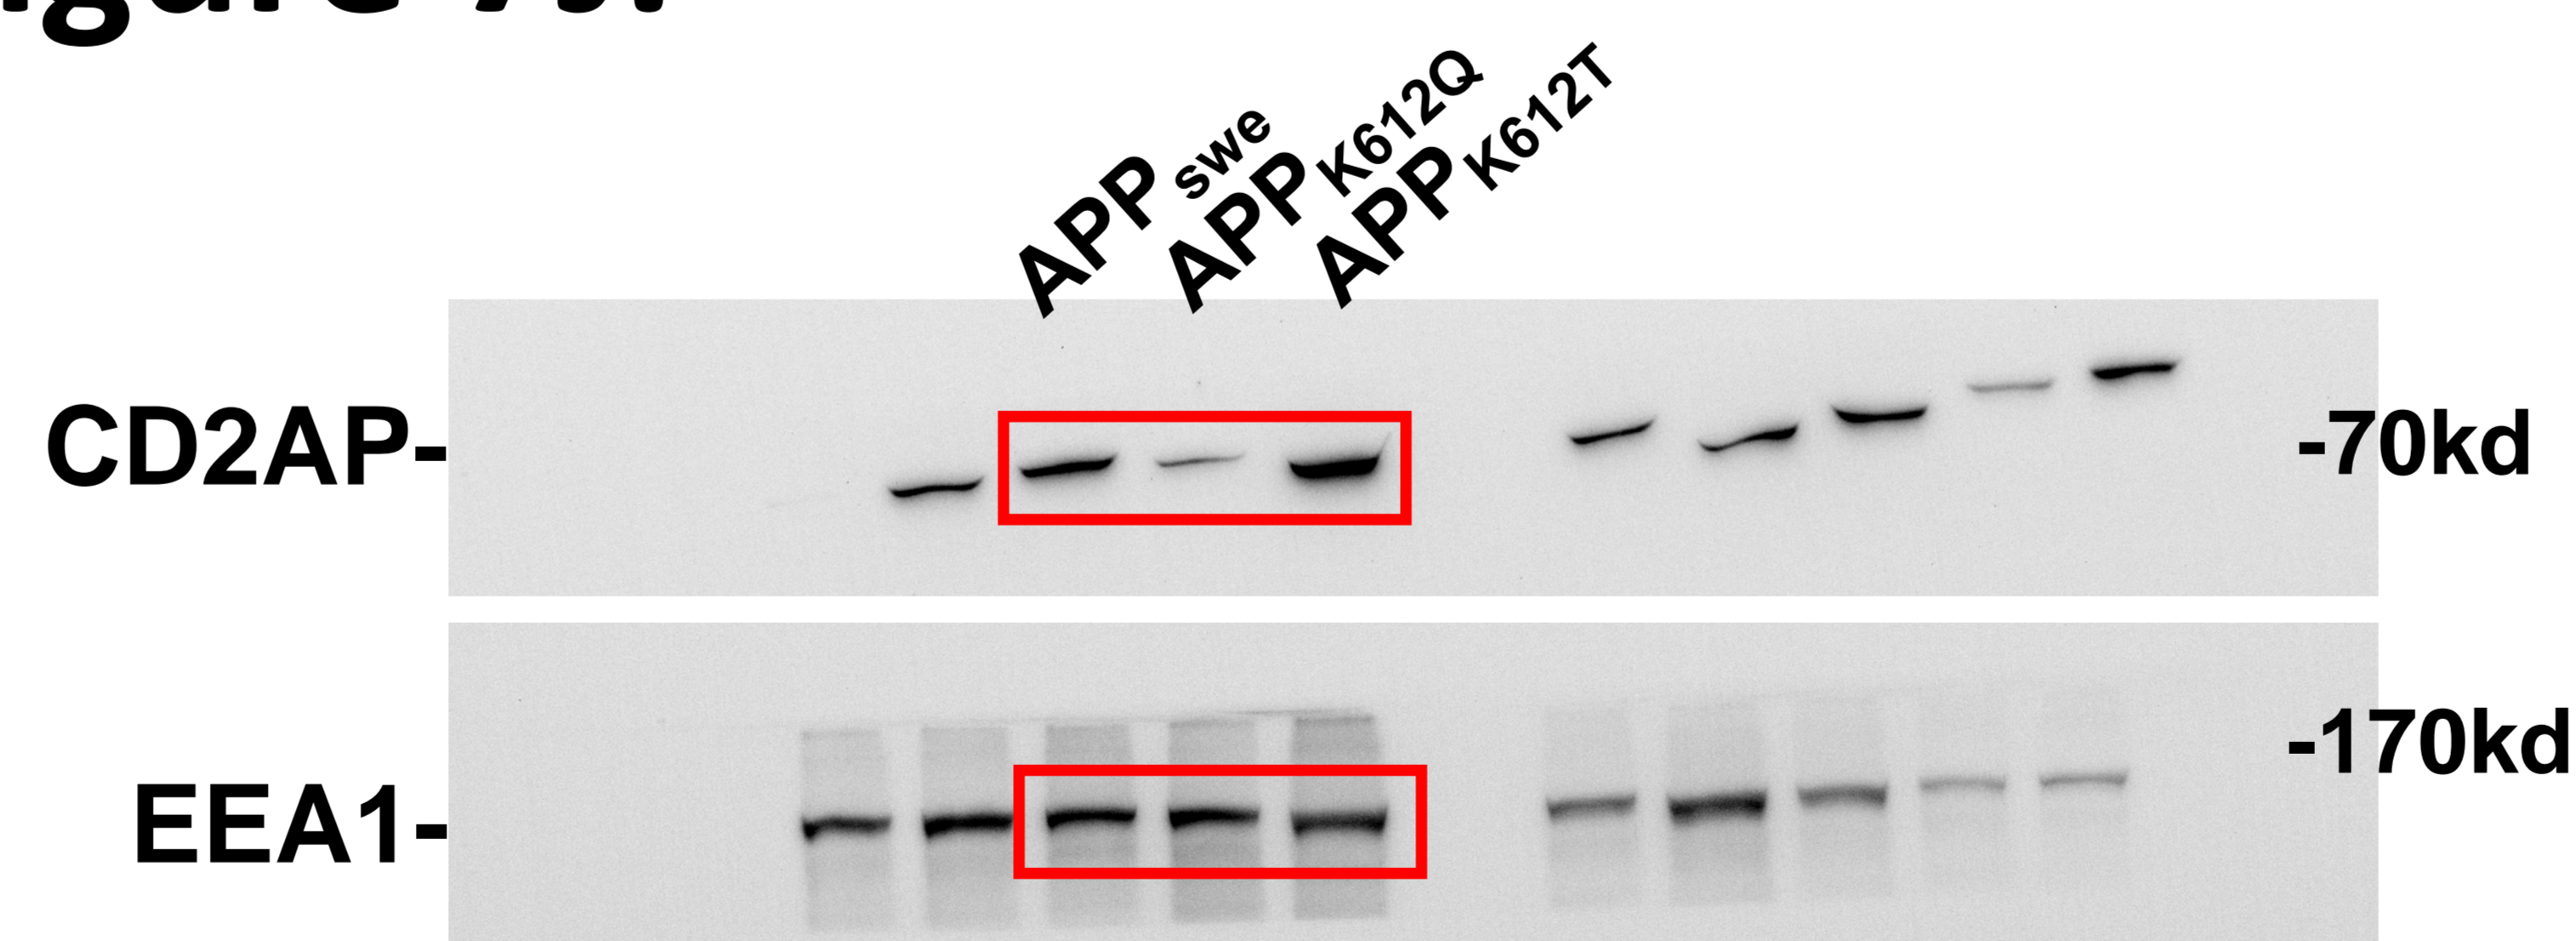**Figure 7K.**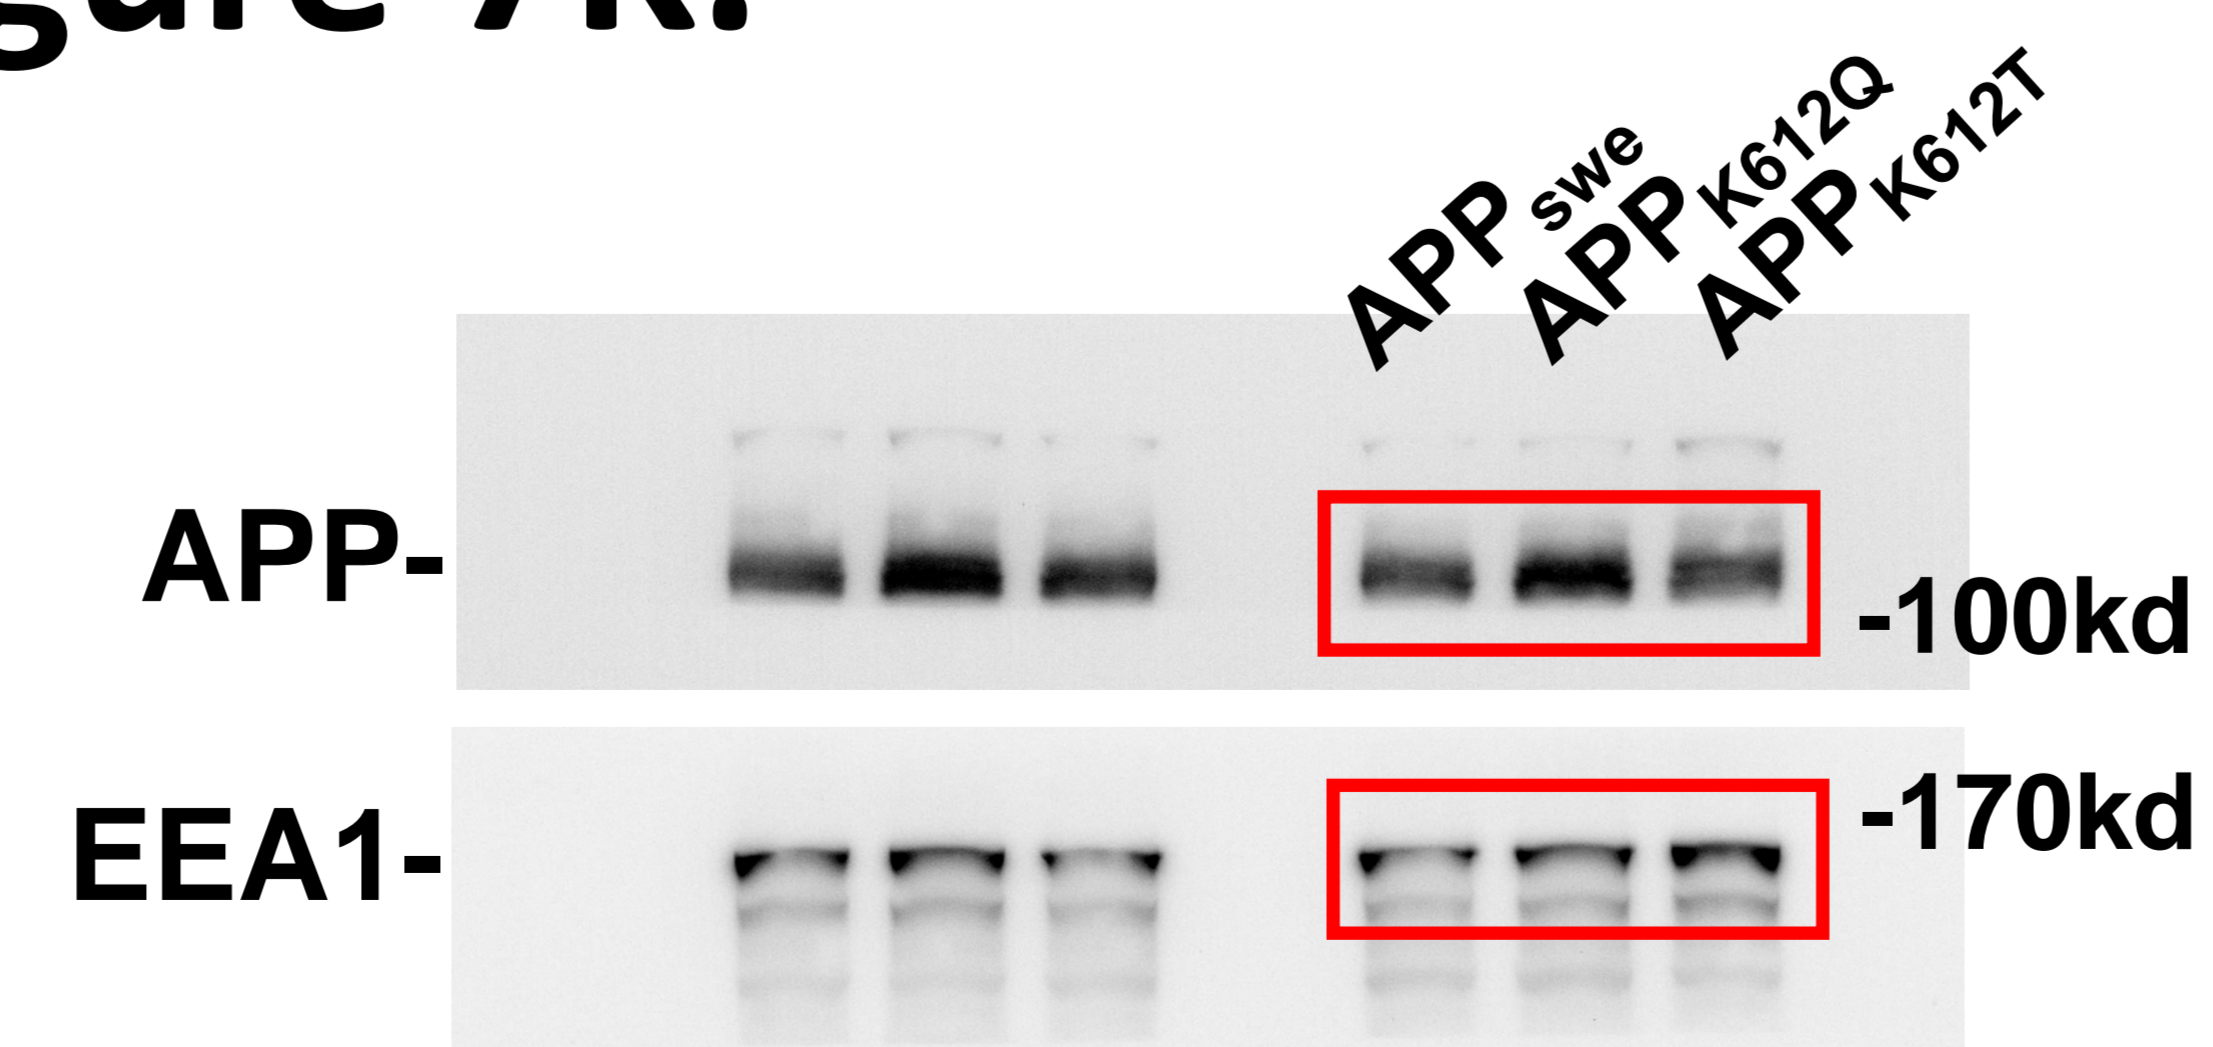

Figure 8A.

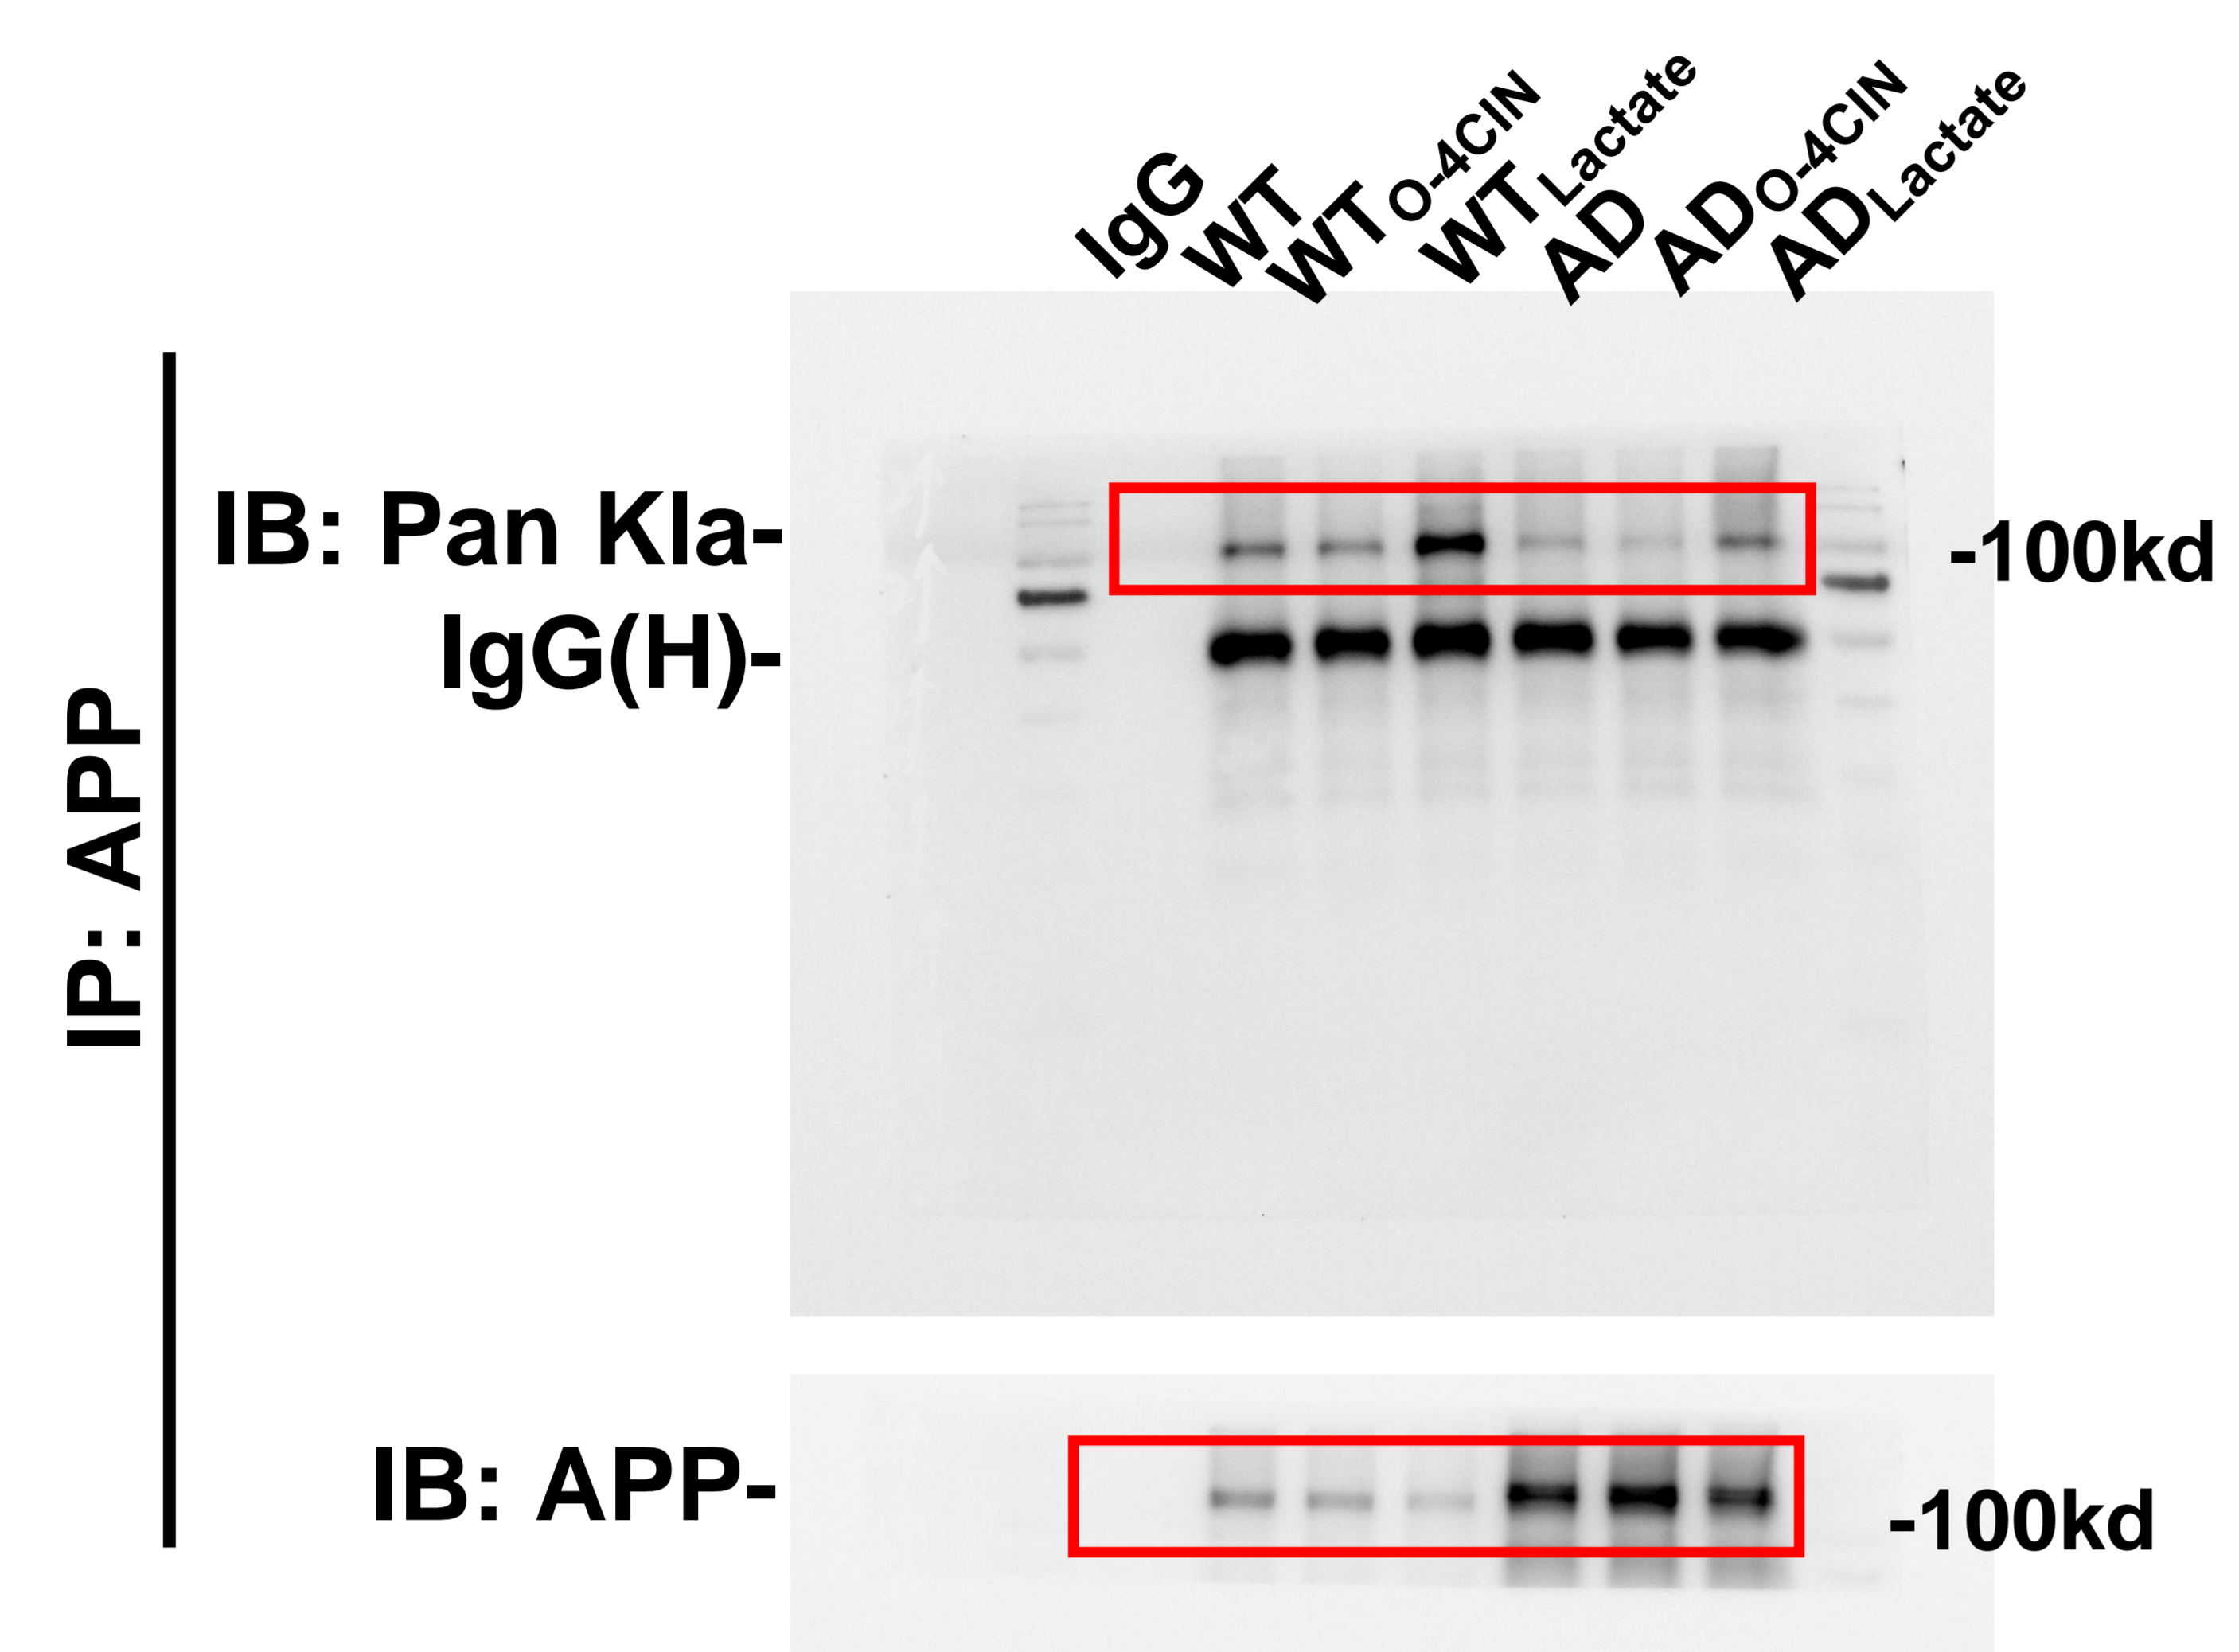

Figure 8D.

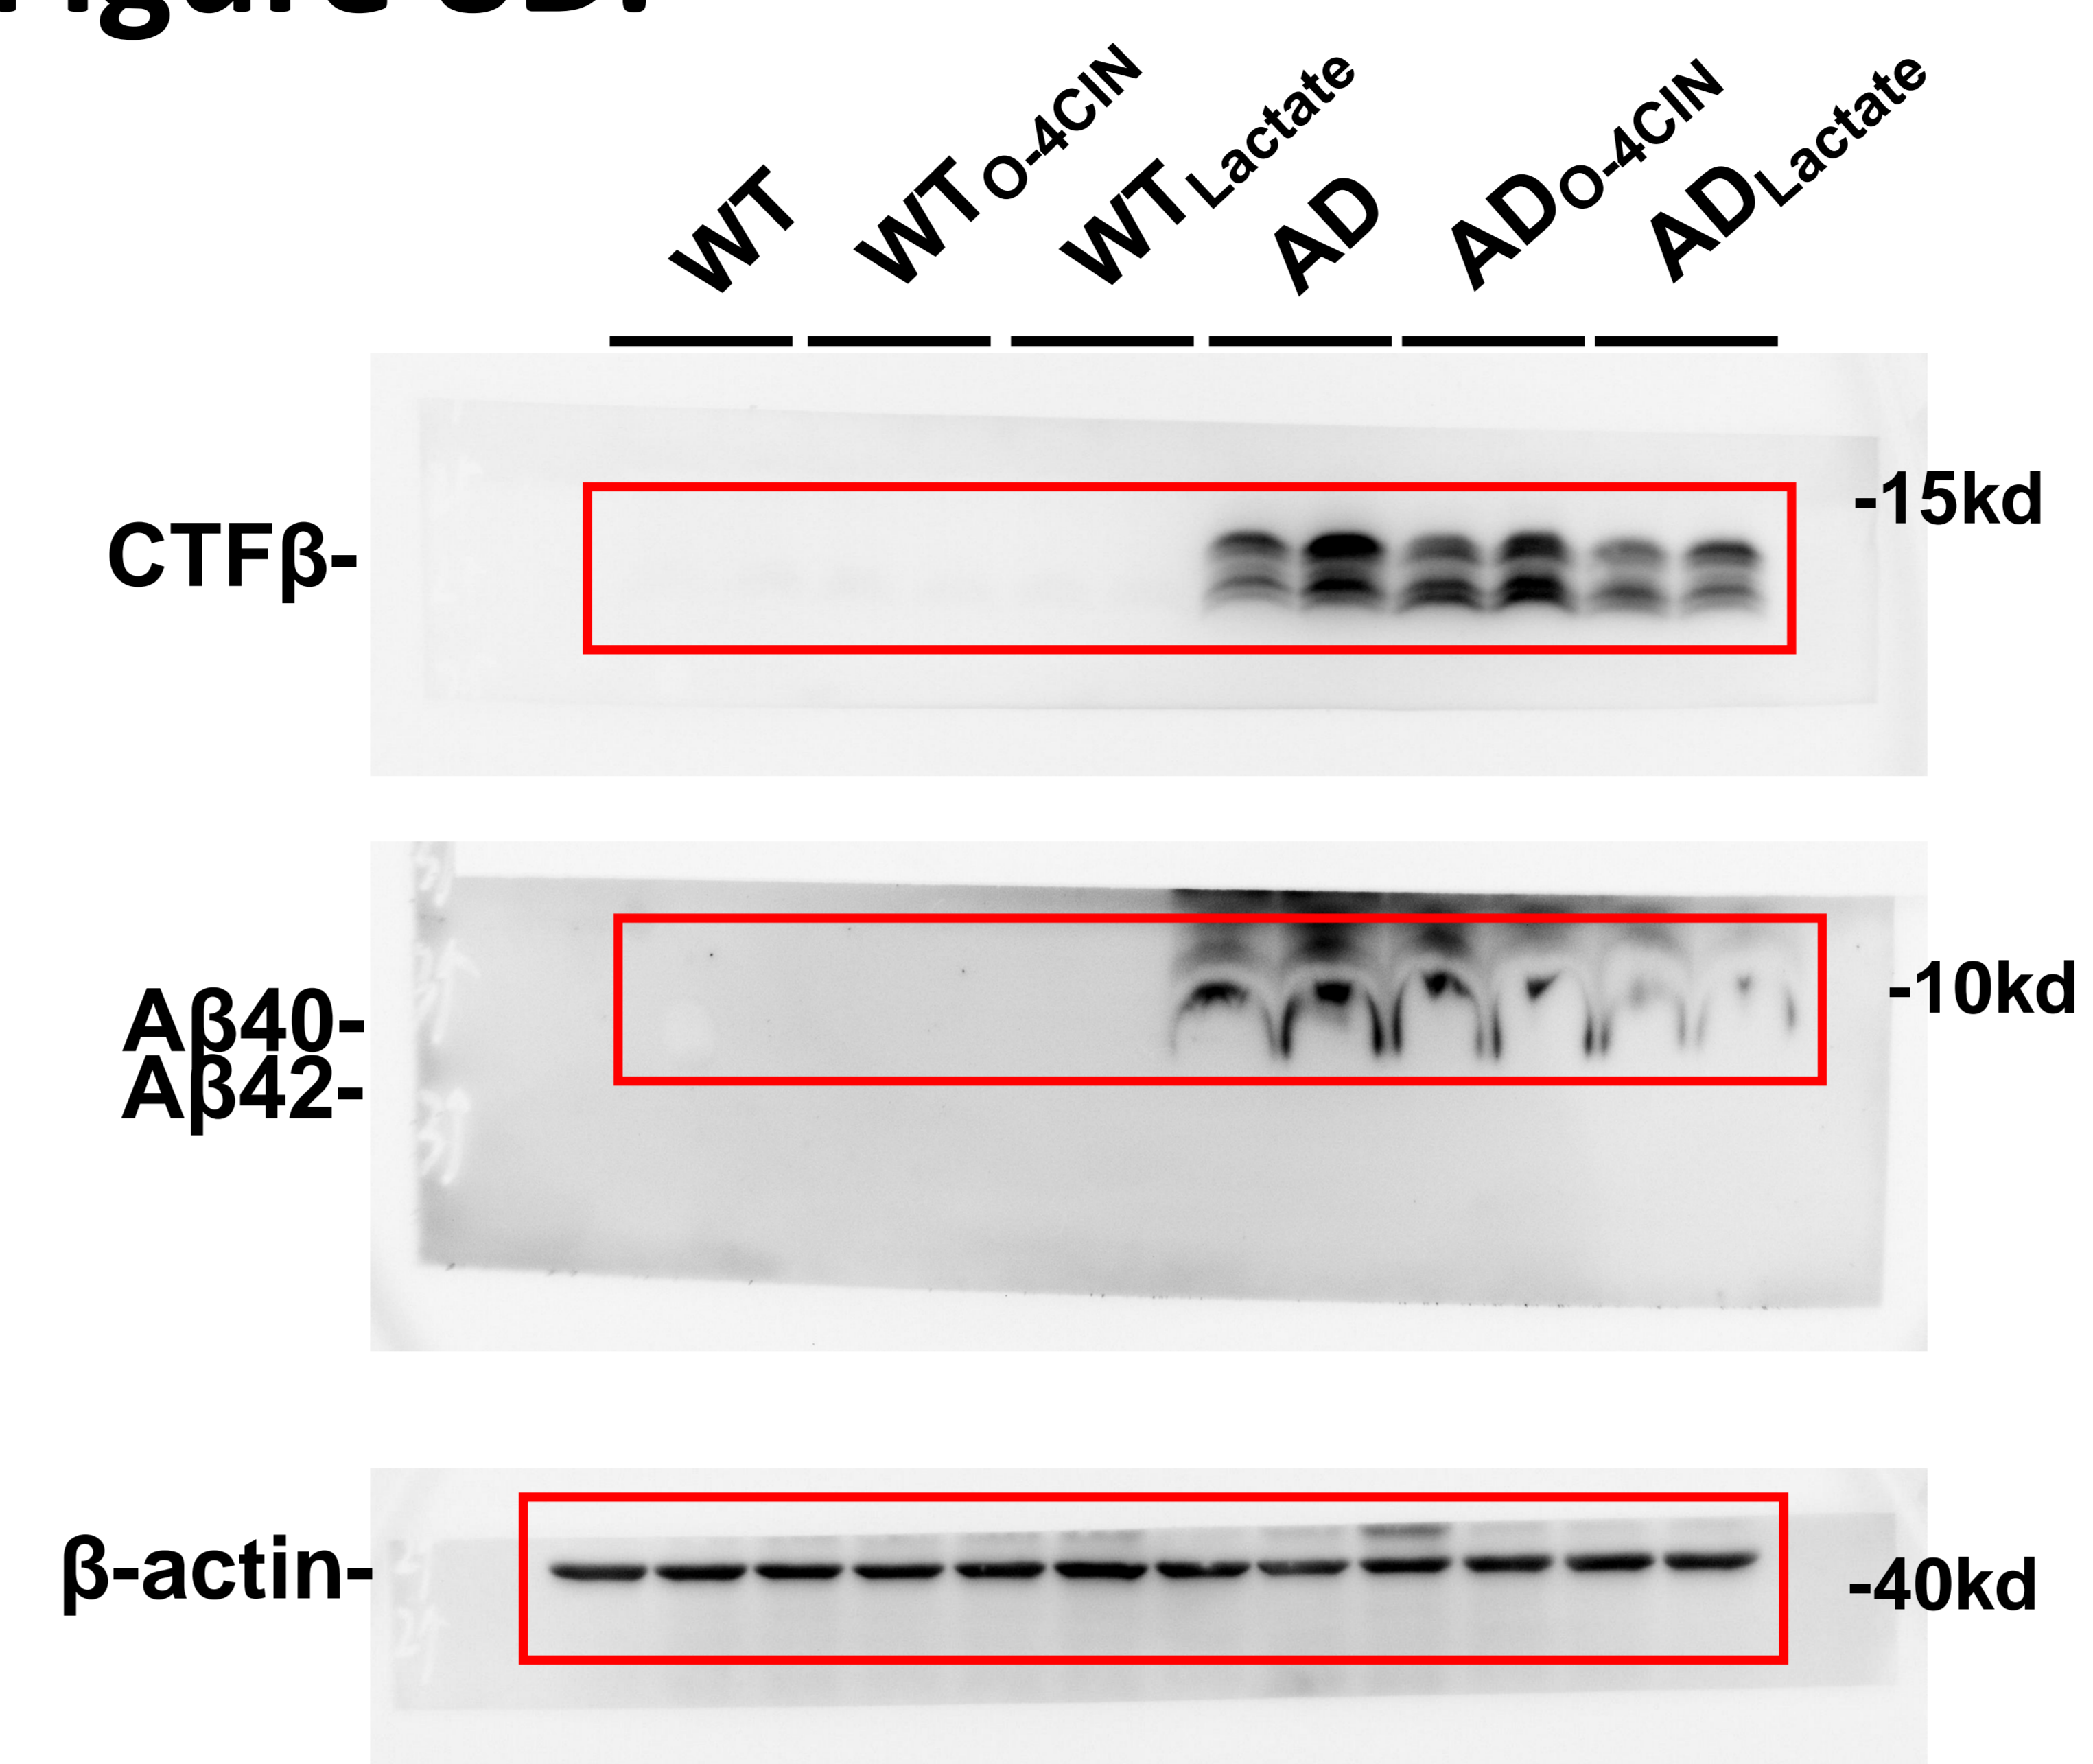

## Supplemental Figure 1A

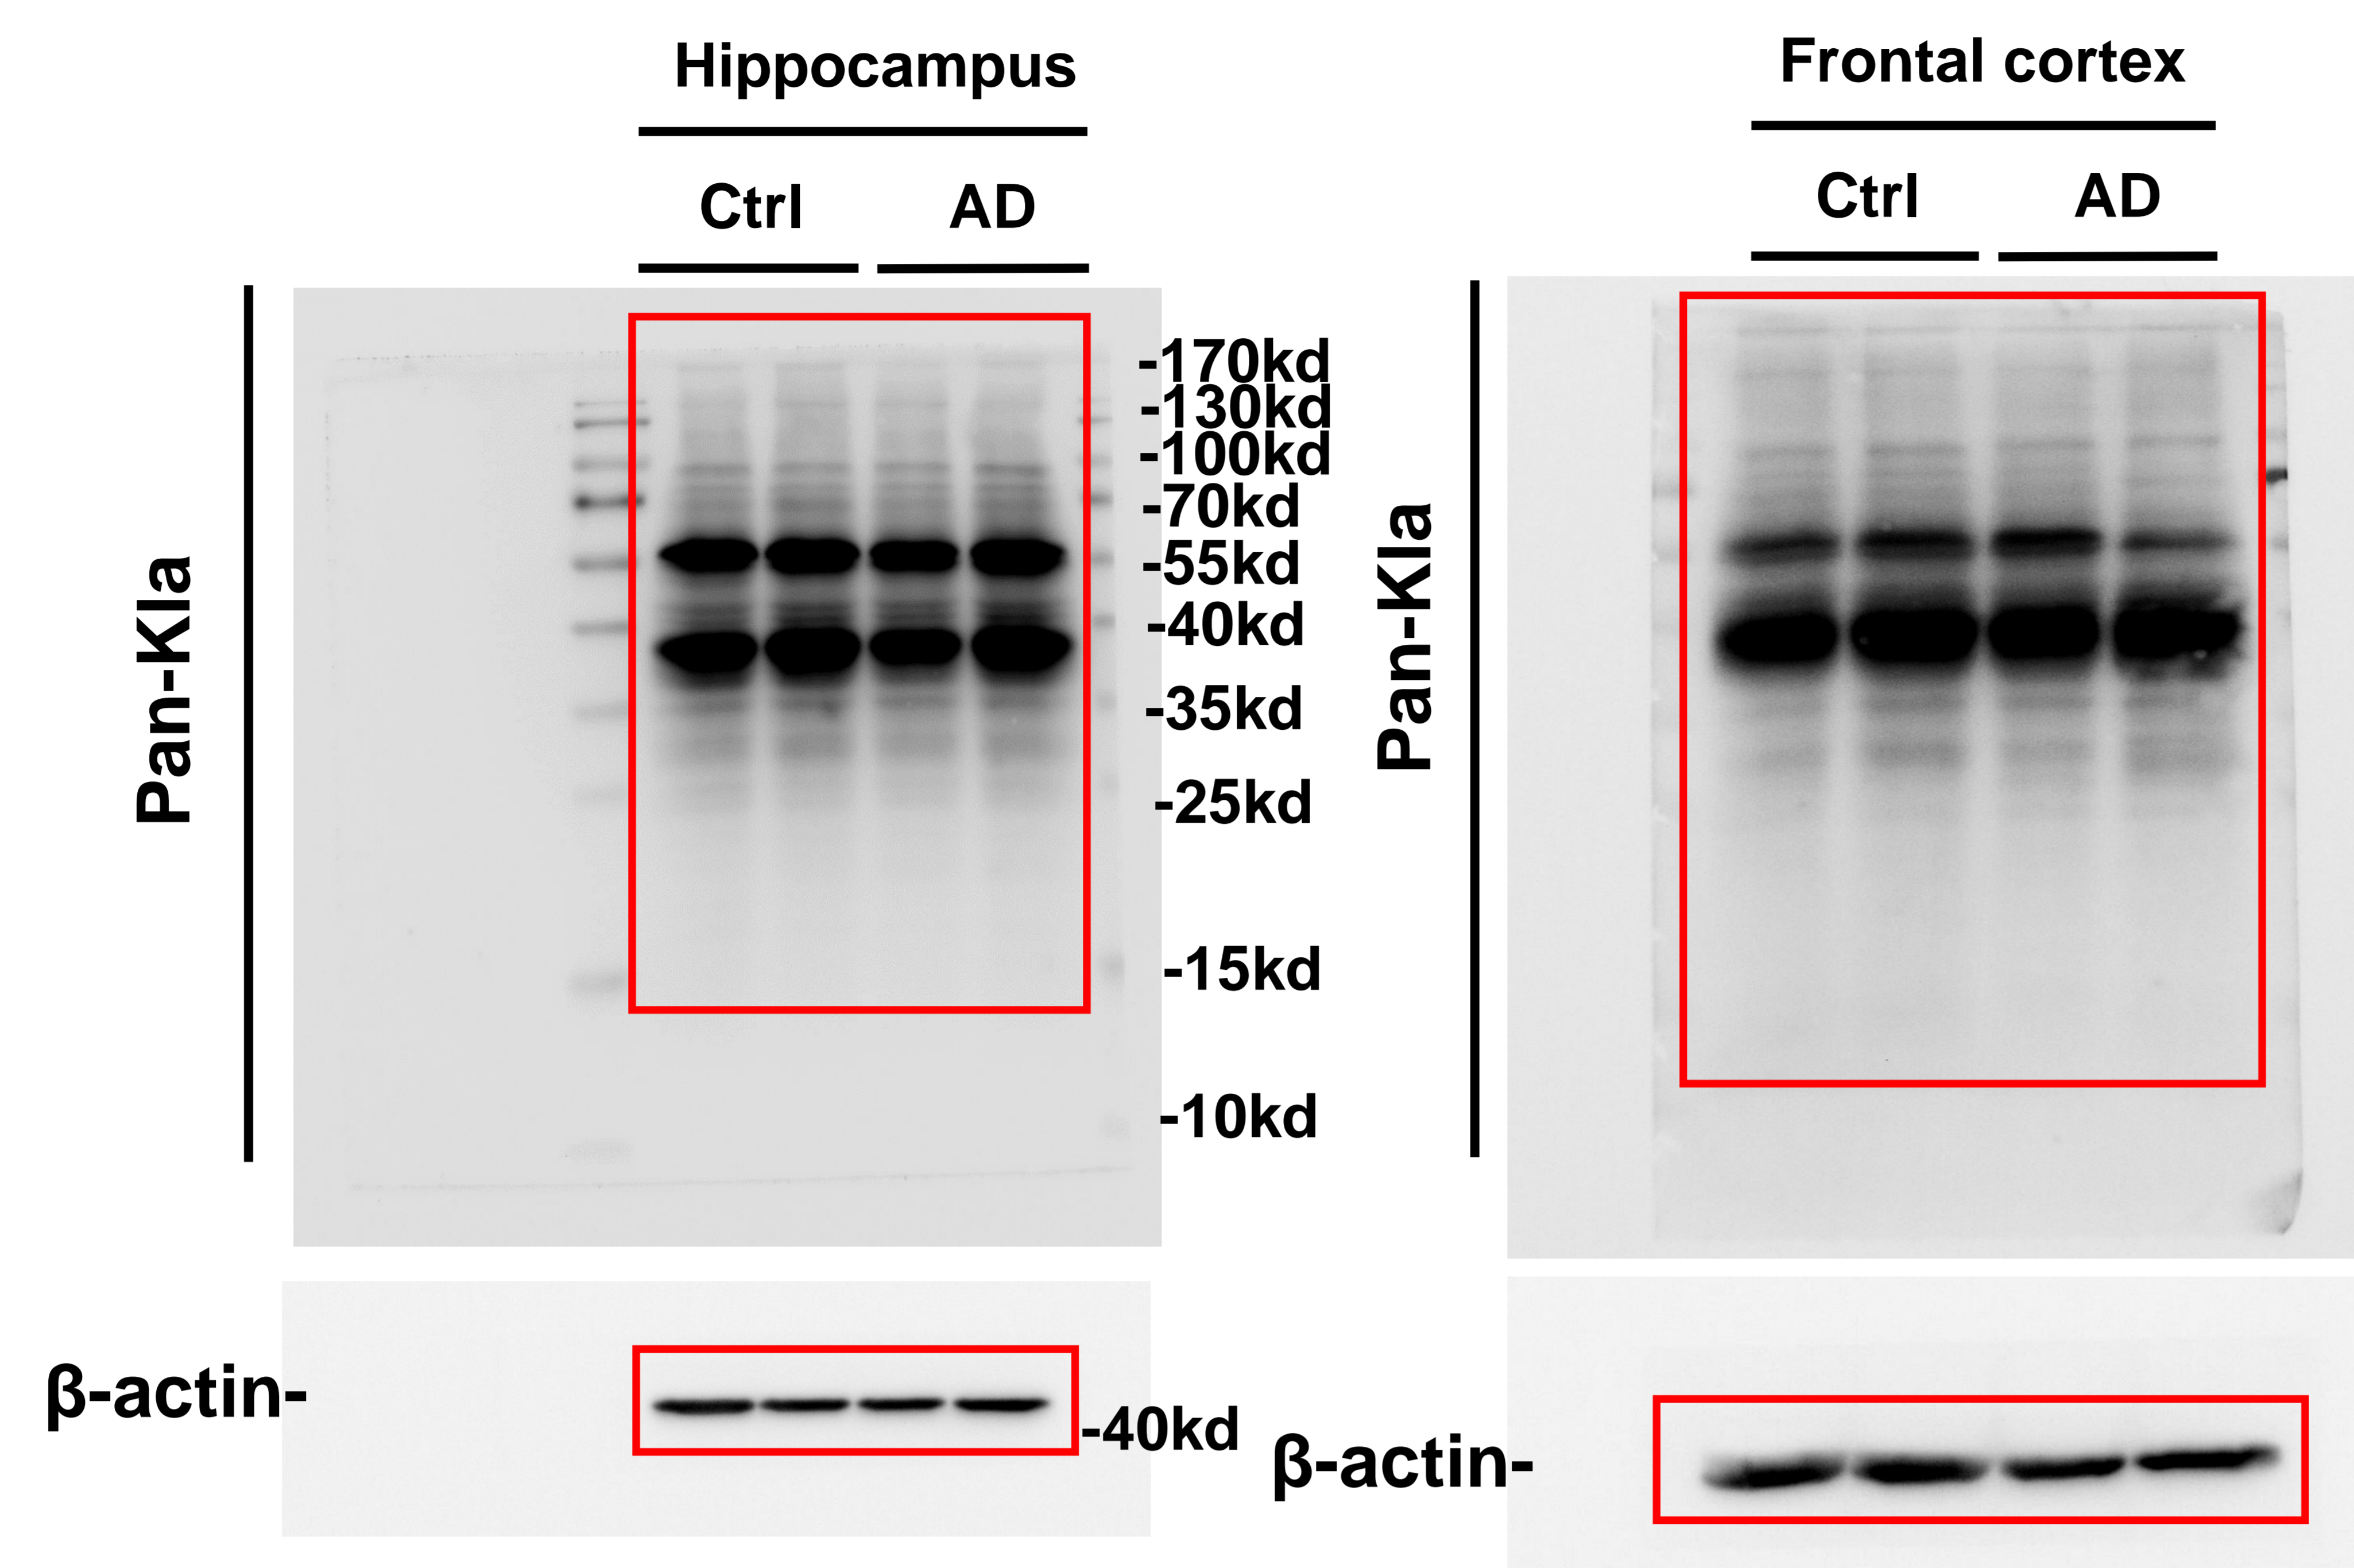

## Supplemental Figure 1B

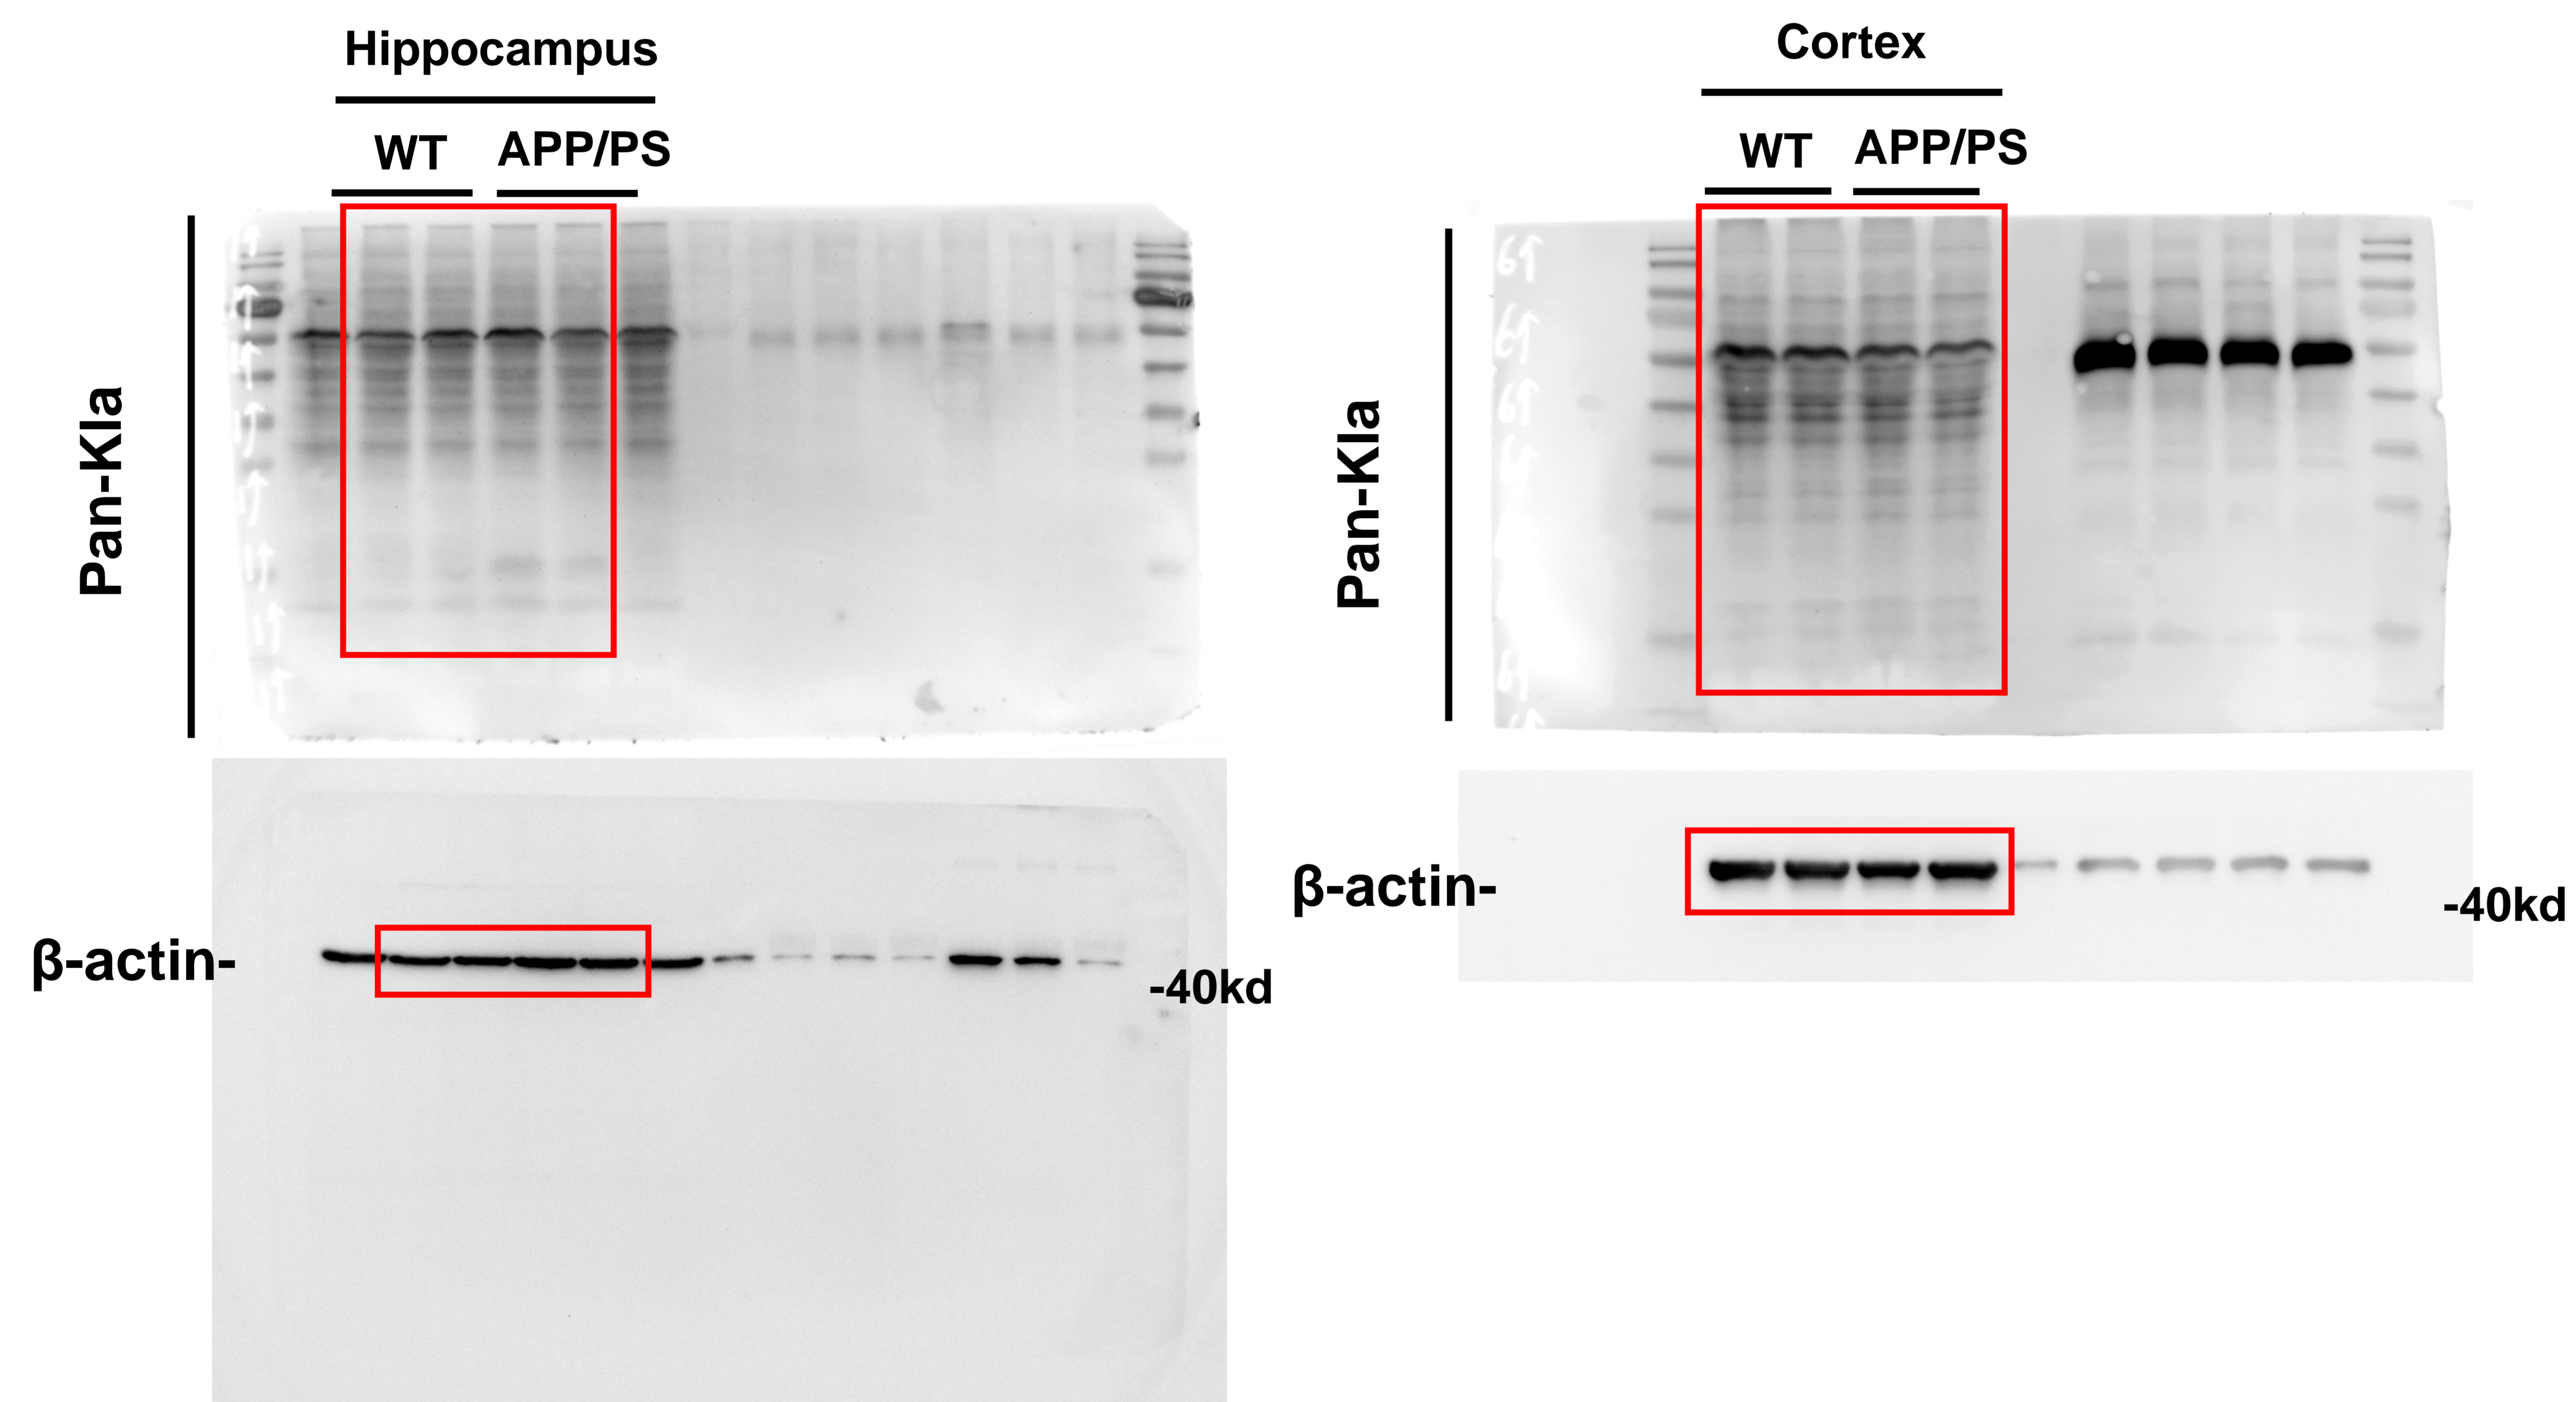

### Supplemental Figure 2D

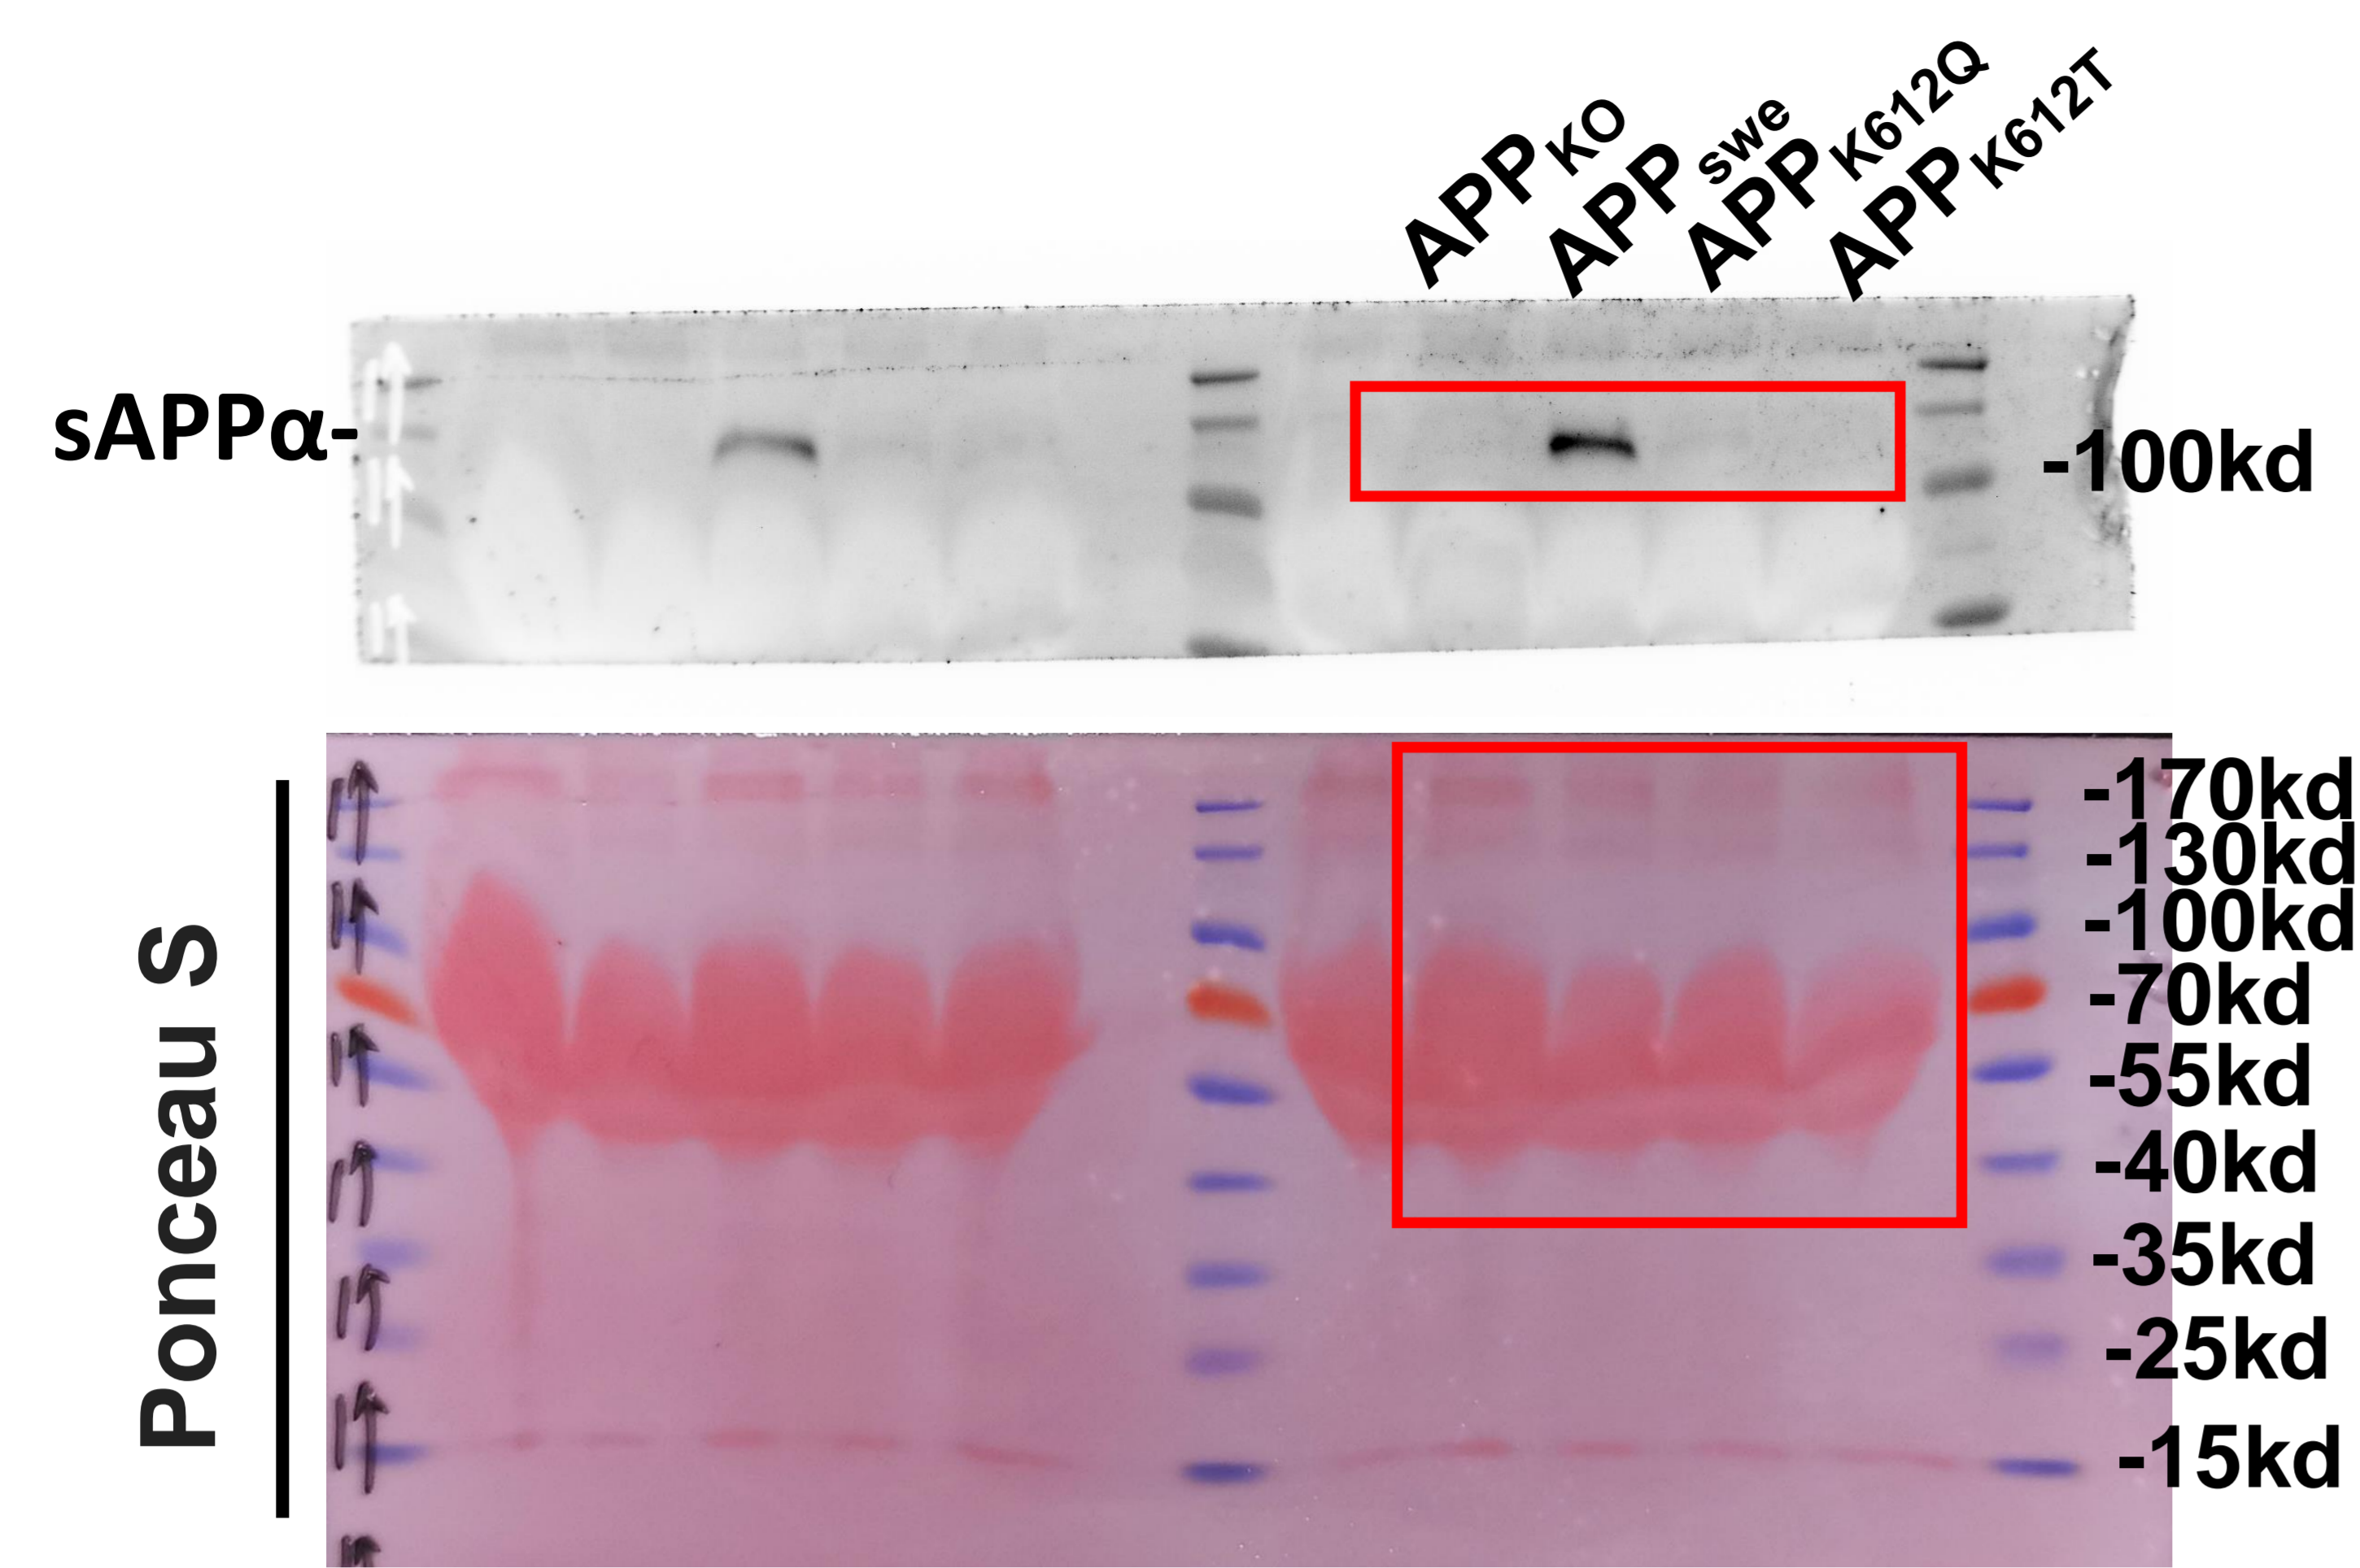

### Supplemental Figure 2E

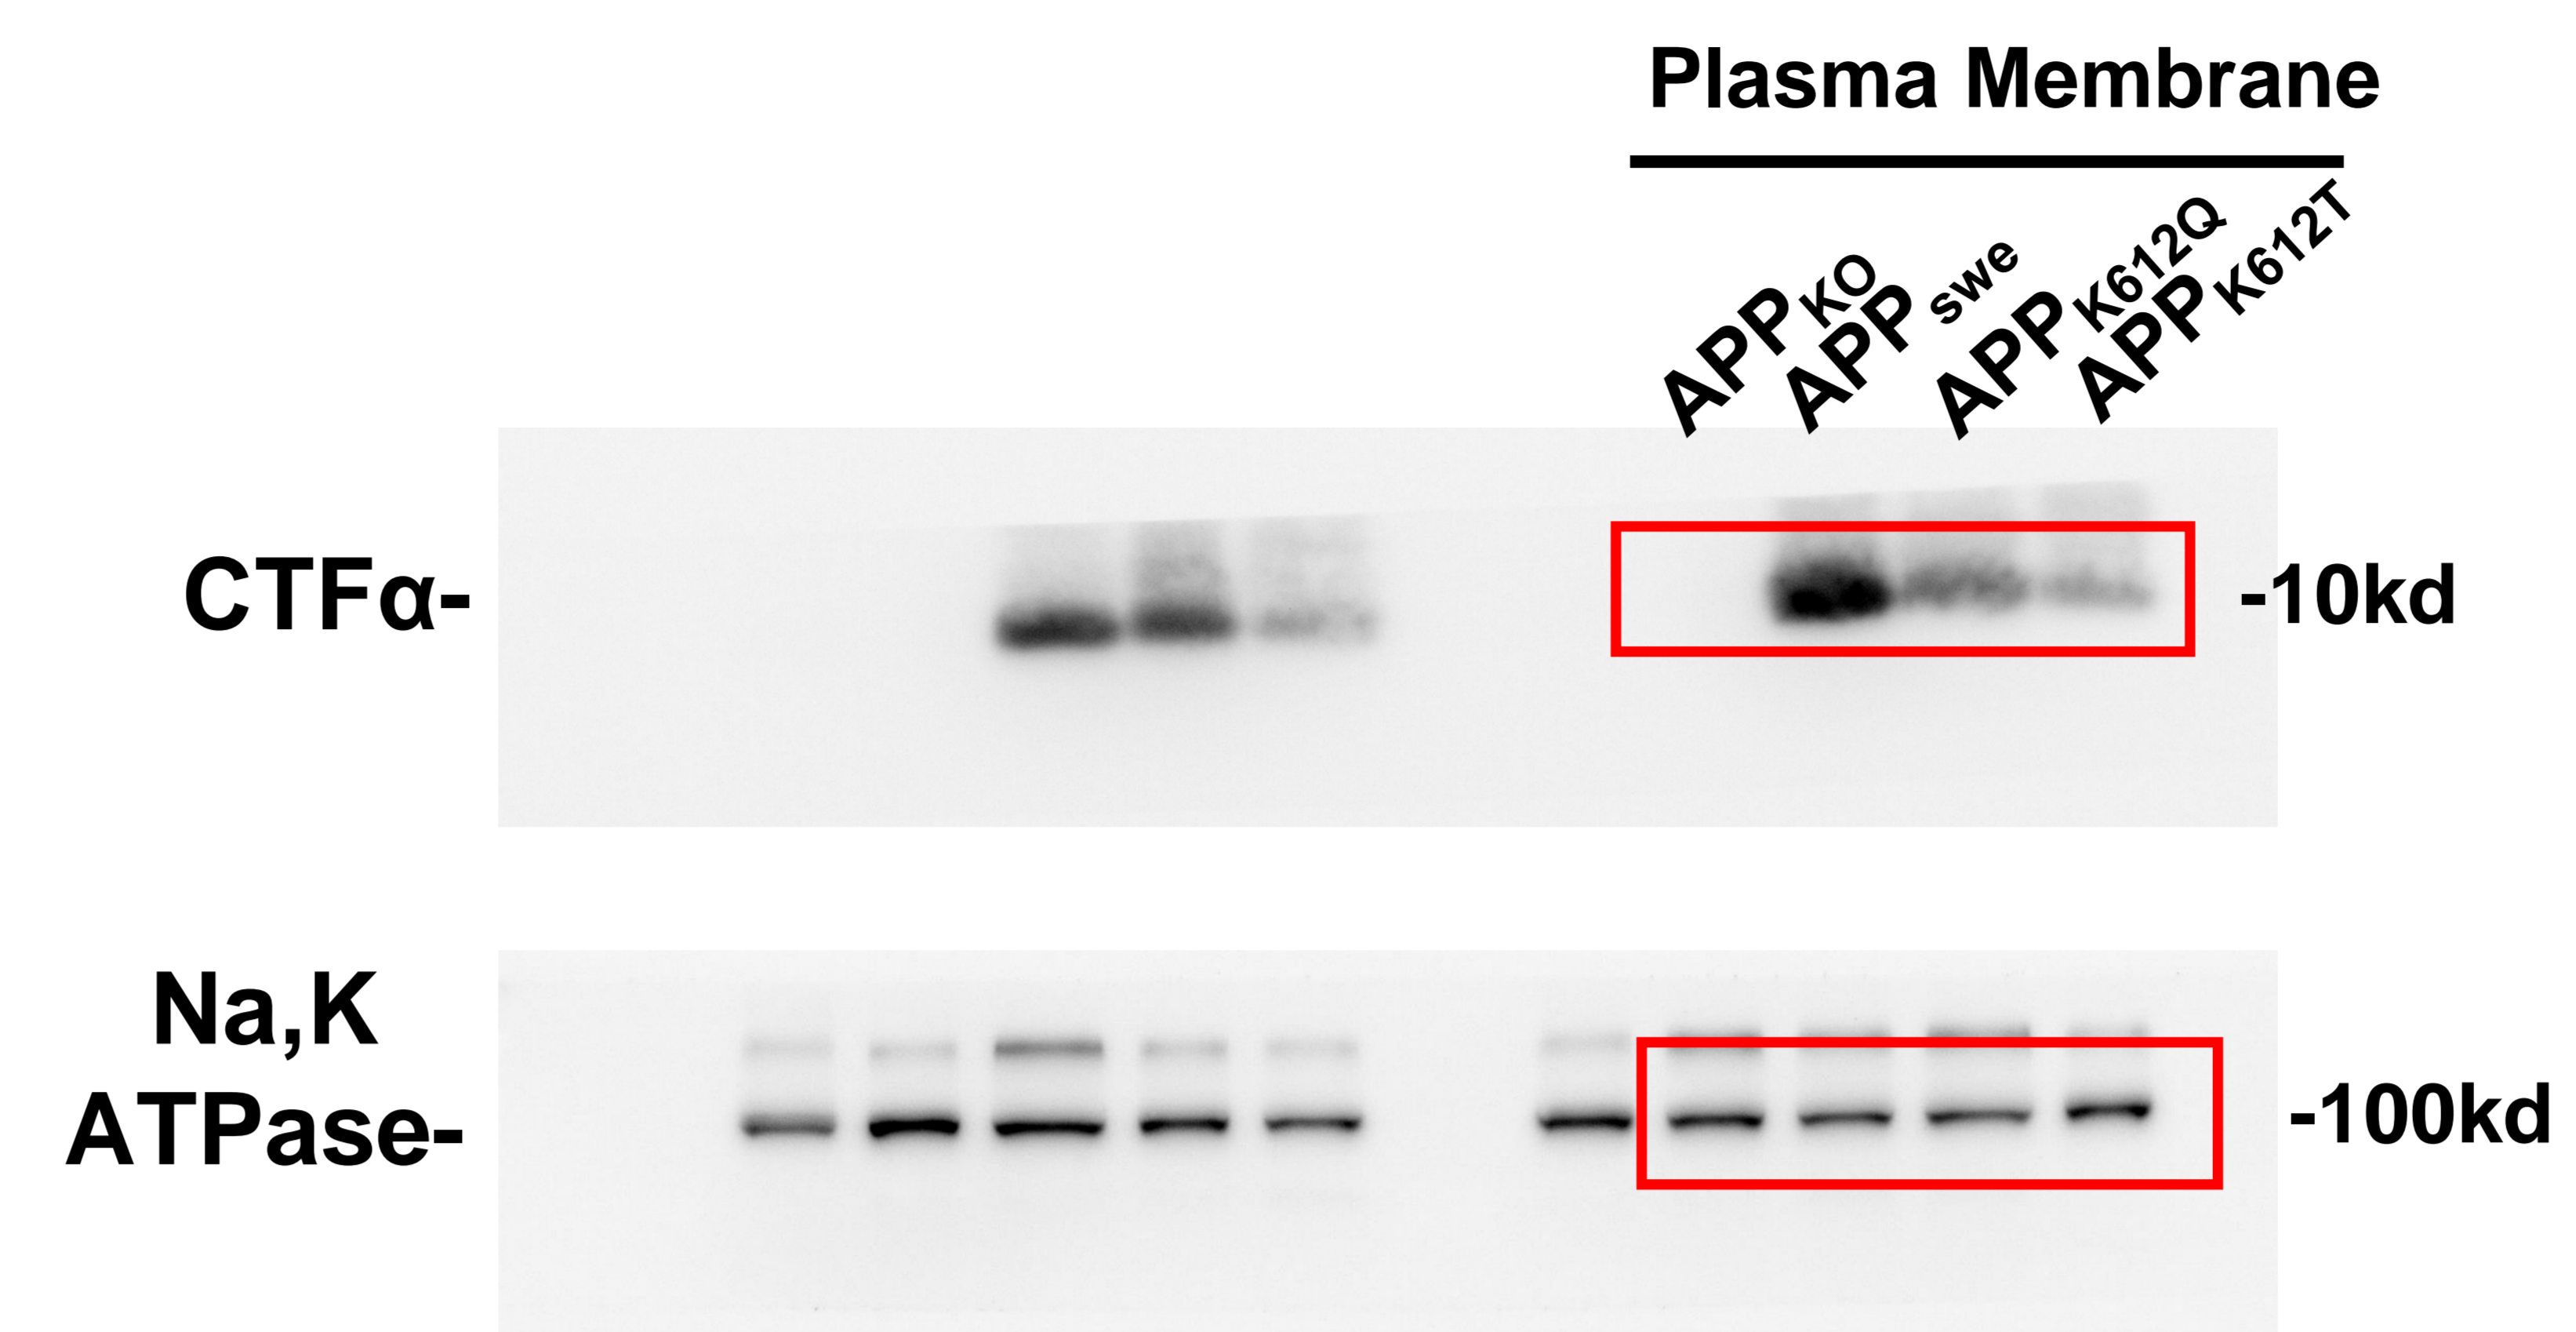

### Supplemental Figure 3A

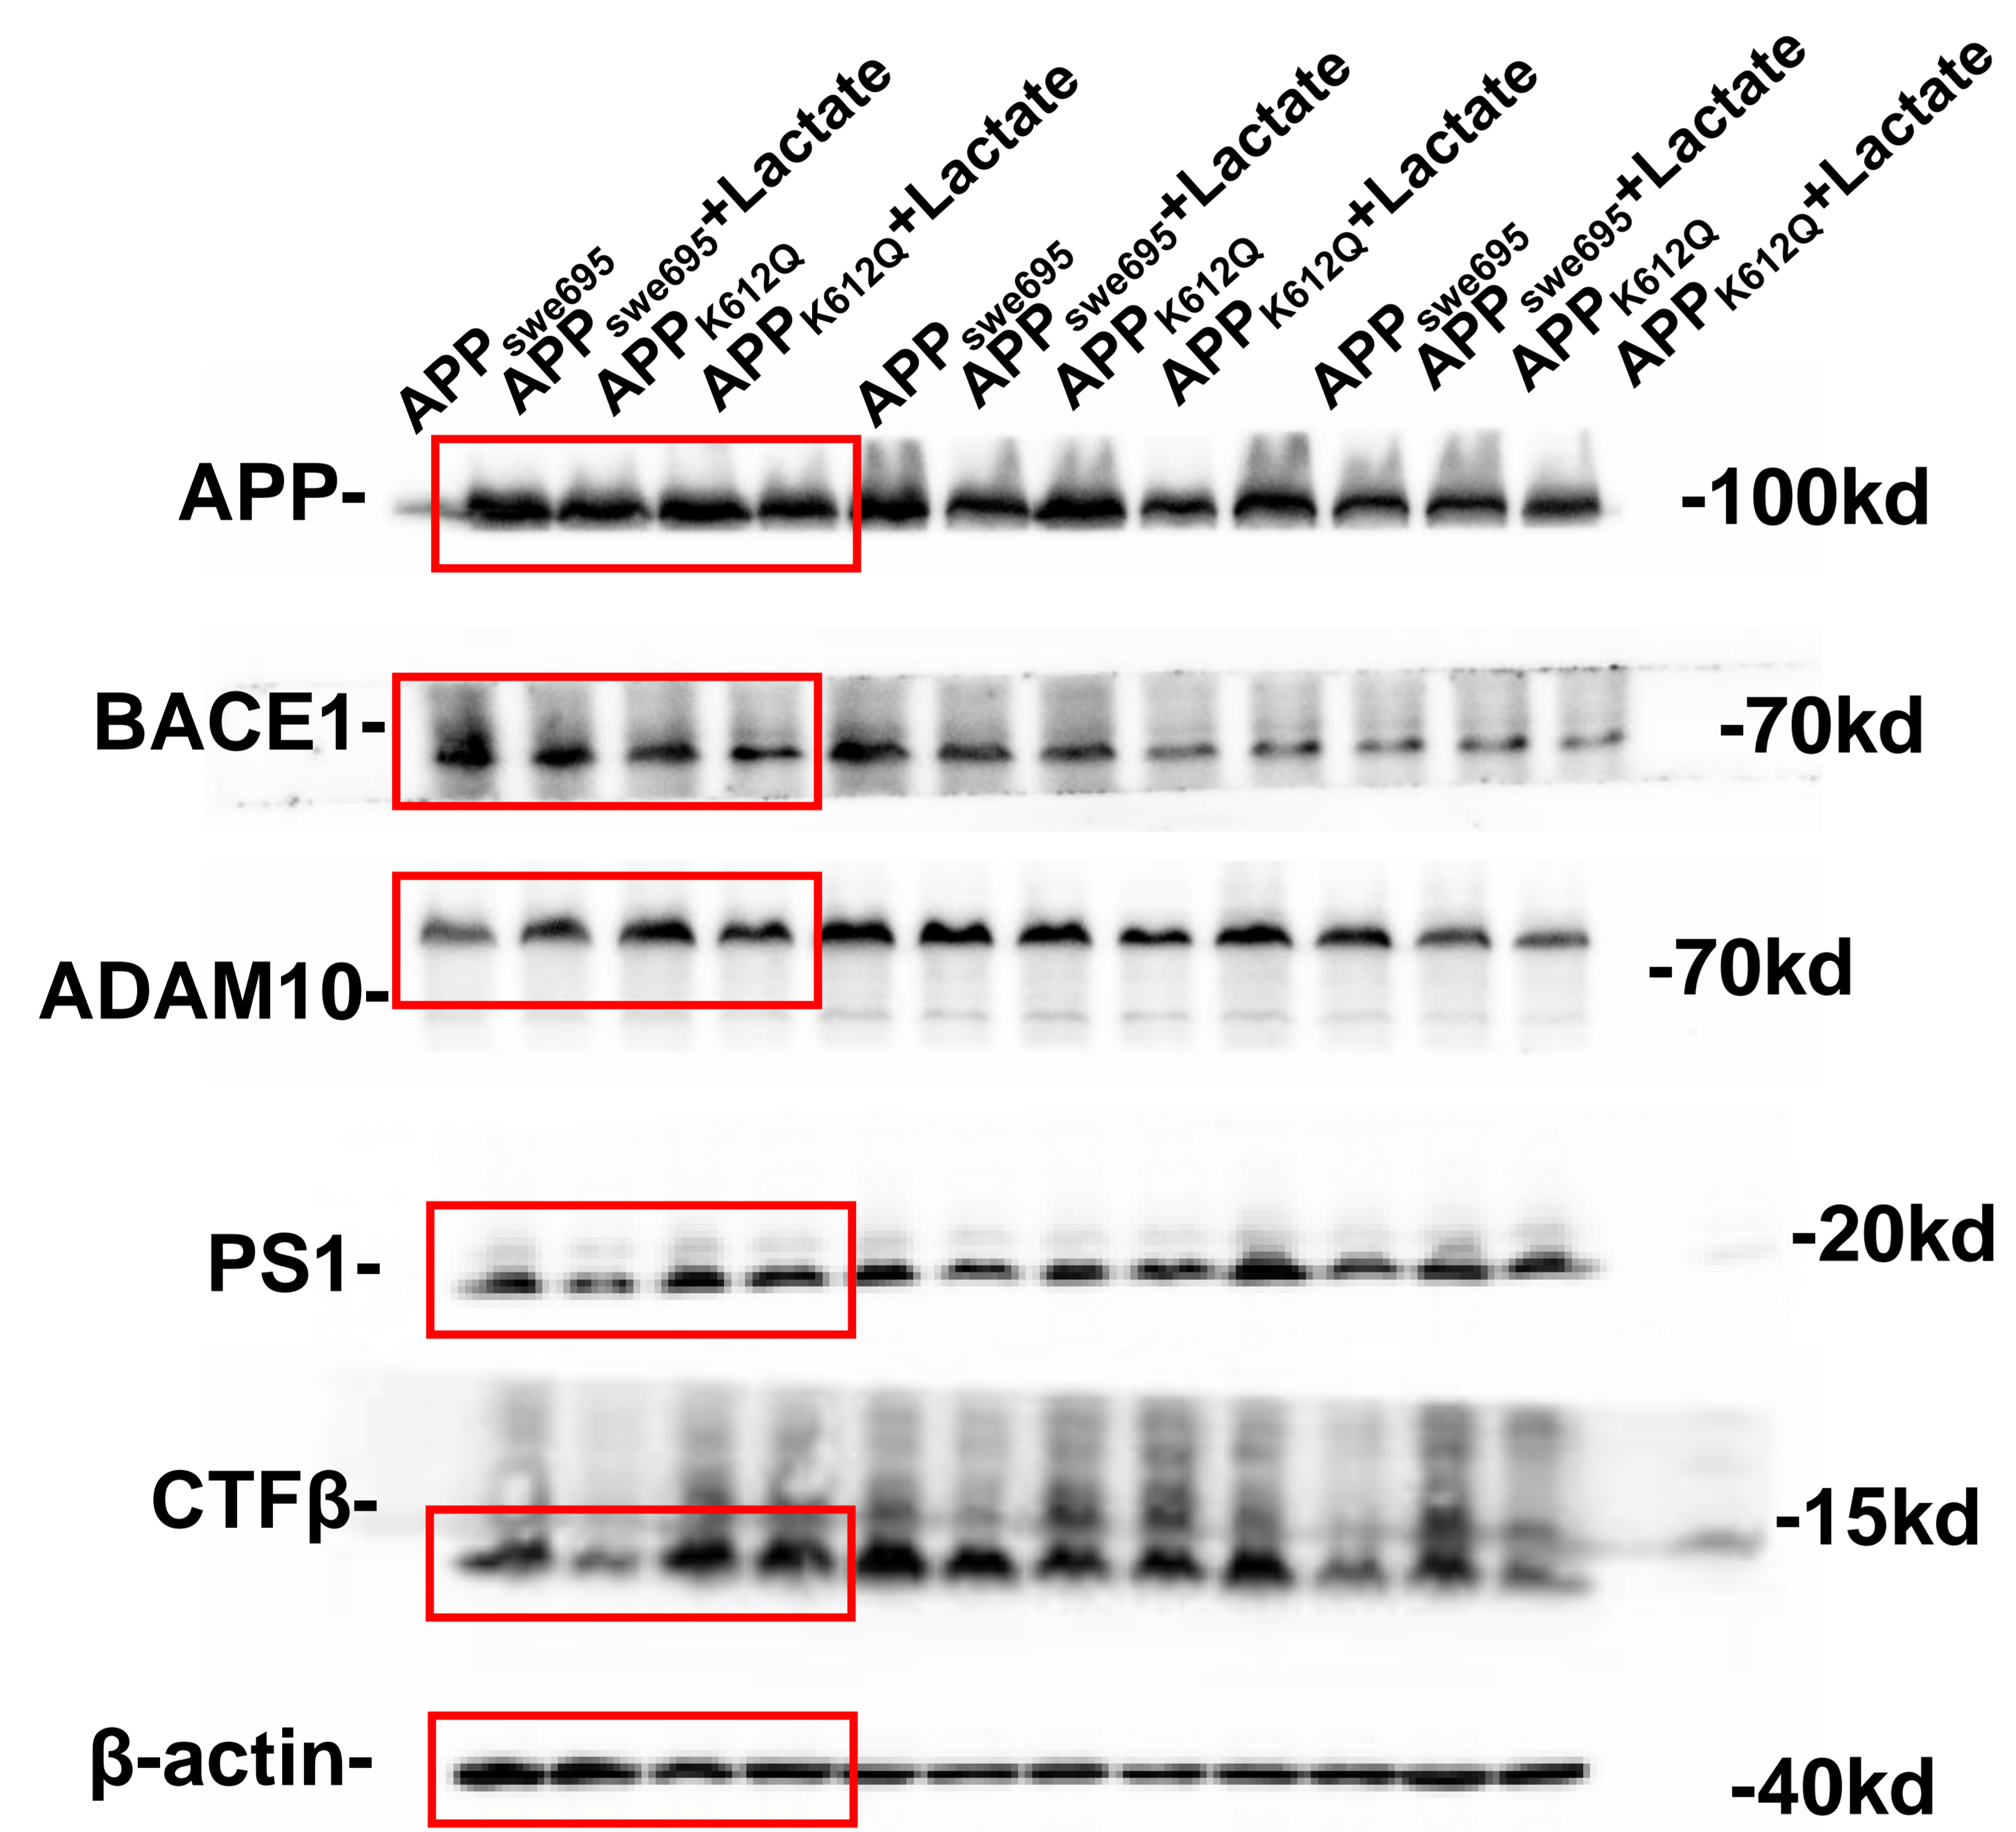

### Supplemental Figure 4B

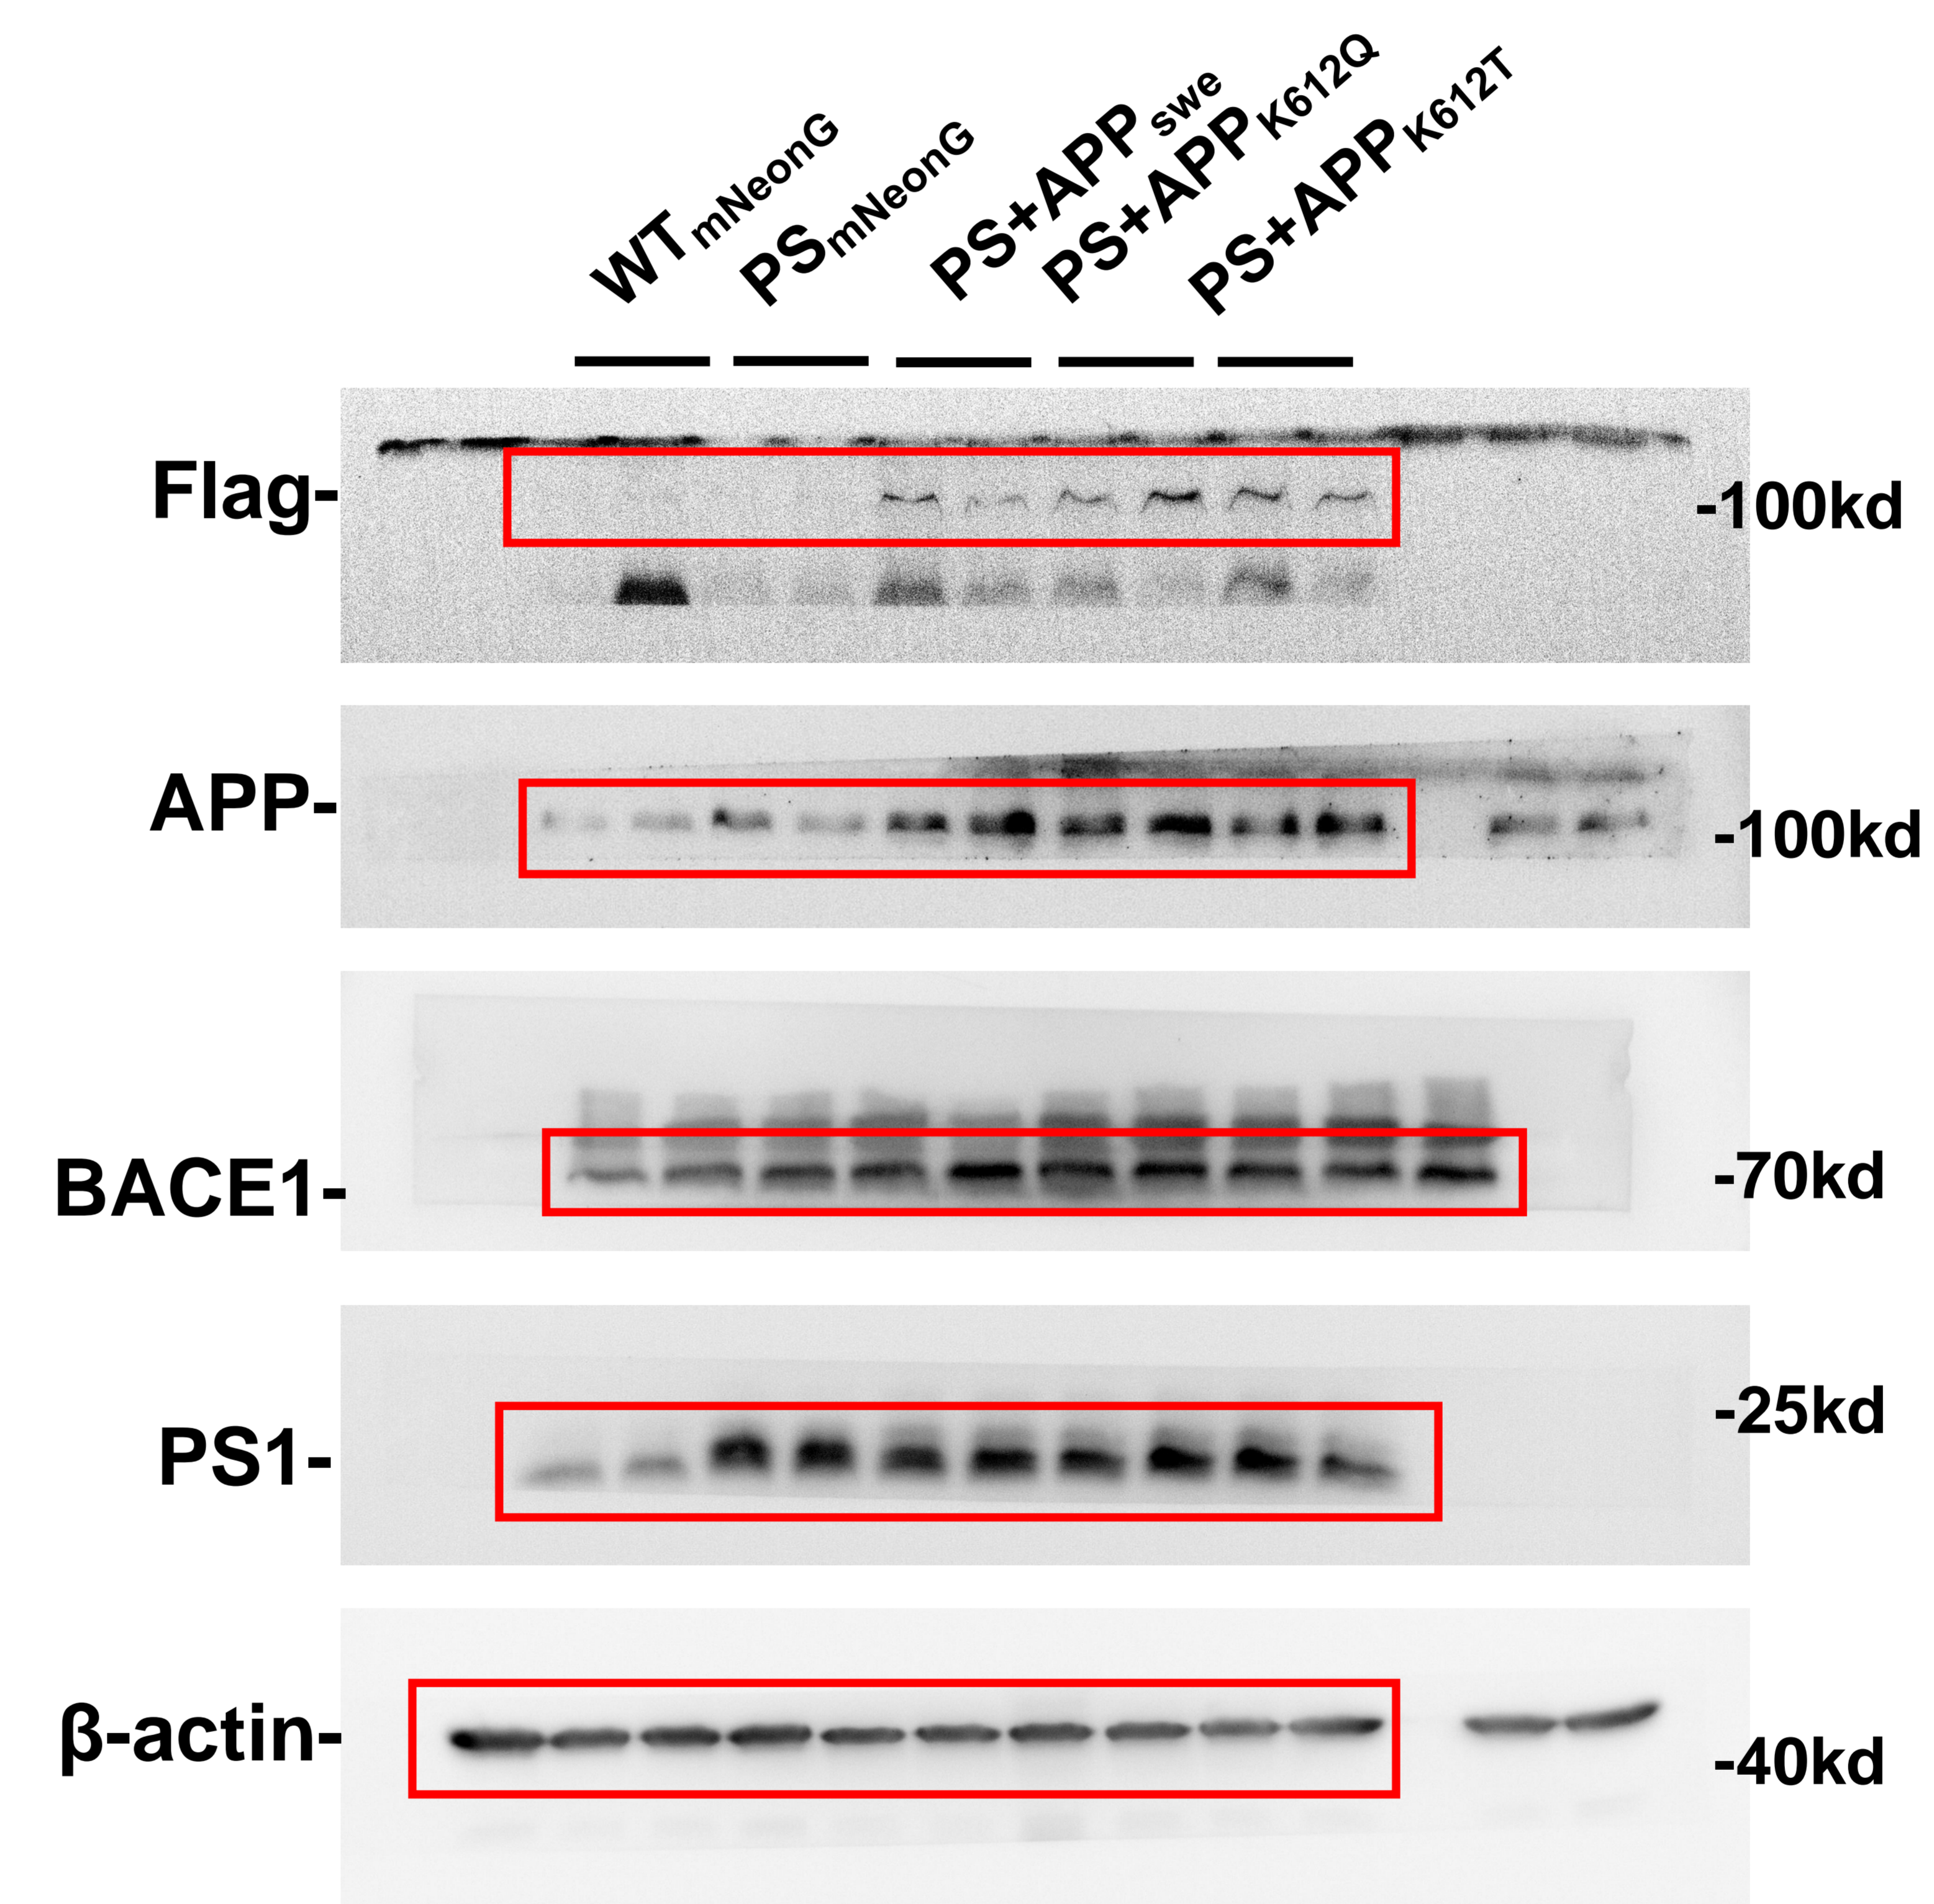

## Supplemental Figure 7

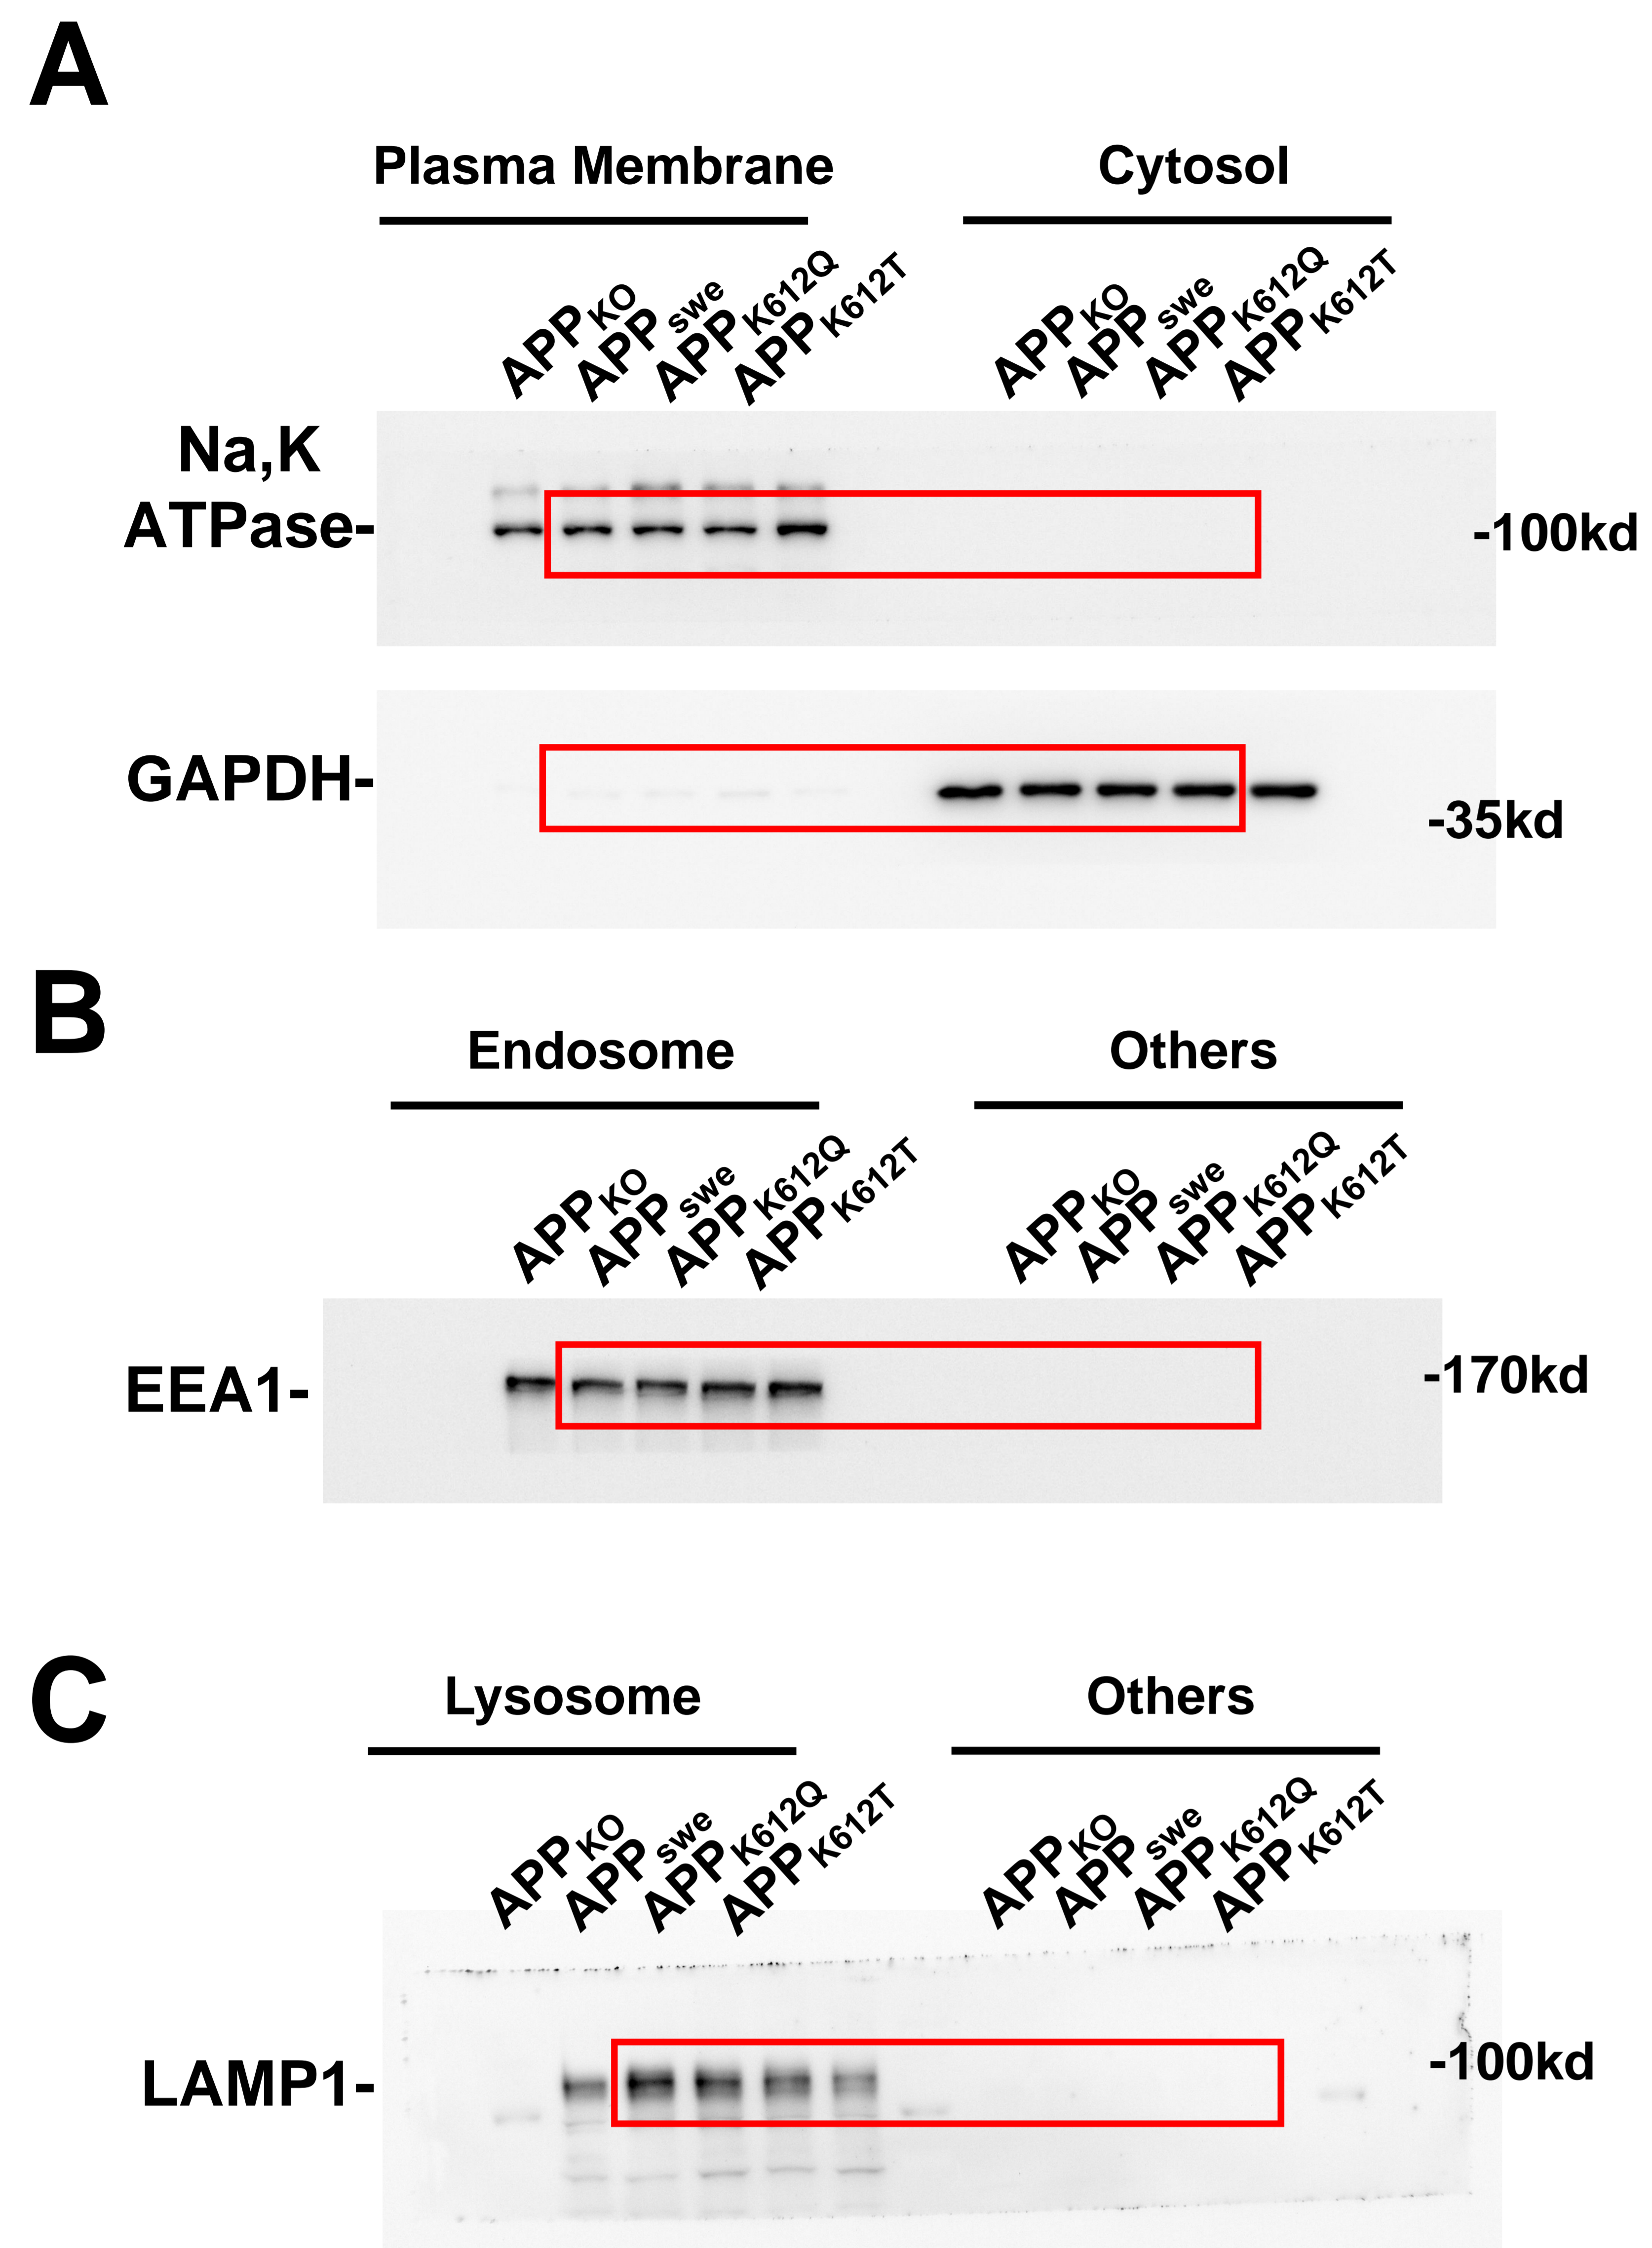

## Supplemental Figure 8A

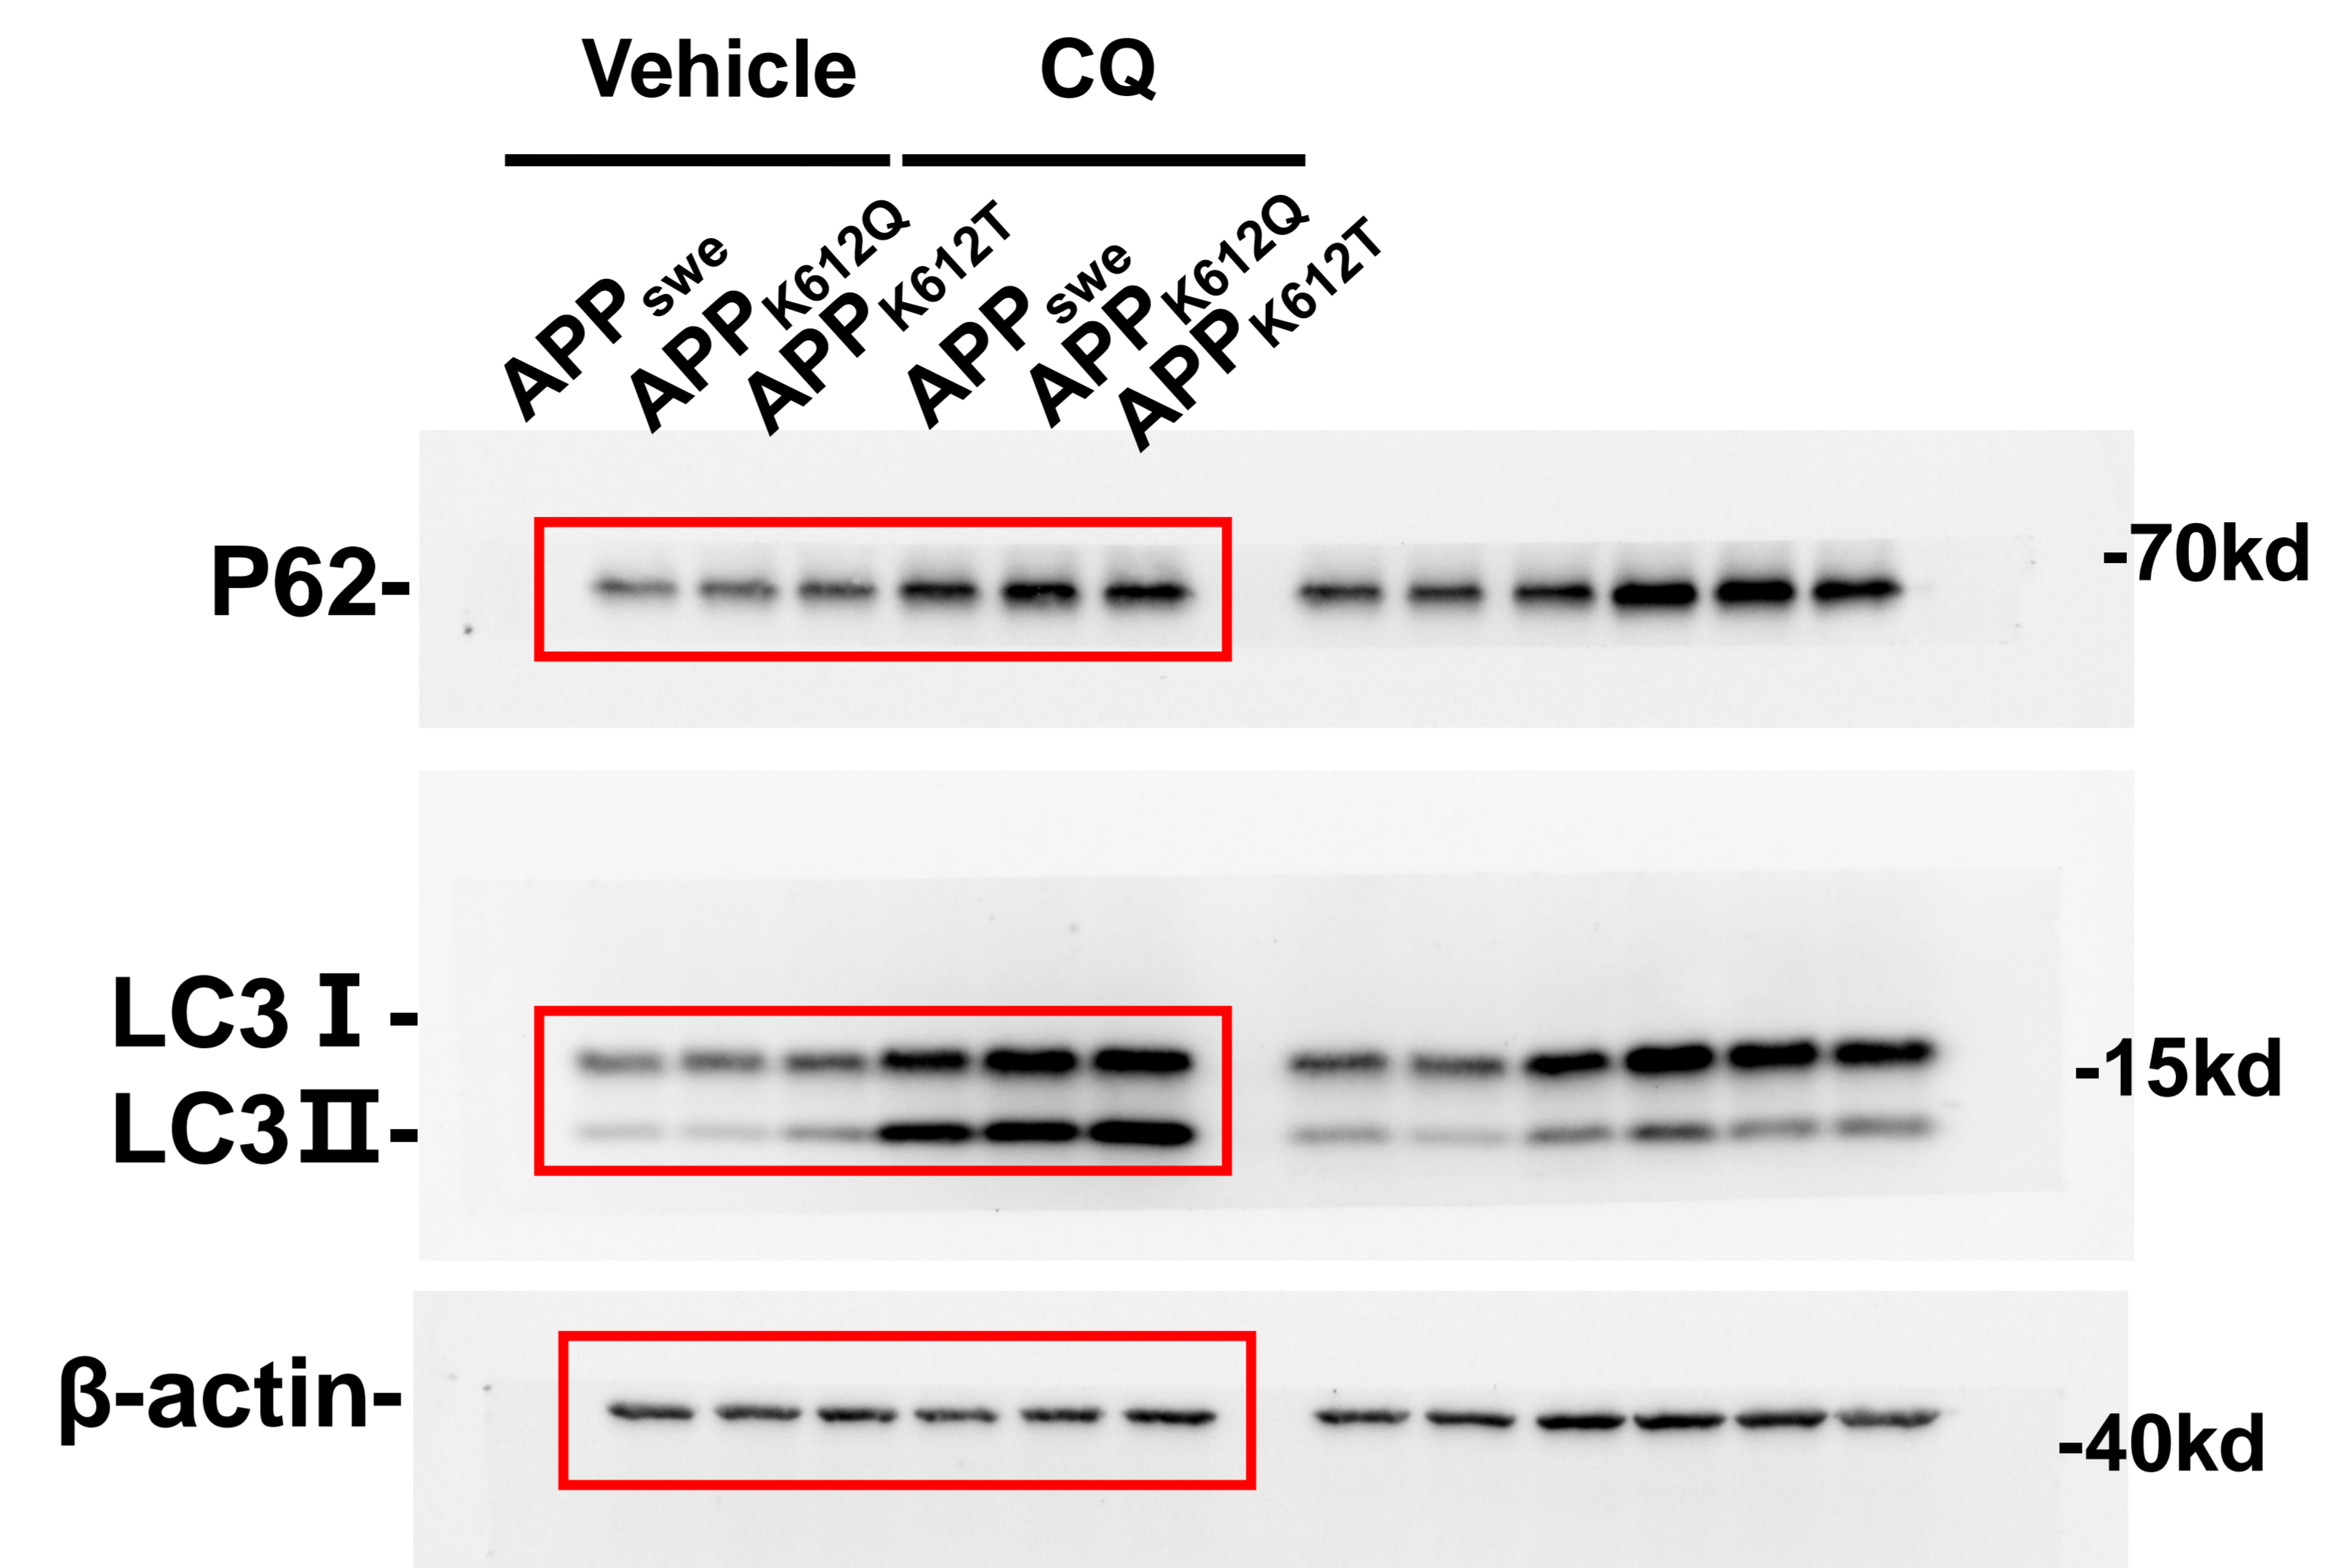

## Supplemental Figure 8D

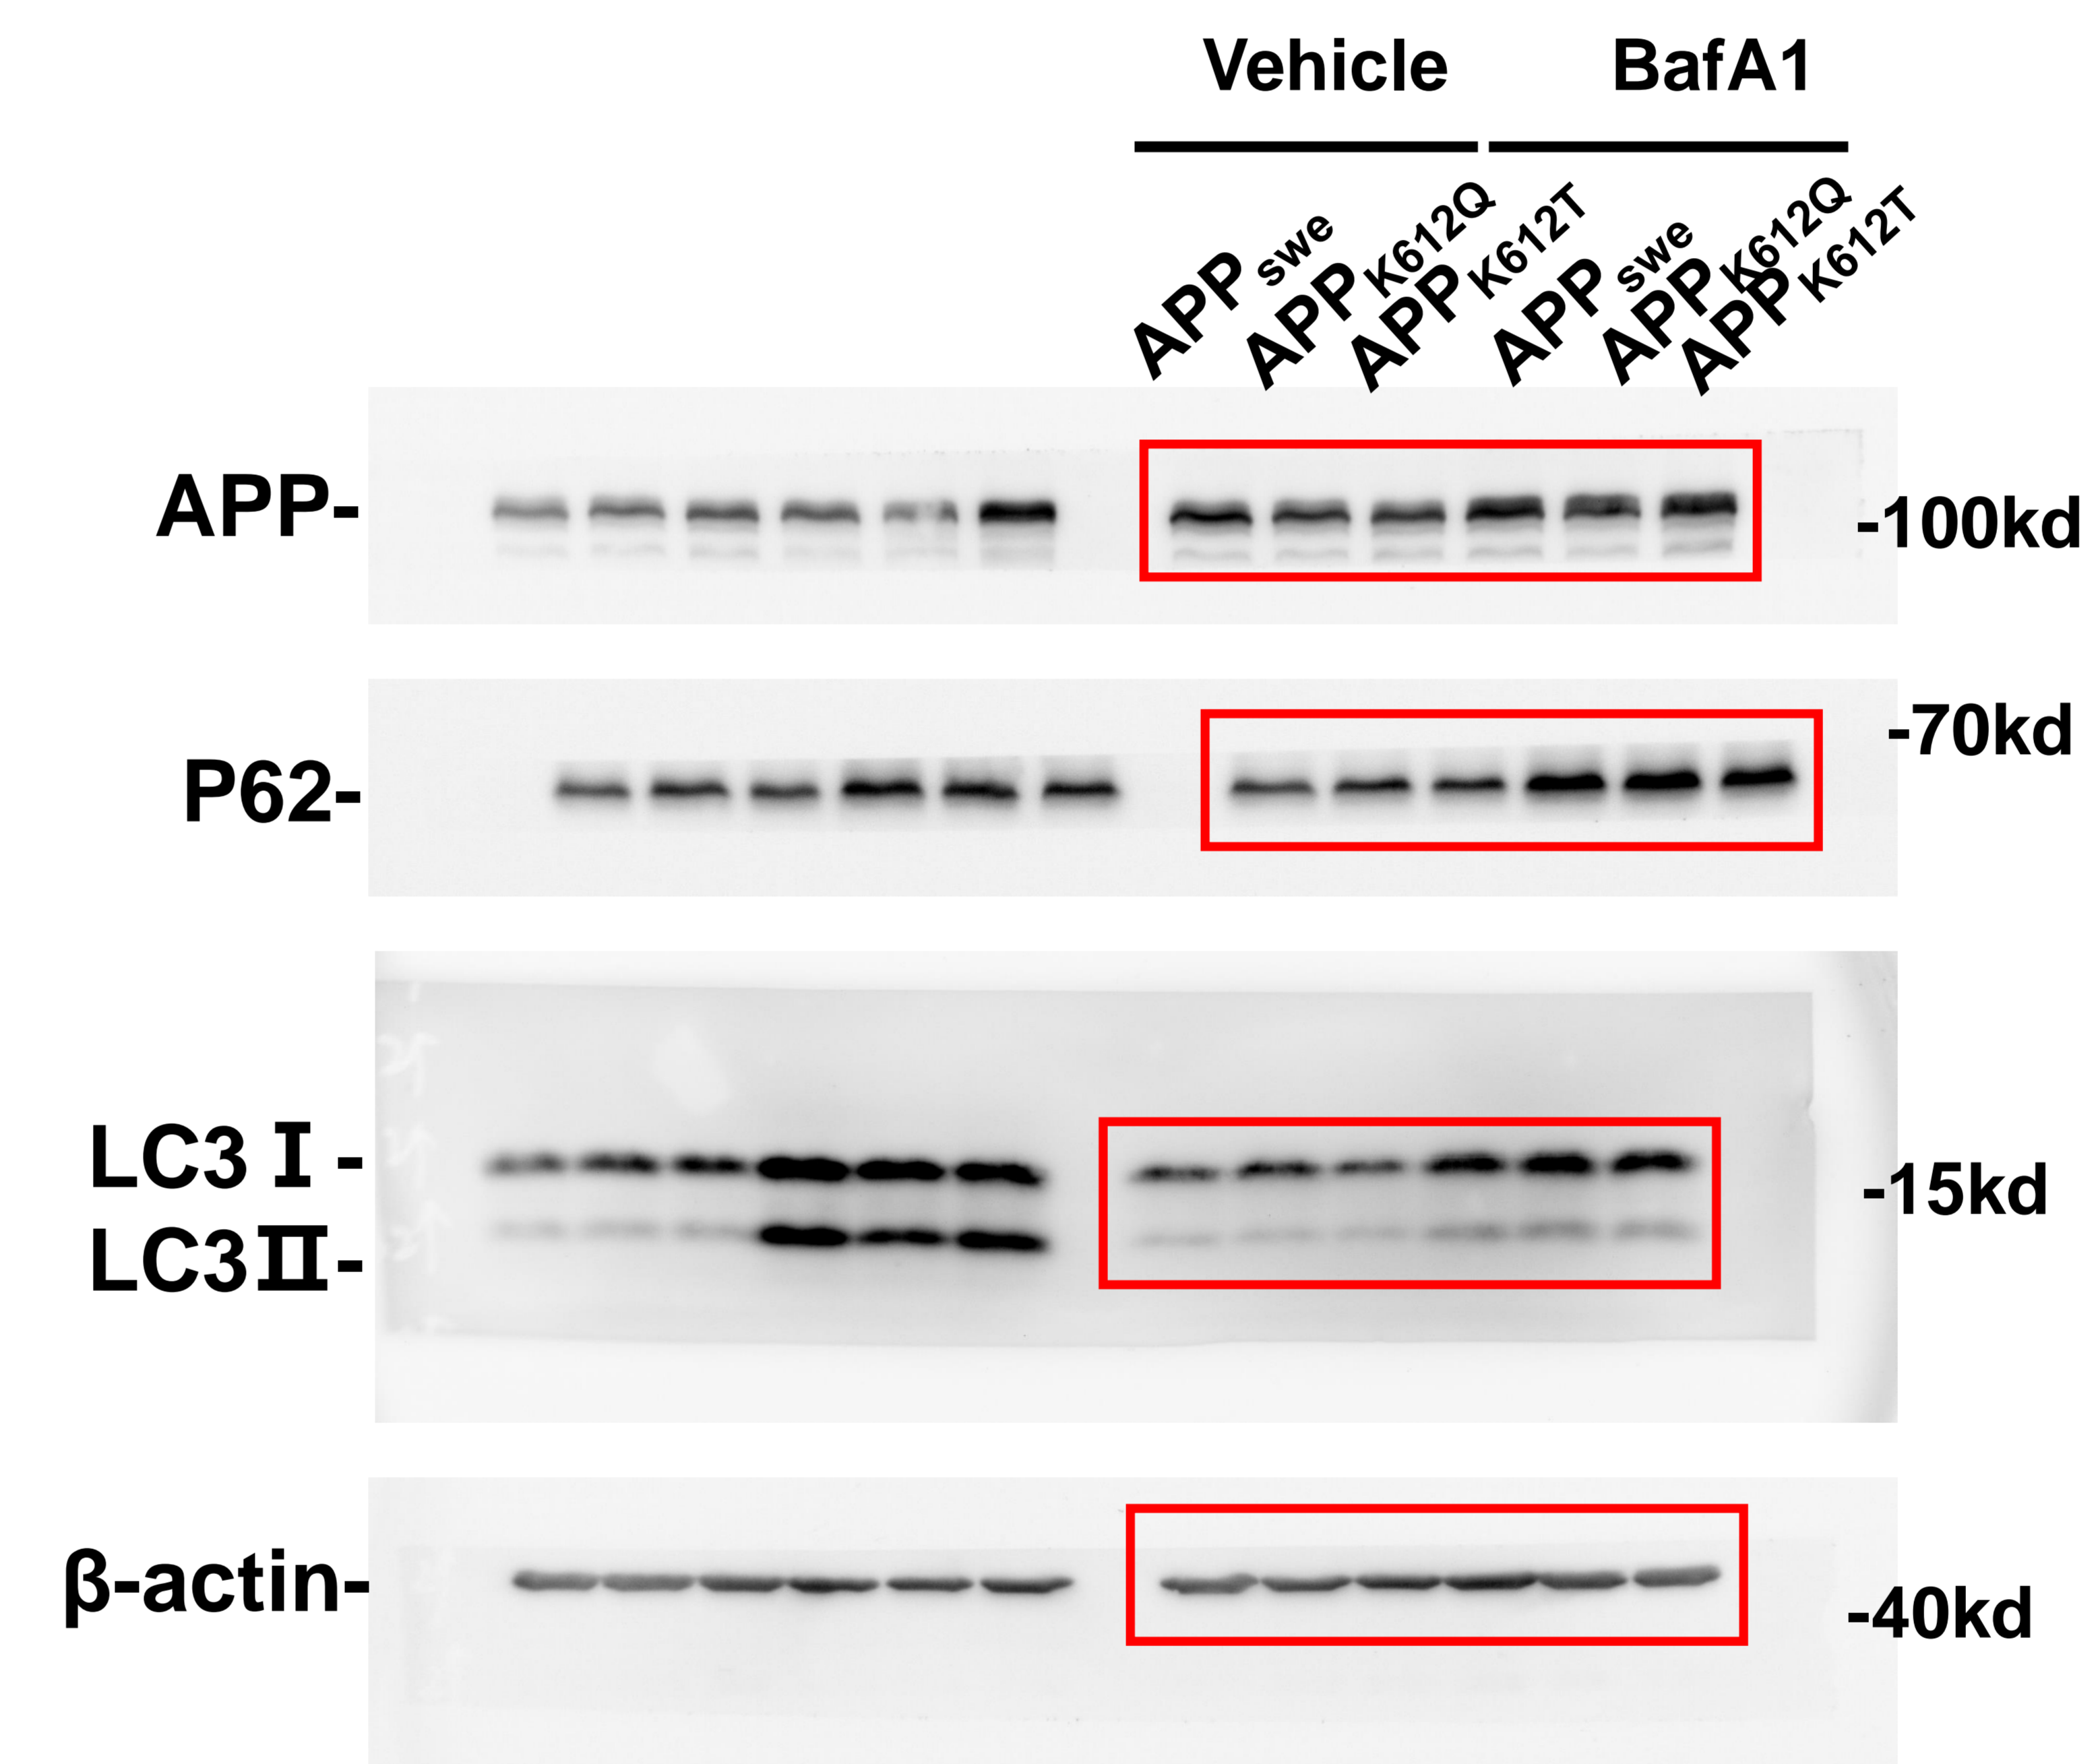

## Supplemental Figure 10B

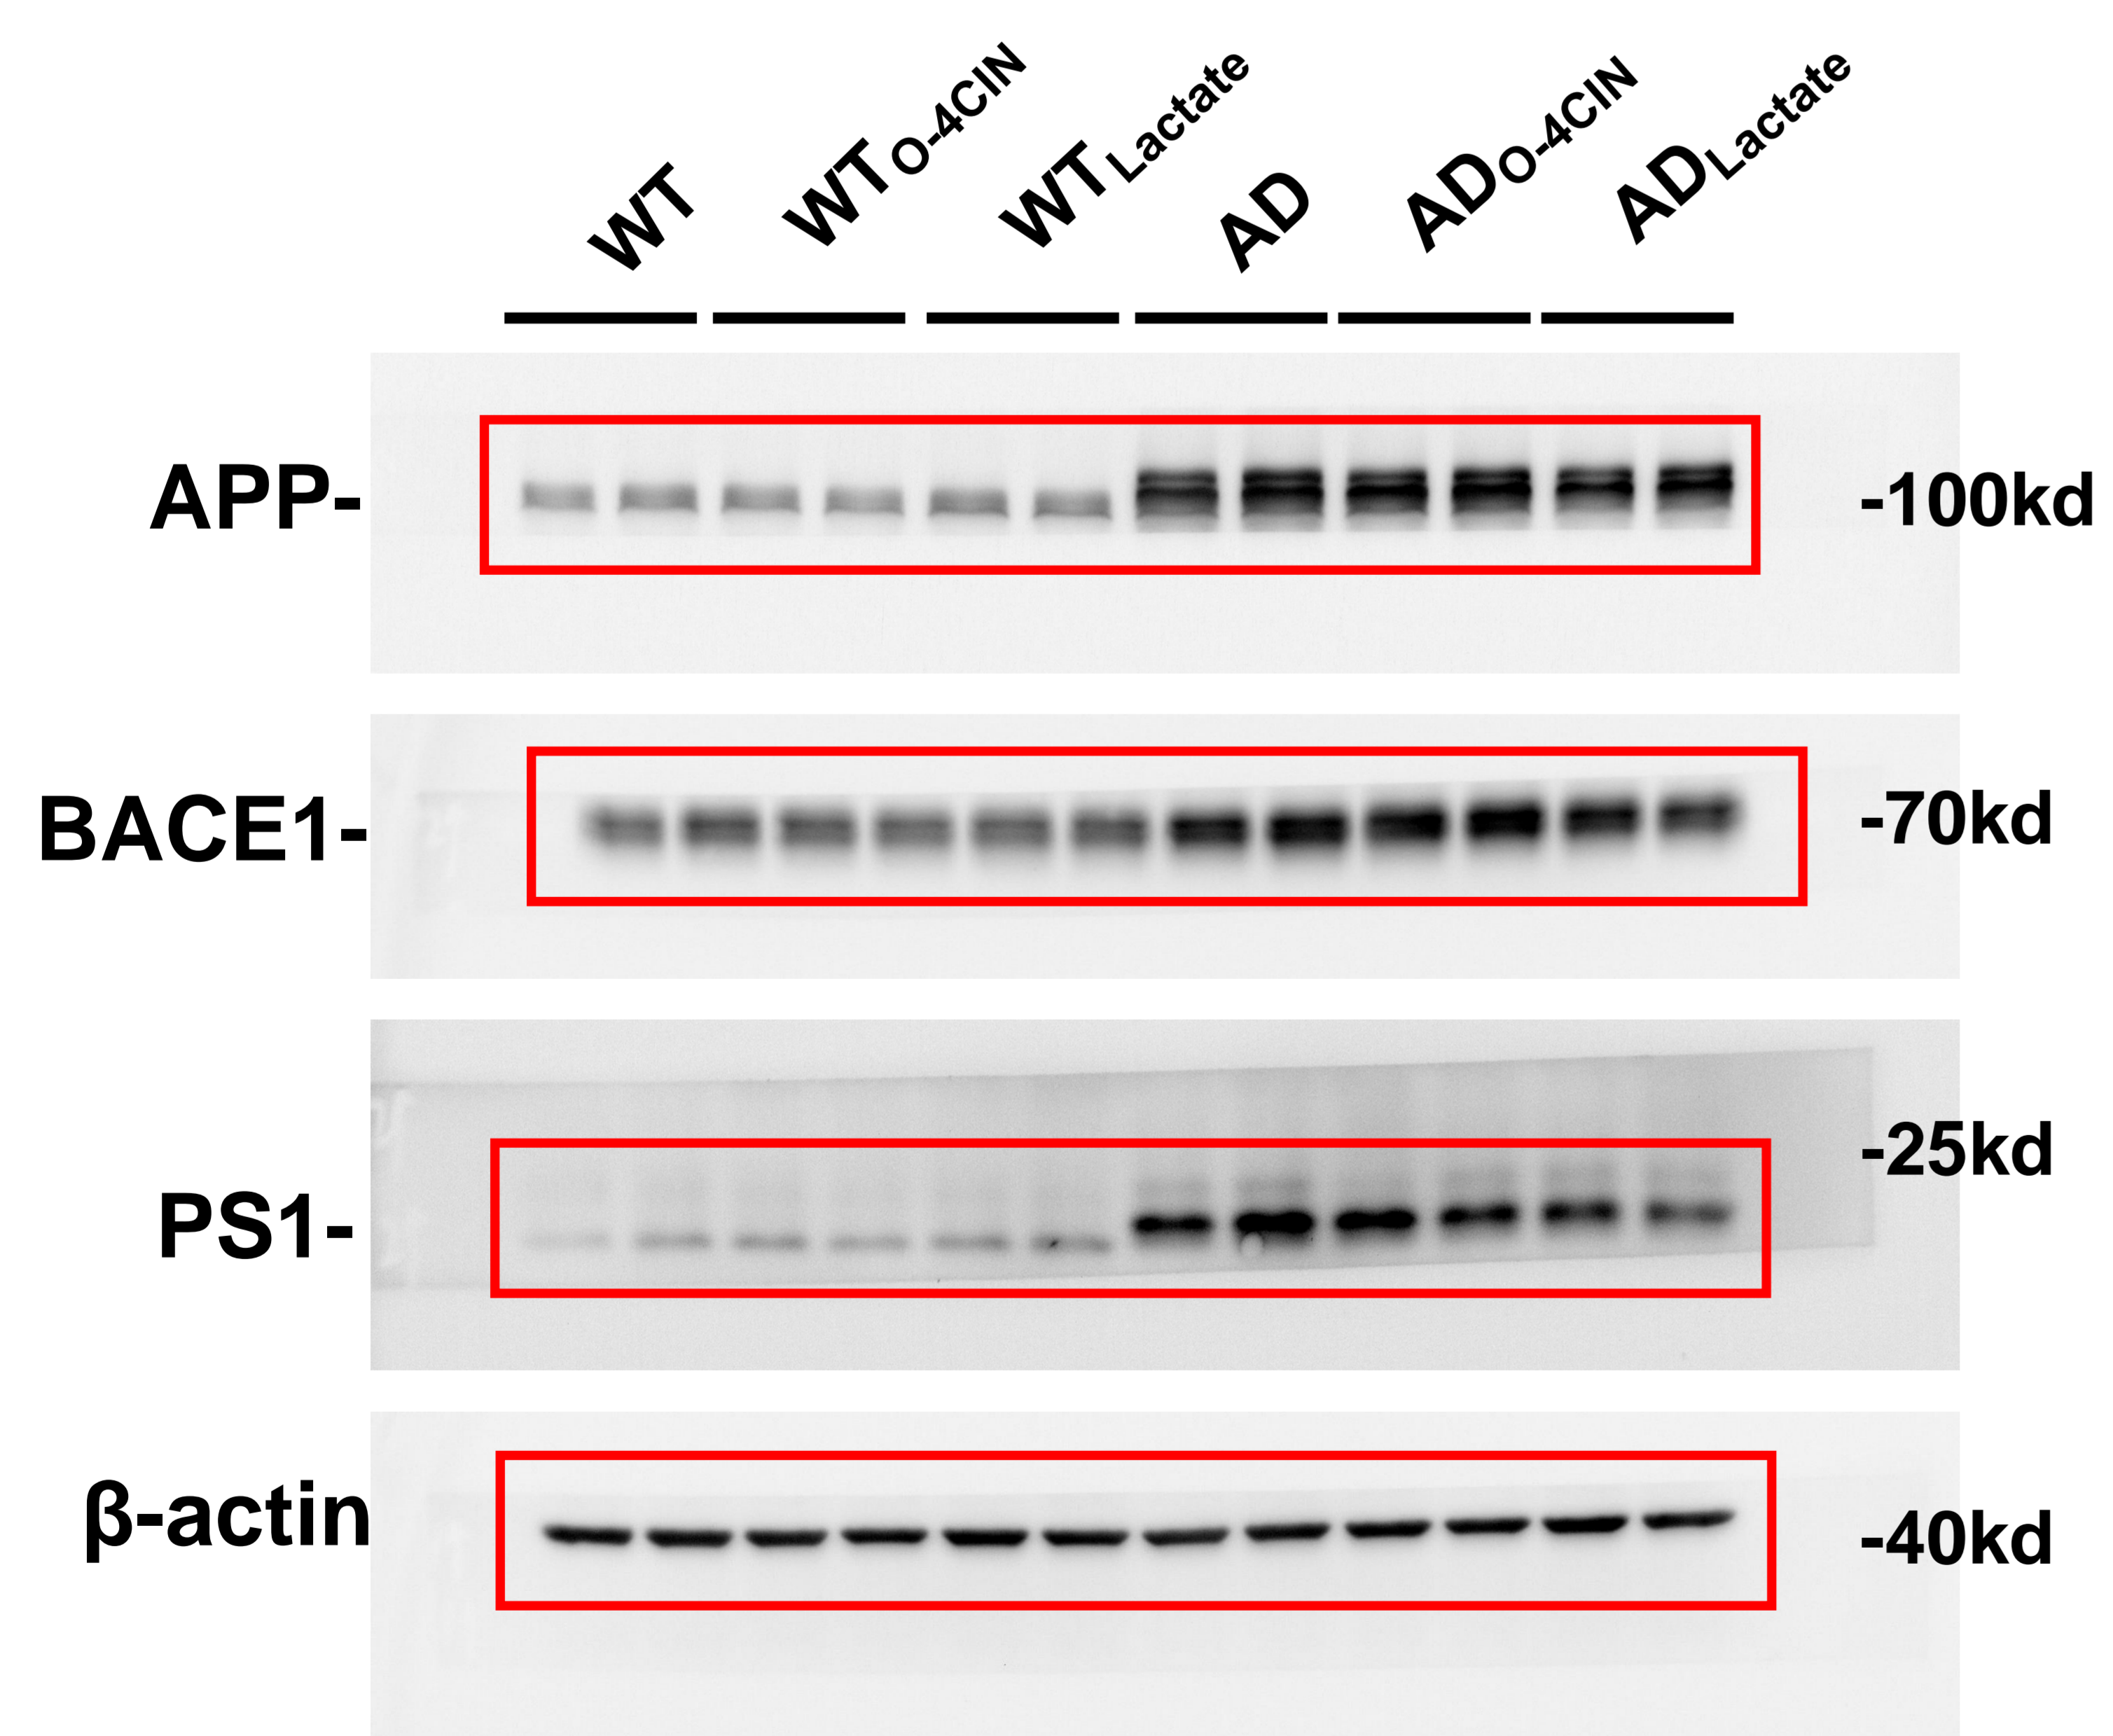

Supplement: sd2 [file 2]
